# Supplementary material for: The Alphaviral Capsid Protein Inhibits IRAK1-Dependent TLR Signaling
Source: Viruses. 2021 Feb 27;13(3):377. doi: 10.3390/v13030377 (PMC7997285; doi:10.3390/v13030377)
Supplement: Supplementary file 1 [file viruses-13-00377-s001.xlsx]

## Sheet: Information
	This file contains the raw analyses of the SINV CP BioID2 screen, and the ontological analysis results.
	Mass Spectrometric Analyses may be found in the corresponding GREEN tabbed sheets.
	Ontological Analyses may be found in the corresponding RED tabbed sheets.

## Sheet: 1810XX Data
	#181030_Sokoloski, Samples Report created on 11/13/2018				Quantitative Value (Normalized iBAQ)
#	Identified Proteins	Gene Name	Accession Number	Molecular Weight	Bio	CapsidBio
1	Cluster of Histone H3.2	HIST2H3A	sp|Q71DI3|H32_HUMAN	15 kDa	97545	25190000
2	Cluster of Histone H1.1	HIST1H1A	sp|Q02539|H11_HUMAN	22 kDa	571610000	781360000
3	Cluster of Heat shock 70 kDa protein 1A	HSPA1A	sp|P0DMV8|HS71A_HUMAN	70 kDa	18682000	15275000
4	Cluster of Isoform 2 of Filamin-A	FLNA	sp|P21333-2|FLNA_HUMAN	280 kDa	2520500	743480
5	SINV-CapsidBiolD2		is|SINV_CapsidBioID2|SINV_CapsidBiolD2	57 kDa	7716900	41409000
6	DNA-dependent protein kinase catalytic subunit	PRKDC	sp|P78527|PRKDC_HUMAN	469 kDa	385730	81463
7	Cluster of Keratin, type I cytoskeletal 10	KRT10	sp|P13645|K1C10_HUMAN	59 kDa	2901600	2768200
8	Cluster of Vimentin	VIM	sp|P08670|VIME_HUMAN	54 kDa	9165100	5049200
9	Cluster of Tubulin beta chain	TUBB	sp|P07437|TBB5_HUMAN	50 kDa	3105100	4356100
10	Cluster of Tubulin alpha-1B chain	TUBA1B	sp|P68363|TBA1B_HUMAN	50 kDa	8447900	1787500
11	Microtubule-associated protein 1B	MAP1B	sp|P46821|MAP1B_HUMAN	271 kDa	84562	124090
12	Keratin, type II cytoskeletal 1	KRT1	sp|P04264|K2C1_HUMAN	66 kDa	2452000	7714700
13	Cluster of Isoform 2 of ATP-dependent RNA helicase DDX3X	DDX3X	sp|O00571-2|DDX3X_HUMAN	71 kDa	1171100	293600
14	60S ribosomal protein L4	RPL4	sp|P36578|RL4_HUMAN	48 kDa	12231000	1005500
15	Pyruvate carboxylase, mitochondrial	PC	sp|P11498|PYC_HUMAN	130 kDa	582620	351270
16	Cluster of Keratin, type II cytoskeletal 2 epidermal	KRT2	sp|P35908|K22E_HUMAN	65 kDa	1172700	1449300
17	Cytoplasmic dynein 1 heavy chain 1	DYNC1H1	sp|Q14204|DYHC1_HUMAN	532 kDa	26356	12192
18	Cluster of Pyruvate kinase PKM	PKM	sp|P14618|KPYM_HUMAN	58 kDa	825520	879030
19	Keratin, type I cytoskeletal 9	KRT9	sp|P35527|K1C9_HUMAN	62 kDa	526120	1573200
20	ATP-dependent RNA helicase A	DHX9	sp|Q08211|DHX9_HUMAN	141 kDa	165840	39012
21	T-complex protein 1 subunit eta	CCT7	sp|Q99832|TCPH_HUMAN	59 kDa	296440	211890
22	Elongation factor 2	EEF2	sp|P13639|EF2_HUMAN	95 kDa	109190	17367
23	Cluster of Isoform 3 of Treacle protein	TCOF1	sp|Q13428-3|TCOF_HUMAN	152 kDa	946120	1073600
24	Nucleolar RNA helicase 2	DDX21	sp|Q9NR30|DDX21_HUMAN	87 kDa	667210	626820
25	DNA topoisomerase 1	TOP1	sp|P11387|TOP1_HUMAN	91 kDa	1664600	2181800
26	Cluster of Probable ATP-dependent RNA helicase DDX5	DDX5	sp|P17844|DDX5_HUMAN	69 kDa	751100	379030
27	60S ribosomal protein L3	RPL3	sp|P39023|RL3_HUMAN	46 kDa	3870500	1618300
28	Fatty acid synthase	FASN	sp|P49327|FAS_HUMAN	273 kDa	49121	25955
29	Isoform 2 of Nuclear mitotic apparatus protein 1	NUMA1	sp|Q14980-2|NUMA1_HUMAN	237 kDa	25863	6074.4
30	Cluster of 40S ribosomal protein S4, X isoform	RPS4X	sp|P62701|RS4X_HUMAN	30 kDa	3939300	768540
31	Histone H4	HIST1H4A	sp|P62805|H4_HUMAN	11 kDa	102530000	9165400
32	60S ribosomal protein L7a	RPL7A	sp|P62424|RL7A_HUMAN	30 kDa	10428000	4108900
33	Poly [ADP-ribose] polymerase 1	PARP1	sp|P09874|PARP1_HUMAN	113 kDa	209360	119440
34	Cluster of ADP/ATP translocase 2	SLC25A5	sp|P05141|ADT2_HUMAN	33 kDa	1123900	198030
35	60S ribosomal protein L6	RPL6	sp|Q02878|RL6_HUMAN	33 kDa	7038500	3999700
36	Isoform 2 of Coatomer subunit alpha	COPA	sp|P53621-2|COPA_HUMAN	139 kDa	23621	44313
37	T-complex protein 1 subunit alpha	TCP1	sp|P17987|TCPA_HUMAN	60 kDa	35026	205880
38	Isoform 2 of Propionyl-CoA carboxylase beta chain, mitochondrial	PCCB	sp|P05166-2|PCCB_HUMAN	61 kDa	413980	134630
39	Cluster of Heat shock protein HSP 90-beta	HSP90AB1	sp|P08238|HS90B_HUMAN	83 kDa	270490	278750
40	40S ribosomal protein S8	RPS8	sp|P62241|RS8_HUMAN	24 kDa	27971000	13397000
41	Cluster of Isoform 2 of Clathrin heavy chain 1	CLTC	sp|Q00610-2|CLH1_HUMAN	188 kDa	35612	63205
42	Isoform 2 of Propionyl-CoA carboxylase alpha chain, mitochondrial	PCCA	sp|P05165-2|PCCA_HUMAN	77 kDa	533020	280780
43	Cluster of Cyclin-dependent kinase 1	CDK1	sp|P06493|CDK1_HUMAN	34 kDa	280080	72339
44	60S ribosomal protein L7	RPL7	sp|P18124|RL7_HUMAN	29 kDa	13184000	3780800
45	Isoform 2 of Heterogeneous nuclear ribonucleoprotein U	HNRNPU	sp|Q00839-2|HNRPU_HUMAN	89 kDa	377140	677760
46	Cluster of Alpha-enolase	ENO1	sp|P06733|ENOA_HUMAN	47 kDa	250970	94392
47	40S ribosomal protein S2	RPS2	sp|P15880|RS2_HUMAN	31 kDa	1478500	176990
48	Myosin-9	MYH9	sp|P35579|MYH9_HUMAN	227 kDa	0	17042
49	Cluster of Histone H2B type 1-N	HIST1H2BN	sp|Q99877|H2B1N_HUMAN	14 kDa	1346300	0
50	Cluster of Isoform 3 of L-lactate dehydrogenase A chain	LDHA	sp|P00338-3|LDHA_HUMAN	40 kDa	238070	14483
51	Bifunctional glutamate/proline--tRNA ligase	EPRS	sp|P07814|SYEP_HUMAN	171 kDa	25789	29410
52	40S ribosomal protein S6	RPS6	sp|P62753|RS6_HUMAN	29 kDa	1823900	2131900
53	Ubiquitin-40S ribosomal protein S27a	RPS27A	sp|P62979|RS27A_HUMAN	18 kDa	3050300	6435400
54	Receptor of activated protein C kinase 1	RACK1	sp|P63244|RACK1_HUMAN	35 kDa	546660	147900
55	Neuroblast differentiation-associated protein AHNAK	AHNAK	sp|Q09666|AHNK_HUMAN	629 kDa	7903.2	8122.4
56	Prohibitin-2	PHB2	sp|Q99623|PHB2_HUMAN	33 kDa	423530	452580
57	Cluster of Isoform C1 of Heterogeneous nuclear ribonucleoproteins C1/C2	HNRNPC	sp|P07910-2|HNRPC_HUMAN	32 kDa	317330	117450
58	Isoform 2 of Myosin-10	MYH10	sp|P35580-2|MYH10_HUMAN	231 kDa	9419.3	2428
59	40S ribosomal protein S9	RPS9	sp|P46781|RS9_HUMAN	23 kDa	3662700	699080
60	Non-POU domain-containing octamer-binding protein	NONO	sp|Q15233|NONO_HUMAN	54 kDa	695290	198650
61	pre-rRNA processing protein FTSJ3	FTSJ3	sp|Q8IY81|SPB1_HUMAN	97 kDa	25559	5935.1
62	Splicing factor 3B subunit 1	SF3B1	sp|O75533|SF3B1_HUMAN	146 kDa	70692	0
63	Isoform 2 of Myb-binding protein 1A	MYBBP1A	sp|Q9BQG0-2|MBB1A_HUMAN	149 kDa	49846	21923
64	Ribosomal L1 domain-containing protein 1	RSL1D1	sp|O76021|RL1D1_HUMAN	55 kDa	288340	384750
65	40S ribosomal protein S3	RPS3	sp|P23396|RS3_HUMAN	27 kDa	4084900	3196900
66	T-complex protein 1 subunit epsilon	CCT5	sp|P48643|TCPE_HUMAN	60 kDa	192780	132250
67	Eukaryotic initiation factor 4A-I	EIF4A1	sp|P60842|IF4A1_HUMAN	46 kDa	152590	84886
68	40S ribosomal protein S3a	RPS3A	sp|P61247|RS3A_HUMAN	30 kDa	0	176660
69	Isoform 2 of 60S ribosomal protein L18	RPL18	sp|Q07020-2|RL18_HUMAN	18 kDa	25739000	7345000
70	Cluster of E3 SUMO-protein ligase RanBP2	RANBP2	sp|P49792|RBP2_HUMAN	358 kDa	0	0
71	Isoform 2 of Eukaryotic translation initiation factor 3 subunit A	EIF3A	sp|Q14152-2|EIF3A_HUMAN	163 kDa	36727	1945.8
72	Ribosome biogenesis protein BMS1 homolog	BMS1	sp|Q14692|BMS1_HUMAN	146 kDa	37276	8985.1
73	Isoform 2 of RNA cytidine acetyltransferase	NAT10	sp|Q9H0A0-2|NAT10_HUMAN	107 kDa	55517	0
74	Cluster of Isoform 2 of ATPase family AAA domain-containing protein 3A	ATAD3A	sp|Q9NVI7-2|ATD3A_HUMAN	66 kDa	90139	26617
75	Isoform 5 of AP-3 complex subunit delta-1	AP3D1	sp|O14617-5|AP3D1_HUMAN	137 kDa	0	13902
76	ATP synthase subunit alpha, mitochondrial	ATP5F1A	sp|P25705|ATPA_HUMAN	60 kDa	79814	43675
77	Isoform 2 of T-complex protein 1 subunit theta	CCT8	sp|P50990-2|TCPQ_HUMAN	58 kDa	24469	149720
78	Nucleolar protein 58	NOP58	sp|Q9Y2X3|NOP58_HUMAN	60 kDa	185920	717390
79	X-ray repair cross-complementing protein 5	XRCC5	sp|P13010|XRCC5_HUMAN	83 kDa	30536	6257.4
80	60S ribosomal protein L9	RPL9	sp|P32969|RL9_HUMAN	22 kDa	397670	213000
81	T-complex protein 1 subunit zeta	CCT6A	sp|P40227|TCPZ_HUMAN	58 kDa	50292	68859
82	Cluster of Elongation factor 1-alpha 1	EEF1A1	sp|P68104|EF1A1_HUMAN	50 kDa	838750	1501500
83	Isoform 2 of Vigilin	HDLBP	sp|Q00341-2|VIGLN_HUMAN	138 kDa	1161.1	45671
84	Isoform 2 of Eukaryotic translation initiation factor 3 subunit D	EIF3D	sp|O15371-2|EIF3D_HUMAN	58 kDa	0	80966
85	Isoform 2 of Nucleophosmin	NPM1	sp|P06748-2|NPM_HUMAN	29 kDa	266600	1033400
86	Isoform J of Protein SON	SON	sp|P18583-10|SON_HUMAN	248 kDa	59389	29826
87	Cluster of Cofilin-1	CFL1	sp|P23528|COF1_HUMAN	19 kDa	99429	514390
88	60S ribosomal protein L13	RPL13	sp|P26373|RL13_HUMAN	24 kDa	16001000	6562300
89	Isoform 2 of T-complex protein 1 subunit gamma	CCT3	sp|P49368-2|TCPG_HUMAN	56 kDa	11853	5971.1
90	Isoform Short of Delta-1-pyrroline-5-carboxylate synthase	ALDH18A1	sp|P54886-2|P5CS_HUMAN	87 kDa	22685	42891
91	Casein kinase II subunit alpha	CSNK2A1	sp|P68400|CSK21_HUMAN	45 kDa	0	29618
92	Isoform 2 of Ubiquitin-associated protein 2-like	UBAP2L	sp|Q14157-1|UBP2L_HUMAN	104 kDa	49010	108040
93	Cullin-associated NEDD8-dissociated protein 1	CAND1	sp|Q86VP6|CAND1_HUMAN	136 kDa	35061	0
94	Nucleolar protein 56	NOP56	sp|O00567|NOP56_HUMAN	66 kDa	72494	94777
95	60S ribosomal protein L10	RPL10	sp|P27635|RL10_HUMAN	25 kDa	505910	334320
96	Isoform 2 of Nuclear pore complex protein Nup214	NUP214	sp|P35658-2|NU214_HUMAN	213 kDa	0	0
97	60S ribosomal protein L13a	RPL13A	sp|P40429|RL13A_HUMAN	24 kDa	1517600	1224000
98	60S ribosomal protein L23a	RPL23A	sp|P62750|RL23A_HUMAN	18 kDa	2992900	3110500
99	GTP-binding nuclear protein Ran	RAN	sp|P62826|RAN_HUMAN	24 kDa	738000	1216500
100	Isoform 2 of MIC complex subunit MIC60	IMMT	sp|Q16891-2|MIC60_HUMAN	83 kDa	96839	13748
101	Talin-1	TLN1	sp|Q9Y490|TLN1_HUMAN	270 kDa	0	0
102	Pre-mRNA-splicing factor ATP-dependent RNA helicase DHX15	DHX15	sp|O43143|DHX15_HUMAN	91 kDa	136840	121520
103	Nucleolin	NCL	sp|P19338|NUCL_HUMAN	77 kDa	54035	0
104	Prohibitin	PHB	sp|P35232|PHB_HUMAN	30 kDa	41044	0
105	60S ribosomal protein L14	RPL14	sp|P50914|RL14_HUMAN	23 kDa	14559000	4189600
106	40S ribosomal protein S23	RPS23	sp|P62266|RS23_HUMAN	16 kDa	368990	0
107	40S ribosomal protein S11	RPS11	sp|P62280|RS11_HUMAN	18 kDa	2388400	964480
108	Isoform 2 of RRP12-like protein	RRP12	sp|Q5JTH9-2|RRP12_HUMAN	133 kDa	9380.7	6489
109	eIF-2-alpha kinase activator GCN1	GCN1	sp|Q92616|GCN1_HUMAN	293 kDa	2459.8	425.08
110	Midasin	MDN1	sp|Q9NU22|MDN1_HUMAN	633 kDa	0	0
111	FACT complex subunit SPT16	SUPT16H	sp|Q9Y5B9|SP16H_HUMAN	120 kDa	19835	29605
112	Insulin receptor substrate 4	IRS4	sp|O14654|IRS4_HUMAN	134 kDa	14034	25710
113	Endoplasmic reticulum chaperone BiP	HSPA5	sp|P11021|BIP_HUMAN	72 kDa	3487500	2659900
114	Isoform 3 of 60S ribosomal protein L17	RPL17	sp|P18621-3|RL17_HUMAN	26 kDa	2490500	0
115	60S ribosomal protein L27a	RPL27A	sp|P46776|RL27A_HUMAN	17 kDa	10007000	3433600
116	40S ribosomal protein S16	RPS16	sp|P62249|RS16_HUMAN	16 kDa	1511400	481660
117	60S ribosomal protein L8	RPL8	sp|P62917|RL8_HUMAN	28 kDa	18063000	7545100
118	60S ribosomal protein L18a	RPL18A	sp|Q02543|RL18A_HUMAN	21 kDa	10679000	1580500
119	Cluster of Isoform 2 of Poly(rC)-binding protein 2	PCBP2	sp|Q15366-2|PCBP2_HUMAN	39 kDa	429130	73718
120	Staphylococcal nuclease domain-containing protein 1	SND1	sp|Q7KZF4|SND1_HUMAN	102 kDa	37562	14553
121	ATP-dependent RNA helicase DHX30	DHX30	sp|Q7L2E3|DHX30_HUMAN	134 kDa	0	1742.4
122	Insulin-like growth factor 2 mRNA-binding protein 1	IGF2BP1	sp|Q9NZI8|IF2B1_HUMAN	63 kDa	42852	119990
123	Leucine--tRNA ligase, cytoplasmic	LARS	sp|Q9P2J5|SYLC_HUMAN	134 kDa	0	3915.1
124	PDZ and LIM domain protein 1	PDLIM1	sp|O00151|PDLI1_HUMAN	36 kDa	70196	232190
125	SWI/SNF-related matrix-associated actin-dependent regulator of chromatin subfamily A member 5	SMARCA5	sp|O60264|SMCA5_HUMAN	122 kDa	0	14282
126	Isoform 2 of Structural maintenance of chromosomes protein 2	SMC2	sp|O95347-2|SMC2_HUMAN	125 kDa	611.57	0
127	Tubulin gamma-1 chain	TUBG1	sp|P23258|TBG1_HUMAN	51 kDa	107240	123000
128	DNA replication licensing factor MCM7	MCM7	sp|P33993|MCM7_HUMAN	81 kDa	9703.5	0
129	60S ribosomal protein L5	RPL5	sp|P46777|RL5_HUMAN	34 kDa	367430	78136
130	RNA-binding protein 25	RBM25	sp|P49756|RBM25_HUMAN	100 kDa	0	3562.7
131	60S ribosomal protein L24	RPL24	sp|P83731|RL24_HUMAN	18 kDa	3998400	1694900
132	Calcium homeostasis endoplasmic reticulum protein	CHERP	sp|Q8IWX8|CHERP_HUMAN	104 kDa	18023	56853
133	Isoform 2 of ATP-binding cassette sub-family F member 1	ABCF1	sp|Q8NE71-2|ABCF1_HUMAN	92 kDa	0	22780
134	Isoform 2 of ATP-dependent RNA helicase DDX54	DDX54	sp|Q8TDD1-2|DDX54_HUMAN	99 kDa	67409	0
135	Ribosome-binding protein 1	RRBP1	sp|Q9P2E9|RRBP1_HUMAN	152 kDa	0	101840
136	Developmentally-regulated GTP-binding protein 1	DRG1	sp|Q9Y295|DRG1_HUMAN	41 kDa	50952	35102
137	Exportin-1	XPO1	sp|O14980|XPO1_HUMAN	123 kDa	7313.2	0
138	26S proteasome non-ATPase regulatory subunit 3	PSMD3	sp|O43242|PSMD3_HUMAN	61 kDa	142940	0
139	Isoform 1 of Core histone macro-H2A.1	H2AFY	sp|O75367-2|H2AY_HUMAN	39 kDa	0	253820
140	Isoform 6 of Microtubule-associated protein 4	MAP4	sp|P27816-6|MAP4_HUMAN	120 kDa	58636	0
141	Isoform 2 of ATP-binding cassette sub-family D member 3	ABCD3	sp|P28288-2|ABCD3_HUMAN	63 kDa	59515	0
142	60S ribosomal protein L22	RPL22	sp|P35268|RL22_HUMAN	15 kDa	2098500	291160
143	Isoform 2 of Probable 28S rRNA (cytosine(4447)-C(5))-methyltransferase	NOP2	sp|P46087-2|NOP2_HUMAN	89 kDa	47324	21205
144	Ras GTPase-activating-like protein IQGAP1	IQGAP1	sp|P46940|IQGA1_HUMAN	189 kDa	2352.1	0
145	60S ribosomal protein L15	RPL15	sp|P61313|RL15_HUMAN	24 kDa	1013700	1393800
146	40S ribosomal protein S15a	RPS15A	sp|P62244|RS15A_HUMAN	15 kDa	372970	138390
147	40S ribosomal protein S14	RPS14	sp|P62263|RS14_HUMAN	16 kDa	15848000	6681200
148	40S ribosomal protein S13	RPS13	sp|P62277|RS13_HUMAN	17 kDa	94027	0
149	60S ribosomal protein L31	RPL31	sp|P62899|RL31_HUMAN	14 kDa	3518600	452980
150	60S ribosomal protein L19	RPL19	sp|P84098|RL19_HUMAN	23 kDa	13447000	1459200
151	Isoform B of Eukaryotic translation initiation factor 4 gamma 1	EIF4G1	sp|Q04637-3|IF4G1_HUMAN	172 kDa	0	7998.8
152	Serine/threonine-protein kinase PRP4 homolog	PRPF4B	sp|Q13523|PRP4B_HUMAN	117 kDa	0	28849
153	Pre-mRNA-processing-splicing factor 8	PRPF8	sp|Q6P2Q9|PRP8_HUMAN	274 kDa	0	3182.7
154	Isoform 2 of E3 ubiquitin-protein ligase RBBP6	RBBP6	sp|Q7Z6E9-2|RBBP6_HUMAN	197 kDa	0	25449
155	Isoform 2 of E3 ubiquitin-protein ligase HUWE1	HUWE1	sp|Q7Z6Z7-2|HUWE1_HUMAN	480 kDa	295.05	0
156	Methylcrotonoyl-CoA carboxylase subunit alpha, mitochondrial	MCCC1	sp|Q96RQ3|MCCA_HUMAN	80 kDa	61104	54475
157	RuvB-like 2	RUVBL2	sp|Q9Y230|RUVB2_HUMAN	51 kDa	0	25164
158	Isoform 2 of Eukaryotic translation initiation factor 5A-1	EIF5A	sp|P63241-2|IF5A1_HUMAN	20 kDa	0	125670
159	Isoform 2 of Structural maintenance of chromosomes flexible hinge domain-containing protein 1	SMCHD1	sp|A6NHR9-2|SMHD1_HUMAN	216 kDa	31448	0
160	Isoform 10 of Fibronectin	FN1	sp|P02751-10|FINC_HUMAN	240 kDa	17527	0
161	Cluster of Histone H2A type 1-B/E	HIST1H2AB	sp|P04908|H2A1B_HUMAN	14 kDa	125450	776170
162	60S ribosomal protein L23	RPL23	sp|P62829|RL23_HUMAN	15 kDa	1070800	411230
163	60S ribosomal protein L32	RPL32	sp|P62910|RL32_HUMAN	16 kDa	2807200	0
164	Nucleolar GTP-binding protein 2	GNL2	sp|Q13823|NOG2_HUMAN	84 kDa	0	0
165	Protein RRP5 homolog	PDCD11	sp|Q14690|RRP5_HUMAN	209 kDa	0	0
166	DnaJ homolog subfamily C member 9	DNAJC9	sp|Q8WXX5|DNJC9_HUMAN	30 kDa	0	9995.5
167	Nuclear pore complex protein Nup205	NUP205	sp|Q92621|NU205_HUMAN	228 kDa	24817	1766.3
168	Isoform 2 of Guanine nucleotide-binding protein-like 3	GNL3	sp|Q9BVP2-2|GNL3_HUMAN	61 kDa	32231	0
169	Isoform 2 of Poly(U)-binding-splicing factor PUF60	PUF60	sp|Q9UHX1-2|PUF60_HUMAN	58 kDa	0	17430
170	Isoform 2 of G patch domain-containing protein 8	GPATCH8	sp|Q9UKJ3-2|GPTC8_HUMAN	155 kDa	0	11320
171	3'-5' RNA helicase YTHDC2	YTHDC2	sp|Q9H6S0|YTDC2_HUMAN	160 kDa	0	0
172	Isoform 2 of Pre-mRNA-processing factor 6	PRPF6	sp|O94906-2|PRP6_HUMAN	102 kDa	41459	0
173	Isoform 2 of Glyceraldehyde-3-phosphate dehydrogenase	GAPDH	sp|P04406-2|G3P_HUMAN	32 kDa	123020	0
174	Isoform 2 of Annexin A2	ANXA2	sp|P07355-2|ANXA2_HUMAN	40 kDa	0	127220
175	Isoform 2 of RNA-binding protein 34	RBM34	sp|P42696-2|RBM34_HUMAN	26 kDa	0	0
176	Elongation factor Tu, mitochondrial	TUFM	sp|P49411|EFTU_HUMAN	50 kDa	43950	0
177	Isoform 2 of T-complex protein 1 subunit delta	CCT4	sp|P50991-2|TCPD_HUMAN	55 kDa	119880	0
178	60S ribosomal protein L27	RPL27	sp|P61353|RL27_HUMAN	16 kDa	2770600	0
179	40S ribosomal protein S7	RPS7	sp|P62081|RS7_HUMAN	22 kDa	0	445680
180	Ras GTPase-activating protein-binding protein 1	G3BP1	sp|Q13283|G3BP1_HUMAN	52 kDa	0	114340
181	Pre-rRNA-processing protein TSR1 homolog	TSR1	sp|Q2NL82|TSR1_HUMAN	92 kDa	34126	19652
182	Isoform 2 of Telomere-associated protein RIF1	RIF1	sp|Q5UIP0-2|RIF1_HUMAN	272 kDa	0	-1
183	Isoform 2 of Zinc finger CCCH-type antiviral protein 1	ZC3HAV1	sp|Q7Z2W4-2|ZCCHV_HUMAN	78 kDa	-1	0
184	ATP-dependent RNA helicase DHX29	DHX29	sp|Q7Z478|DHX29_HUMAN	155 kDa	15106	0
185	Splicing factor 45	RBM17	sp|Q96I25|SPF45_HUMAN	45 kDa	0	47670
186	Isoform 2 of Tyrosine-protein kinase BAZ1B	BAZ1B	sp|Q9UIG0-2|BAZ1B_HUMAN	170 kDa	8635.8	0
187	Isoform 2 of 40S ribosomal protein S24	RPS24	sp|P62847-2|RS24_HUMAN	15 kDa	397140	122090
188	Cluster of 60S ribosomal protein L26	RPL26	sp|P61254|RL26_HUMAN	17 kDa	851160	597180
189	Isoform 2 of Surfeit locus protein 4	SURF4	sp|O15260-2|SURF4_HUMAN	18 kDa	95151	0
190	Isoform 2 of Cold shock domain-containing protein E1	CSDE1	sp|O75534-2|CSDE1_HUMAN	86 kDa	0	13483
191	40S ribosomal protein S27	RPS27	sp|P42677|RS27_HUMAN	9 kDa	2141900	1044800
192	Isoform 1 of Voltage-dependent anion-selective channel protein 2	VDAC2	sp|P45880-1|VDAC2_HUMAN	33 kDa	0	0
193	60S ribosomal protein L21	RPL21	sp|P46778|RL21_HUMAN	19 kDa	765320	0
194	Isoform 2 of Heterogeneous nuclear ribonucleoprotein M	HNRNPM	sp|P52272-2|HNRPM_HUMAN	74 kDa	80277	0
195	Histone H1x	H1FX	sp|Q92522|H1X_HUMAN	22 kDa	0	689160
196	Isoform 2 of Gamma-tubulin complex component 3	TUBGCP3	sp|Q96CW5-2|GCP3_HUMAN	94 kDa	31176	0
197	Isoform 2 of 5'-nucleotidase domain-containing protein 2	NT5DC2	sp|Q9H857-2|NT5D2_HUMAN	64 kDa	0	0
198	Sideroflexin-1	SFXN1	sp|Q9H9B4|SFXN1_HUMAN	36 kDa	67358	0
199	Structural maintenance of chromosomes protein 3	SMC3	sp|Q9UQE7|SMC3_HUMAN	142 kDa	0	0
200	Isoform 2 of Nucleolar GTP-binding protein 1	GTPBP4	sp|Q9BZE4-2|NOG1_HUMAN	68 kDa	45835	0
201	Isoform 2 of Heterogeneous nuclear ribonucleoprotein A/B	HNRNPAB	sp|Q99729-2|ROAA_HUMAN	36 kDa	0	0
202	Cluster of Heterogeneous nuclear ribonucleoprotein H	HNRNPH1	sp|P31943|HNRH1_HUMAN	49 kDa	141860	41855
203	Isoform 2 of Serum albumin	ALB	sp|P02768-2|ALBU_HUMAN	47 kDa	210100	1097200
204	Cluster of ADP-ribosylation factor 3	ARF3	sp|P61204|ARF3_HUMAN	21 kDa	61251	0
205	Isoform 2 of ATP-dependent 6-phosphofructokinase, liver type	PFKL	sp|P17858-2|PFKAL_HUMAN	90 kDa	0	9251.7
206	Stress-70 protein, mitochondrial	HSPA9	sp|P38646|GRP75_HUMAN	74 kDa	0	17373
207	Isoform 2 of Nucleosome assembly protein 1-like 1	NAP1L1	sp|P55209-2|NP1L1_HUMAN	43 kDa	0	597900
208	40S ribosomal protein S18	RPS18	sp|P62269|RS18_HUMAN	18 kDa	0	173120
209	Isoform 3 of Src substrate cortactin	CTTN	sp|Q14247-3|SRC8_HUMAN	57 kDa	79856	0
210	G patch domain-containing protein 4	GPATCH4	sp|Q5T3I0|GPTC4_HUMAN	50 kDa	0	49737
211	Double-stranded RNA-binding protein Staufen homolog 2	STAU2	sp|Q9NUL3|STAU2_HUMAN	63 kDa	0	0
212	Very-long-chain (3R)-3-hydroxyacyl-CoA dehydratase 3	HACD3	sp|Q9P035|HACD3_HUMAN	43 kDa	0	0
213	Splicing factor, proline- and glutamine-rich	SFPQ	sp|P23246|SFPQ_HUMAN	76 kDa	103820	63103
214	Isoform 2 of Transcription intermediary factor 1-beta	TRIM28	sp|Q13263-2|TIF1B_HUMAN	79 kDa	104440	0
215	39S ribosomal protein L23, mitochondrial	MRPL23	sp|Q16540|RM23_HUMAN	18 kDa	0	0
216	Isoform 2 of Nucleoporin NUP188 homolog	NUP188	sp|Q5SRE5-2|NU188_HUMAN	182 kDa	0	4932
217	Isoform 2 of Serine/arginine repetitive matrix protein 1	SRRM1	sp|Q8IYB3-2|SRRM1_HUMAN	102 kDa	0	37163
218	Isoform 2 of Coatomer subunit beta'	COPB2	sp|P35606-2|COPB2_HUMAN	99 kDa	0	3331.3
219	Cluster of Long-chain-fatty-acid--CoA ligase 3	ACSL3	sp|O95573|ACSL3_HUMAN	80 kDa	0	0
220	Isoform 2 of Pescadillo homolog	PES1	sp|O00541-2|PESC_HUMAN	67 kDa	0	35708
221	Isoform 2 of U2 snRNP-associated SURP motif-containing protein	U2SURP	sp|O15042-2|SR140_HUMAN	118 kDa	-1	6481.9
222	Eukaryotic translation initiation factor 2 subunit 3	EIF2S3	sp|P41091|IF2G_HUMAN	51 kDa	0	0
223	Isoform 3 of Exportin-2	CSE1L	sp|P55060-3|XPO2_HUMAN	108 kDa	33103	-1
224	TAR DNA-binding protein 43	TARDBP	sp|Q13148|TADBP_HUMAN	45 kDa	-1	17798
225	Isoform 2 of La-related protein 1	LARP1	sp|Q6PKG0-3|LARP1_HUMAN	116 kDa	0	4835.8
226	Isoform 3 of Multiple myeloma tumor-associated protein 2	MMTAG2	sp|Q9BU76-3|MMTA2_HUMAN	17 kDa	0	63360
227	Isoform 2 of 26S proteasome regulatory subunit 6B	PSMC4	sp|P43686-2|PRS6B_HUMAN	44 kDa	17940	0
228	Isoform Beta-1 of DNA topoisomerase 2-beta	TOP2B	sp|Q02880-2|TOP2B_HUMAN	183 kDa	17716	0
229	60S ribosomal protein L36	RPL36	sp|Q9Y3U8|RL36_HUMAN	12 kDa	1372500	0
230	Endoplasmin	HSP90B1	sp|P14625|ENPL_HUMAN	92 kDa	0	17823
231	ATP-dependent RNA helicase DDX50	DDX50	sp|Q9BQ39|DDX50_HUMAN	83 kDa	143070	0
232	Nuclear pore complex protein Nup155	NUP155	sp|O75694|NU155_HUMAN	155 kDa	1821	0
233	Isoform B of AP-2 complex subunit alpha-1	AP2A1	sp|O95782-2|AP2A1_HUMAN	105 kDa	0	4561.9
234	rRNA 2'-O-methyltransferase fibrillarin	FBL	sp|P22087|FBRL_HUMAN	34 kDa	0	37151
235	Isoform 2 of Ubiquitin-like modifier-activating enzyme 1	UBA1	sp|P22314-2|UBA1_HUMAN	114 kDa	0	0
236	ATP synthase subunit gamma, mitochondrial	ATP5F1C	sp|P36542|ATPG_HUMAN	33 kDa	0	0
237	Isoform 3 of Interleukin-1 receptor-associated kinase 1	IRAK1	sp|P51617-3|IRAK1_HUMAN	75 kDa	0	41848
238	Isoform 2 of Heterogeneous nuclear ribonucleoprotein K	HNRNPK	sp|P61978-2|HNRPK_HUMAN	51 kDa	141070	68963
239	Isoform 2 of 60S ribosomal protein L11	RPL11	sp|P62913-2|RL11_HUMAN	20 kDa	127930	301510
240	Heterogeneous nuclear ribonucleoprotein A0	HNRNPA0	sp|Q13151|ROA0_HUMAN	31 kDa	0	17859
241	Ribosome biogenesis regulatory protein homolog	RRS1	sp|Q15050|RRS1_HUMAN	41 kDa	5547.8	5572.8
242	Nucleolar complex protein 3 homolog	NOC3L	sp|Q8WTT2|NOC3L_HUMAN	93 kDa	0	17588
243	Isoform 3 of Obg-like ATPase 1	OLA1	sp|Q9NTK5-3|OLA1_HUMAN	31 kDa	0	0
244	GMP synthase [glutamine-hydrolyzing]	GMPS	sp|P49915|GUAA_HUMAN	77 kDa	5019.4	0
245	Splicing factor 3B subunit 3	SF3B3	sp|Q15393|SF3B3_HUMAN	136 kDa	0	0
246	Nucleolar pre-ribosomal-associated protein 1	URB1	sp|O60287|NPA1P_HUMAN	254 kDa	0	566.44
247	Protein MB21D2	MB21D2	sp|Q8IYB1|M21D2_HUMAN	56 kDa	-1	0
248	Isoform 2 of Protein SGT1 homolog	SUGT1	sp|Q9Y2Z0-2|SGT1_HUMAN	38 kDa	-1	6280.9
249	Isoform 2 of Heat shock protein 75 kDa, mitochondrial	TRAP1	sp|Q12931-2|TRAP1_HUMAN	74 kDa	0	143540
250	Metastasis-associated protein MTA2	MTA2	sp|O94776|MTA2_HUMAN	75 kDa	22429	-1
251	Heterogeneous nuclear ribonucleoprotein F	HNRNPF	sp|P52597|HNRPF_HUMAN	46 kDa	21120	7400.1
252	Insulin-like growth factor 2 mRNA-binding protein 3	IGF2BP3	sp|O00425|IF2B3_HUMAN	64 kDa	0	61055
253	RNA-binding protein 14	RBM14	sp|Q96PK6|RBM14_HUMAN	69 kDa	55000	0
254	Nascent polypeptide-associated complex subunit alpha, muscle-specific form	NACA	sp|E9PAV3|NACAM_HUMAN	205 kDa	0	0
255	DNA-directed RNA polymerase, mitochondrial	POLRMT	sp|O00411|RPOM_HUMAN	139 kDa	45750	0
256	Eukaryotic translation initiation factor 3 subunit G	EIF3G	sp|O75821|EIF3G_HUMAN	36 kDa	48691	0
257	Isoform Short of Double-stranded RNA-binding protein Staufen homolog 1	STAU1	sp|O95793-2|STAU1_HUMAN	55 kDa	0	0
258	Isoform 2 of Eukaryotic translation initiation factor 4B	EIF4B	sp|P23588-2|IF4B_HUMAN	65 kDa	0	33538
259	Isoform 2 of 60S ribosomal protein L28	RPL28	sp|P46779-2|RL28_HUMAN	18 kDa	3975000	0
260	Isoform 2 of ATP synthase subunit f, mitochondrial	ATP5MF	sp|P56134-2|ATPK_HUMAN	10 kDa	0	0
261	Methionine--tRNA ligase, cytoplasmic	MARS	sp|P56192|SYMC_HUMAN	101 kDa	0	14575
262	40S ribosomal protein S26	RPS26	sp|P62854|RS26_HUMAN	13 kDa	0	125620
263	60S ribosomal protein L30	RPL30	sp|P62888|RL30_HUMAN	13 kDa	1028600	0
264	Isoform 2 of General transcription factor II-I	GTF2I	sp|P78347-2|GTF2I_HUMAN	108 kDa	7435.5	0
265	Isoform B of Phosphate carrier protein, mitochondrial	SLC25A3	sp|Q00325-2|MPCP_HUMAN	40 kDa	1296500	0
266	Chromobox protein homolog 3	CBX3	sp|Q13185|CBX3_HUMAN	21 kDa	210190	0
267	Isoform 2 of YTH domain-containing family protein 2	YTHDF2	sp|Q9Y5A9-2|YTHD2_HUMAN	57 kDa	0	0
268	Eukaryotic translation initiation factor 5B	EIF5B	sp|O60841|IF2P_HUMAN	139 kDa	0	0
269	Isoform 2 of Programmed cell death 6-interacting protein	PDCD6IP	sp|Q8WUM4-2|PDC6I_HUMAN	97 kDa	35409	0
270	Isoform 3 of Protein transport protein Sec61 subunit alpha isoform 1	SEC61A1	sp|P61619-3|S61A1_HUMAN	39 kDa	17927	-1
271	Stomatin-like protein 2, mitochondrial	STOML2	sp|Q9UJZ1|STML2_HUMAN	39 kDa	5993.3	0
272	Isoform 2 of Aspartate--tRNA ligase, cytoplasmic	DARS	sp|P14868-2|SYDC_HUMAN	46 kDa	0	89538
273	Isoform 2 of Histone-binding protein RBBP7	RBBP7	sp|Q16576-2|RBBP7_HUMAN	52 kDa	0	0
274	H/ACA ribonucleoprotein complex subunit DKC1	DKC1	sp|O60832|DKC1_HUMAN	58 kDa	-1	0
275	Isoform A1-A of Heterogeneous nuclear ribonucleoprotein A1	HNRNPA1	sp|P09651-2|ROA1_HUMAN	34 kDa	0	-1
276	Protein kinase C alpha type	PRKCA	sp|P17252|KPCA_HUMAN	77 kDa	-1	0
277	Isoform 2 of CTP synthase 1	CTPS1	sp|P17812-2|PYRG1_HUMAN	41 kDa	10332	-1
278	ADP-ribosylation factor 4	ARF4	sp|P18085|ARF4_HUMAN	21 kDa	0	0
279	Isoform 2 of Elongation factor 1-gamma	EEF1G	sp|P26641-2|EF1G_HUMAN	56 kDa	-1	0
280	Nuclease-sensitive element-binding protein 1	YBX1	sp|P67809|YBOX1_HUMAN	36 kDa	-1	62670
281	Protein LTV1 homolog	LTV1	sp|Q96GA3|LTV1_HUMAN	55 kDa	-1	0
282	Isoform 5 of RNA-binding protein 14	RBM14	sp|Q96PK6-5|RBM14_HUMAN	37 kDa	0	0
283	7-dehydrocholesterol reductase	DHCR7	sp|Q9UBM7|DHCR7_HUMAN	54 kDa	0	-1
284	Isoform A2 of Tight junction protein ZO-2	TJP2	sp|Q9UDY2-2|ZO2_HUMAN	118 kDa	-1	1388.7
285	Isoform 2 of NSFL1 cofactor p47	NSFL1C	sp|Q9UNZ2-4|NSF1C_HUMAN	37 kDa	0	-1
286	Isoform 2 of Serine-threonine kinase receptor-associated protein	STRAP	sp|Q9Y3F4-2|STRAP_HUMAN	40 kDa	-1	35301
287	Isoform p135 of Dynactin subunit 1	DCTN1	sp|Q14203-2|DCTN1_HUMAN	127 kDa	-1	0
288	Isoform 2 of Protein MON2 homolog	MON2	sp|Q7Z3U7-2|MON2_HUMAN	186 kDa	582.83	-1
289	Isoform 2 of Nicalin	NCLN	sp|Q969V3-2|NCLN_HUMAN	63 kDa	0	-1
290	Junction plakoglobin	JUP	sp|P14923|PLAK_HUMAN	82 kDa	1508.8	-1
291	Integrin-linked kinase-associated serine/threonine phosphatase 2C	ILKAP	sp|Q9H0C8|ILKAP_HUMAN	43 kDa	0	-1
292	Transmembrane protein 41B	TMEM41B	sp|Q5BJD5|TM41B_HUMAN	33 kDa	-1	0
293	Very-long-chain 3-oxoacyl-CoA reductase	HSD17B12	sp|Q53GQ0|DHB12_HUMAN	34 kDa	0	-1
294	Isoform 2 of Transcriptional repressor p66-alpha	GATAD2A	sp|Q86YP4-2|P66A_HUMAN	65 kDa	0	-1

## Sheet: 1812XX Data
	#181210_Sokoloski, Samples Report created on 12/18/2018
	Total Spectrum Count
#	Name	Gene Name	Swiss Prot Accession	BioOnly	CapBio
1	NACAM_HUMAN Nascent polypeptide-associated complex subunit alpha, muscle-specific form	NACA	E9PAV3	3	5
2	PDLI1_HUMAN PDZ and LIM domain protein 1	PDLIM1	O00151	6	8
3	MYO1C_HUMAN Isoform 2 of Unconventional myosin-Ic	MYO1C	O00159-2	0	2
4	IF2B3_HUMAN Insulin-like growth factor 2 mRNA-binding protein 3	IGF2BP3	O00425	0	7
5	NOP56_HUMAN Nucleolar protein 56	NOP56	O00567	30	31
6	COPE_HUMAN Isoform 2 of Coatomer subunit epsilon	COPE	O14579-2	0	2
7	IRS4_HUMAN Insulin receptor substrate 4	IRS4	O14654	0	5
8	WDR46_HUMAN WD repeat-containing protein 46	WDR46	O15213	2	5
9	DHX15_HUMAN Pre-mRNA-splicing factor ATP-dependent RNA helicase DHX15	DHX15	O43143	6	10
10	PSMD3_HUMAN 26S proteasome non-ATPase regulatory subunit 3	PSMD3	O43242	0	2
11	SNUT1_HUMAN U4/U6.U5 tri-snRNP-associated protein 1	SART1	O43290	2	0
12	E41L2_HUMAN Band 4.1-like protein 2	EPB41L2	O43491	5	0
13	XPOT_HUMAN Exportin-T	XPOT	O43592	0	2
14	CPSF5_HUMAN Cleavage and polyadenylation specificity factor subunit 5	NUDT21	O43809	2	0
15	SMCA5_HUMAN SWI/SNF-related matrix-associated actin-dependent regulator of chromatin subfamily A member 5	SMARCA5	O60264	9	11
16	DNJA2_HUMAN DnaJ homolog subfamily A member 2	DNAJA2	O60884	0	2
17	PHF2_HUMAN Lysine-specific demethylase PHF2	PHF2	O75151	0	2
18	NDUS7_HUMAN NADH dehydrogenase [ubiquinone] iron-sulfur protein 7, mitochondrial	NDUFS7	O75251	0	2
19	SF3B1_HUMAN Splicing factor 3B subunit 1	SF3B1	O75533	14	5
20	PRKRA_HUMAN Isoform 2 of Interferon-inducible double-stranded RNA-dependent protein kinase activator A	PRKRA	O75569-2	0	2
21	SURF6_HUMAN Surfeit locus protein 6	SURF6	O75683	0	2
22	EIF3G_HUMAN Eukaryotic translation initiation factor 3 subunit G	EIF3G	O75821	0	2
23	RL1D1_HUMAN Ribosomal L1 domain-containing protein 1	RSL1D1	O76021	25	23
24	SRP72_HUMAN Signal recognition particle subunit SRP72	SRP72	O76094	9	12
25	LC7L3_HUMAN Luc7-like protein 3	LUC7L3	O95232	8	6
26	IPO7_HUMAN Importin-7	IPO7	O95373	0	2
27	CD2B2_HUMAN CD2 antigen cytoplasmic tail-binding protein 2	CD2BP2	O95400	7	0
28	AP2A1_HUMAN Isoform B of AP-2 complex subunit alpha-1	AP2A1	O95782-2	0	2
29	STAU1_HUMAN Isoform 3 of Double-stranded RNA-binding protein Staufen homolog 1	STAU1	O95793-3	0	4
30	ACL6A_HUMAN Isoform 2 of Actin-like protein 6A	ACTL6A	O96019-2	0	4
31	ASSY_HUMAN Argininosuccinate synthase	ASS1	P00966	0	2
32	AT1A1_HUMAN Isoform 3 of Sodium/potassium-transporting ATPase subunit alpha-1	ATP1A1	P05023-3	0	3
33	PCCA_HUMAN Isoform 2 of Propionyl-CoA carboxylase alpha chain, mitochondrial	PCCA	P05165-2	0	2
34	ATPB_HUMAN ATP synthase subunit beta, mitochondrial	ATP5F1B	P06576	0	3
35	SRPRA_HUMAN Isoform 2 of Signal recognition particle receptor subunit alpha	SRPRA	P08240-2	0	2
36	PARP1_HUMAN Poly [ADP-ribose] polymerase 1	PARP1	P09874	37	52
37	HSP7C_HUMAN Heat shock cognate 71 kDa protein	HSPA8	P11142	18	20
38	XRCC5_HUMAN X-ray repair cross-complementing protein 5	XRCC5	P13010	3	4
39	K1C10_HUMAN Keratin, type I cytoskeletal 10	KRT10	P13645	52	46
40	ENPL_HUMAN Endoplasmin	HSP90B1	P14625	0	2
41	SYDC_HUMAN Isoform 2 of Aspartate--tRNA ligase, cytoplasmic	DARS	P14868-2	0	2
42	EZRI_HUMAN Ezrin	EZR	P15311	0	4
43	PYRG1_HUMAN Isoform 2 of CTP synthase 1	CTPS1	P17812-2	0	3
44	FBRL_HUMAN rRNA 2'-O-methyltransferase fibrillarin	FBL	P22087	0	2
45	PUR2_HUMAN Trifunctional purine biosynthetic protein adenosine-3	GART	P22102	0	2
46	DNJB1_HUMAN DnaJ homolog subfamily B member 1	DNAJB1	P25685	4	9
47	EF1G_HUMAN Isoform 2 of Elongation factor 1-gamma	EEF1G	P26641-2	0	2
48	RL10_HUMAN 60S ribosomal protein L10	RPL10	P27635	0	2
49	PRDX6_HUMAN Peroxiredoxin-6	PRDX6	P30041	3	3
50	QCR1_HUMAN Cytochrome b-c1 complex subunit 1, mitochondrial	UQCRC1	P31930	0	3
51	HNRH1_HUMAN Heterogeneous nuclear ribonucleoprotein H	HNRNPH1	P31943	5	5
52	PRDX2_HUMAN Peroxiredoxin-2	PRDX2	P32119	3	2
53	RADI_HUMAN Isoform 5 of Radixin	RDX	P35241-5	0	8
54	GRP75_HUMAN Stress-70 protein, mitochondrial	HSPA9	P38646	3	6
55	RL13A_HUMAN 60S ribosomal protein L13a	RPL13A	P40429	2	3
56	LAP2A_HUMAN Lamina-associated polypeptide 2, isoform alpha	TMPO	P42166	8	0
57	RBM34_HUMAN RNA-binding protein 34	RBM34	P42696	5	3
58	MATR3_HUMAN Matrin-3	MATR3	P43243	4	0
59	MSH2_HUMAN DNA mismatch repair protein Msh2	MSH2	P43246	0	3
60	PRS6B_HUMAN Isoform 2 of 26S proteasome regulatory subunit 6B	PSMC4	P43686-2	0	2
61	RAGP1_HUMAN Ran GTPase-activating protein 1	RANGAP1	P46060	6	2
62	RL27A_HUMAN 60S ribosomal protein L27a	RPL27A	P46776	7	9
63	MAP1B_HUMAN Microtubule-associated protein 1B	MAP1B	P46821	27	35
64	MCM2_HUMAN DNA replication licensing factor MCM2	MCM2	P49736	0	2
65	RBM25_HUMAN RNA-binding protein 25	RBM25	P49756	10	10
66	SERPH_HUMAN Serpin H1	SERPINH1	P50454	2	2
67	IRAK1_HUMAN Isoform 2 of Interleukin-1 receptor-associated kinase 1	IRAK1	P51617-2	0	2
68	HNRPF_HUMAN Heterogeneous nuclear ribonucleoprotein F	HNRNPF	P52597	0	3
69	MSH6_HUMAN DNA mismatch repair protein Msh6	MSH6	P52701	0	2
70	MOT1_HUMAN Monocarboxylate transporter 1	SLC16A1	P53985	0	4
71	PSA_HUMAN Puromycin-sensitive aminopeptidase	NPEPPS	P55786	0	2
72	SYMC_HUMAN Methionine--tRNA ligase, cytoplasmic	MARS	P56192	0	5
73	GEMI4_HUMAN Gem-associated protein 4	GEMIN4	P57678	0	2
74	IF4A1_HUMAN Eukaryotic initiation factor 4A-I	EIF4A1	P60842	8	10
75	UBC12_HUMAN NEDD8-conjugating enzyme Ubc12	UBE2M	P61081	0	2
76	ABCE1_HUMAN ATP-binding cassette sub-family E member 1	ABCE1	P61221	2	0
77	RS15A_HUMAN 40S ribosomal protein S15a	RPS15A	P62244	4	4
78	ERF1_HUMAN Eukaryotic peptide chain release factor subunit 1	ETF1	P62495	0	2
79	RL23A_HUMAN 60S ribosomal protein L23a	RPL23A	P62750	36	36
80	RS27A_HUMAN Ubiquitin-40S ribosomal protein S27a	RPS27A	P62979	13	11
81	1433Z_HUMAN 14-3-3 protein zeta/delta	YWHAZ	P63104	2	0
82	IF5A1_HUMAN Isoform 2 of Eukaryotic translation initiation factor 5A-1	EIF5A	P63241-2	0	7
83	RACK1_HUMAN Receptor of activated protein C kinase 1	RACK1	P63244	16	19
84	CSK2B_HUMAN Casein kinase II subunit beta	CSNK2B	P67870	2	2
85	EF1A1_HUMAN Elongation factor 1-alpha 1	EEF1A1	P68104	7	7
86	CSK21_HUMAN Casein kinase II subunit alpha	CSNK2A1	P68400	10	9
87	PRKDC_HUMAN DNA-dependent protein kinase catalytic subunit	PRKDC	P78527	4	25
88	RL36A_HUMAN 60S ribosomal protein L36a	RPL36A	P83881	5	3
89	KNOP1_HUMAN Lysine-rich nucleolar protein 1	KNOP1	Q1ED39	8	7
90	RPA43_HUMAN DNA-directed RNA polymerase I subunit RPA43	TWISTNB	Q3B726	3	0
91	RABL6_HUMAN Rab-like protein 6	RABL6	Q3YEC7	14	17
92	RRP12_HUMAN Isoform 2 of RRP12-like protein	RRP12	Q5JTH9-2	0	4
93	NT5D1_HUMAN 5'-nucleotidase domain-containing protein 1	NT5DC1	Q5TFE4	0	2
94	H2B2C_HUMAN Putative histone H2B type 2-C	HIST2H2BC	Q6DN03	0	2
95	DHX57_HUMAN Putative ATP-dependent RNA helicase DHX57	DHX57	Q6P158	0	2
96	RSBNL_HUMAN Round spermatid basic protein 1-like protein	RSBN1L	Q6PCB5	5	2
97	LARP1_HUMAN Isoform 2 of La-related protein 1	LARP1	Q6PKG0-3	0	7
98	ANR11_HUMAN Ankyrin repeat domain-containing protein 11	ANKRD11	Q6UB99	0	2
99	SND1_HUMAN Staphylococcal nuclease domain-containing protein 1	SND1	Q7KZF4	0	6
100	DHX30_HUMAN Isoform 2 of ATP-dependent RNA helicase DHX30	DHX30	Q7L2E3-2	0	2
101	MEPCE_HUMAN 7SK snRNA methylphosphate capping enzyme	MEPCE	Q7L2J0	2	2
102	ZCCHV_HUMAN Zinc finger CCCH-type antiviral protein 1	ZC3HAV1	Q7Z2W4	3	5
103	EFL1_HUMAN Isoform 2 of Elongation factor-like GTPase 1	EFL1	Q7Z2Z2-2	0	2
104	NUFP2_HUMAN Nuclear fragile X mental retardation-interacting protein 2	NUFIP2	Q7Z417	2	3
105	DHX29_HUMAN ATP-dependent RNA helicase DHX29	DHX29	Q7Z478	8	13
106	CHERP_HUMAN Calcium homeostasis endoplasmic reticulum protein	CHERP	Q8IWX8	4	4
107	DHX37_HUMAN Probable ATP-dependent RNA helicase DHX37	DHX37	Q8IY37	0	2
108	Z280C_HUMAN Zinc finger protein 280C	ZNF280C	Q8ND82	3	0
109	ABCF1_HUMAN ATP-binding cassette sub-family F member 1	ABCF1	Q8NE71	25	26
110	THOC2_HUMAN THO complex subunit 2	THOC2	Q8NI27	14	23
111	SNIP1_HUMAN Smad nuclear-interacting protein 1	SNIP1	Q8TAD8	4	3
112	CHD6_HUMAN Chromodomain-helicase-DNA-binding protein 6	CHD6	Q8TD26	0	2
113	NOC3L_HUMAN Nucleolar complex protein 3 homolog	NOC3L	Q8WTT2	2	2
114	PDC6I_HUMAN Isoform 2 of Programmed cell death 6-interacting protein	PDCD6IP	Q8WUM4-2	0	3
115	BBX_HUMAN HMG box transcription factor BBX	BBX	Q8WY36	0	3
116	DDX50_HUMAN ATP-dependent RNA helicase DDX50	DDX50	Q9BQ39	12	14
117	GRWD1_HUMAN Glutamate-rich WD repeat-containing protein 1	GRWD1	Q9BQ67	0	4
118	MEP50_HUMAN Methylosome protein 50	WDR77	Q9BQA1	4	3
119	RIOK1_HUMAN Serine/threonine-protein kinase RIO1	RIOK1	Q9BRS2	3	5
120	UTP23_HUMAN rRNA-processing protein UTP23 homolog	UTP23	Q9BRU9	2	0
121	DDX23_HUMAN Probable ATP-dependent RNA helicase DDX23	DDX23	Q9BUQ8	0	2
122	NOC4L_HUMAN Nucleolar complex protein 4 homolog	NOC4L	Q9BVI4	2	0
123	MK67I_HUMAN MKI67 FHA domain-interacting nucleolar phosphoprotein	NIFK	Q9BYG3	2	0
124	REXO4_HUMAN RNA exonuclease 4	REXO4	Q9GZR2	2	3
125	DDX24_HUMAN ATP-dependent RNA helicase DDX24	DDX24	Q9GZR7	4	9
126	NAT10_HUMAN RNA cytidine acetyltransferase	NAT10	Q9H0A0	31	37
127	YTDC2_HUMAN 3'-5' RNA helicase YTHDC2	YTHDC2	Q9H6S0	0	4
128	SFR19_HUMAN Splicing factor, arginine/serine-rich 19	SCAF1	Q9H7N4	4	0
129	SFXN1_HUMAN Sideroflexin-1	SFXN1	Q9H9B4	4	3
130	UBP42_HUMAN Isoform 2 of Ubiquitin carboxyl-terminal hydrolase 42	USP42	Q9H9J4-2	0	3
131	RPF1_HUMAN Ribosome production factor 1	RPF1	Q9H9Y2	0	2
132	HEAT1_HUMAN HEAT repeat-containing protein 1	HEATR1	Q9H583	0	3
133	ARMT1_HUMAN Protein-glutamate O-methyltransferase	ARMT1	Q9H993	0	3
134	SSF1_HUMAN Isoform 2 of Suppressor of SWI4 1 homolog	PPAN	Q9NQ55-2	0	4
135	PDLI7_HUMAN Isoform 2 of PDZ and LIM domain protein 7	PDLIM7	Q9NR12-2	0	3
136	DDX21_HUMAN Nucleolar RNA helicase 2	DDX21	Q9NR30	36	59
137	DDX18_HUMAN ATP-dependent RNA helicase DDX18	DDX18	Q9NVP1	17	21
138	PK1IP_HUMAN p21-activated protein kinase-interacting protein 1	PAK1IP1	Q9NWT1	0	2
139	IF2B1_HUMAN Insulin-like growth factor 2 mRNA-binding protein 1	IGF2BP1	Q9NZI8	6	11
140	CPSF2_HUMAN Cleavage and polyadenylation specificity factor subunit 2	CPSF2	Q9P2I0	4	6
141	SYLC_HUMAN Isoform 2 of Leucine--tRNA ligase, cytoplasmic	LARS	Q9P2J5-2	0	6
142	COPG2_HUMAN Coatomer subunit gamma-2	COPG2	Q9UBF2	0	2
143	LIMD1_HUMAN LIM domain-containing protein 1	LIMD1	Q9UGP4	3	0
144	GPTC8_HUMAN Isoform 2 of G patch domain-containing protein 8	GPATCH8	Q9UKJ3-2	0	3
145	PRP19_HUMAN Pre-mRNA-processing factor 19	PRPF19	Q9UMS4	4	2
146	SMC3_HUMAN Structural maintenance of chromosomes protein 3	SMC3	Q9UQE7	0	6
147	RRP44_HUMAN Exosome complex exonuclease RRP44	DIS3	Q9Y2L1	3	5
148	NOP58_HUMAN Nucleolar protein 58	NOP58	Q9Y2X3	21	23
149	SF3B6_HUMAN Splicing factor 3B subunit 6	SF3B6	Q9Y3B4	3	0
150	YTHD2_HUMAN Isoform 2 of YTH domain-containing family protein 2	YTHDF2	Q9Y5A9-2	0	2
151	SP16H_HUMAN FACT complex subunit SPT16	SUPT16H	Q9Y5B9	11	16
152	UBP16_HUMAN Ubiquitin carboxyl-terminal hydrolase 16	USP16	Q9Y5T5	0	2
153	IF2B2_HUMAN Isoform 3 of Insulin-like growth factor 2 mRNA-binding protein 2	IGF2BP2	Q9Y6M1-3	0	5
154	RUVB2_HUMAN RuvB-like 2	RUVBL2	Q9Y230	17	14
155	RUVB1_HUMAN RuvB-like 1	RUVBL1	Q9Y265	17	14
156	COPG1_HUMAN Coatomer subunit gamma-1	COPG1	Q9Y678	2	5
157	PDLI3_HUMAN Isoform 2 of PDZ and LIM domain protein 3	PDLIM3	Q53GG5-2	0	2
158	PEG10_HUMAN Retrotransposon-derived protein PEG10	PEG10	Q86TG7	0	2
159	LYRIC_HUMAN Protein LYRIC	MTDH	Q86UE4	5	14
160	KTN1_HUMAN Isoform 2 of Kinectin	KTN1	Q86UP2-2	0	7
161	CAND1_HUMAN Cullin-associated NEDD8-dissociated protein 1	CAND1	Q86VP6	0	7
162	P5CR2_HUMAN Pyrroline-5-carboxylate reductase 2	PYCR2	Q96C36	0	2
163	CC124_HUMAN Coiled-coil domain-containing protein 124	CCDC124	Q96CT7	0	2
164	KBP_HUMAN KIF1-binding protein	KIF1BP	Q96EK5	0	2
165	TMA16_HUMAN Translation machinery-associated protein 16	TMA16	Q96EY4	4	5
166	EDC3_HUMAN Enhancer of mRNA-decapping protein 3	EDC3	Q96F86	0	2
167	LTV1_HUMAN Protein LTV1 homolog	LTV1	Q96GA3	0	5
168	DDX27_HUMAN Probable ATP-dependent RNA helicase DDX27	DDX27	Q96GQ7	4	6
169	PDLI5_HUMAN PDZ and LIM domain protein 5	PDLIM5	Q96HC4	0	2
170	SPF45_HUMAN Splicing factor 45	RBM17	Q96I25	2	2
171	LCOR_HUMAN Isoform 3 of Ligand-dependent corepressor	LCOR	Q96JN0-3	0	2
172	BT3L4_HUMAN Transcription factor BTF3 homolog 4	BTF3L4	Q96K17	0	2
173	ZN512_HUMAN Isoform 2 of Zinc finger protein 512	ZNF512	Q96ME7-2	0	4
174	MPCP_HUMAN Isoform B of Phosphate carrier protein, mitochondrial	SLC25A3	Q00325-2	0	2
175	RL18A_HUMAN 60S ribosomal protein L18a	RPL18A	Q02543	4	4
176	CEBPZ_HUMAN CCAAT/enhancer-binding protein zeta	CEBPZ	Q03701	3	2
177	PRDX1_HUMAN Peroxiredoxin-1	PRDX1	Q06830	3	2
178	C1QBP_HUMAN Complement component 1 Q subcomponent-binding protein, mitochondrial	C1QBP	Q07021	2	0
179	SSRP1_HUMAN FACT complex subunit SSRP1	SSRP1	Q08945	14	19
180	CPSF1_HUMAN Cleavage and polyadenylation specificity factor subunit 1	CPSF1	Q10570	2	2
181	TBL3_HUMAN Transducin beta-like protein 3	TBL3	Q12788	0	2
182	AIMP1_HUMAN Isoform 2 of Aminoacyl tRNA synthase complex-interacting multifunctional protein 1	AIMP1	Q12904-2	0	3
183	TADBP_HUMAN TAR DNA-binding protein 43	TARDBP	Q13148	0	4
184	AIMP2_HUMAN Aminoacyl tRNA synthase complex-interacting multifunctional protein 2	AIMP2	Q13155	0	2
185	DDX10_HUMAN Probable ATP-dependent RNA helicase DDX10	DDX10	Q13206	0	2
186	TIF1B_HUMAN Transcription intermediary factor 1-beta	TRIM28	Q13263	3	0
187	G3BP1_HUMAN Ras GTPase-activating protein-binding protein 1	G3BP1	Q13283	5	6
188	EIF3I_HUMAN Eukaryotic translation initiation factor 3 subunit I	EIF3I	Q13347	2	0
189	PRP4B_HUMAN Serine/threonine-protein kinase PRP4 homolog	PRPF4B	Q13523	6	3
190	ULA1_HUMAN Isoform 2 of NEDD8-activating enzyme E1 regulatory subunit	NAE1	Q13564-2	0	2
191	DYHC1_HUMAN Cytoplasmic dynein 1 heavy chain 1	DYNC1H1	Q14204	0	5
192	MCM6_HUMAN DNA replication licensing factor MCM6	MCM6	Q14566	0	2
193	TRIPC_HUMAN Isoform 2 of E3 ubiquitin-protein ligase TRIP12	TRIP12	Q14669-2	0	2
194	SMC1A_HUMAN Structural maintenance of chromosomes protein 1A	SMC1A	Q14683	0	2
195	GANAB_HUMAN Neutral alpha-glucosidase AB	GANAB	Q14697	0	2
196	PCBP1_HUMAN Poly(rC)-binding protein 1	PCBP1	Q15365	6	6
197	SF3B4_HUMAN Splicing factor 3B subunit 4	SF3B4	Q15427	3	0
198	MARE2_HUMAN Isoform 3 of Microtubule-associated protein RP/EB family member 2	MAPRE2	Q15555-3	0	2
199	AAAT_HUMAN Isoform 2 of Neutral amino acid transporter B(0)	SLC1A5	Q15758-2	0	2
200	H2A2C_HUMAN Histone H2A type 2-C	HIST2H2AC	Q16777	8	8
201	PSMF1_HUMAN Proteasome inhibitor PI31 subunit	PSMF1	Q92530	0	2
202	GCN1_HUMAN eIF-2-alpha kinase activator GCN1	GCN1	Q92616	0	3
203	NU205_HUMAN Nuclear pore complex protein Nup205	NUP205	Q92621	0	2
204	HDAC2_HUMAN Isoform 2 of Histone deacetylase 2	HDAC2	Q92769-3	0	2
205	DDX17_HUMAN Probable ATP-dependent RNA helicase DDX17	DDX17	Q92841	7	8
206	RENT1_HUMAN Isoform 2 of Regulator of nonsense transcripts 1	UPF1	Q92900-2	0	3
207	SMRC1_HUMAN SWI/SNF complex subunit SMARCC1	SMARCC1	Q92922	7	7
208	SMRD2_HUMAN Isoform 2 of SWI/SNF-related matrix-associated actin-dependent regulator of chromatin subfamily D member 2	SMARCD2	Q92925-2	0	2
209	DNJC7_HUMAN Isoform 2 of DnaJ homolog subfamily C member 7	DNAJC7	Q99615-2	0	2
210	NP1L4_HUMAN Isoform 2 of Nucleosome assembly protein 1-like 4	NAP1L4	Q99733-2	0	11
211	NP1L1_HUMAN Isoform 2 of Nucleosome assembly protein 1-like 1	NAP1L1	P55209-2	2	9
212			SINV-CapsidBioID2	30	135
213	SYRC_HUMAN Isoform Monomeric of Arginine--tRNA ligase, cytoplasmic	RARS	P54136-2	2	8
214	MYH10_HUMAN Isoform 2 of Myosin-10	MYH10	P35580-2	2	8
215	RL31_HUMAN 60S ribosomal protein L31	RPL31 PE	P62899	2	5
216	DRG1_HUMAN Developmentally-regulated GTP-binding protein 1	DRG1 PE	Q9Y295	2	6
217	RL24_HUMAN 60S ribosomal protein L24	RPL24 PE	P83731	7	12
218	BAZ1B_HUMAN Isoform 2 of Tyrosine-protein kinase BAZ1B	BAZ1B	Q9UIG0-2	3	9
219	CHD5_HUMAN Chromodomain-helicase-DNA-binding protein 5	CHD5 PE	Q8TDI0	2	6
220	CHD3_HUMAN Chromodomain-helicase-DNA-binding protein 3	CHD3 PE	Q12873	2	6
221	SYEP_HUMAN Bifunctional glutamate/proline--tRNA ligase	EPRS PE	P07814	5	14
222	RS27_HUMAN 40S ribosomal protein S27	RPS27 PE	P42677	2	5
223	ZO1_HUMAN Tight junction protein ZO-1	TJP1 PE	Q07157	2	5
224	CHD4_HUMAN Chromodomain-helicase-DNA-binding protein 4	CHD4 PE	Q14839	5	12
225	RRP1B_HUMAN Isoform 2 of Ribosomal RNA processing protein 1 homolog B	RRP1B	Q14684-2	3	7
226	DDX54_HUMAN Isoform 2 of ATP-dependent RNA helicase DDX54	DDX54	Q8TDD1-2	3	7
227	PABP1_HUMAN Isoform 2 of Polyadenylate-binding protein 1	PABPC1	P11940-2	3	11
228	NKAP_HUMAN NF-kappa-B-activating protein	NKAP PE	Q8N5F7	3	6
229	RL5_HUMAN 60S ribosomal protein L5	RPL5 PE	P46777	2	4
230	TSR1_HUMAN Pre-rRNA-processing protein TSR1 homolog	TSR1 PE	Q2NL82	5	10
231	TOP2A_HUMAN Isoform 3 of DNA topoisomerase 2-alpha	TOP2A	P11388-3	7	14
232	SLIT2_HUMAN Isoform 2 of Slit homolog 2 protein	SLIT2	O94813-2	6	13
233	PHB_HUMAN Prohibitin	PHB PE	P35232	6	10
234	ABCD3_HUMAN Isoform 2 of ATP-binding cassette sub-family D member 3	ABCD3	P28288-2	2	4
235	BRD9_HUMAN Bromodomain-containing protein 9	BRD9 PE	Q9H8M2	2	4
236	PB1_HUMAN Protein polybromo-1	PBRM1 PE	Q86U86	5	10
237	TCPQ_HUMAN T-complex protein 1 subunit theta	CCT8 PE	P50990	8	14
238	COPA_HUMAN Isoform 2 of Coatomer subunit alpha	COPA	P53621-2	3	6
239	IF4G1_HUMAN Isoform B of Eukaryotic translation initiation factor 4 gamma 1	EIF4G1	Q04637-3	3	6
240	AP3B1_HUMAN Isoform 2 of AP-3 complex subunit beta-1	AP3B1	O00203-3	2	4
241	RRP5_HUMAN Protein RRP5 homolog	PDCD11 PE	Q14690	2	4
242	NOG1_HUMAN Isoform 2 of Nucleolar GTP-binding protein 1	GTPBP4	Q9BZE4-2	3	5
243	RFC1_HUMAN Replication factor C subunit 1	RFC1 PE	P35251	7	13
244	VIGLN_HUMAN Isoform 2 of Vigilin	HDLBP	Q00341-2	5	9
245	ABCF2_HUMAN Isoform 2 of ATP-binding cassette sub-family F member 2	ABCF2	Q9UG63-2	4	7
246	SMCA4_HUMAN Isoform 3 of Transcription activator BRG1	SMARCA4	P51532-3	8	14
247	FAS_HUMAN Fatty acid synthase	FASN PE	P49327	5	9
248	IMA7_HUMAN Importin subunit alpha-7	KPNA6 PE	O60684	2	5
249	TEX10_HUMAN Isoform 2 of Testis-expressed protein 10	TEX10	Q9NXF1-2	3	5
250	NU214_HUMAN Isoform 2 of Nuclear pore complex protein Nup214	NUP214	P35658-2	3	5
251	DDX3X_HUMAN Isoform 2 of ATP-dependent RNA helicase DDX3X	DDX3X	O00571-2	26	42
252	SPB1_HUMAN pre-rRNA processing protein FTSJ3	FTSJ3 PE	Q8IY81	18	27
253	TBA1B_HUMAN Tubulin alpha-1B chain	TUBA1B PE	P68363	34	44
254	AP2M1_HUMAN Isoform 2 of AP-2 complex subunit mu	AP2M1	Q96CW1-2	6	9
255	MBB1A_HUMAN Isoform 2 of Myb-binding protein 1A	MYBBP1A	Q9BQG0-2	16	24
256	HP1B3_HUMAN Isoform 2 of Heterochromatin protein 1-binding protein 3	HP1BP3	Q5SSJ5-2	11	16
257	RS8_HUMAN 40S ribosomal protein S8	RPS8 PE	P62241	39	37
258	ATPG_HUMAN ATP synthase subunit gamma, mitochondrial	ATP5F1C PE	P36542	2	3
259	MOES_HUMAN Moesin	MSN PE	P26038	4	6
260	TCPA_HUMAN T-complex protein 1 subunit alpha	TCP1 PE	P17987	10	14
261	TRAP1_HUMAN Isoform 2 of Heat shock protein 75 kDa, mitochondrial	TRAP1	Q12931-2	4	6
262	IF2B_HUMAN Eukaryotic translation initiation factor 2 subunit 2	EIF2S2 PE	P20042	2	3
263	SNF5_HUMAN Isoform B of SWI/SNF-related matrix-associated actin-dependent regulator of chromatin subfamily B member 1	SMARCB1	Q12824-2	2	3
264	TIM50_HUMAN Isoform 2 of Mitochondrial import inner membrane translocase subunit TIM50	TIMM50	Q3ZCQ8-2	2	3
265	IMA1_HUMAN Importin subunit alpha-1	KPNA2 PE	P52292	2	3
266	SYYC_HUMAN Tyrosine--tRNA ligase, cytoplasmic	YARS PE	P54577	2	3
267	G3P_HUMAN Glyceraldehyde-3-phosphate dehydrogenase	GAPDH PE	P04406	5	7
268	MCM4_HUMAN DNA replication licensing factor MCM4	MCM4 PE	P33991	2	3
269	BMS1_HUMAN Ribosome biogenesis protein BMS1 homolog	BMS1 PE	Q14692	2	3
270	RBBP6_HUMAN Isoform 2 of E3 ubiquitin-protein ligase RBBP6	RBBP6	Q7Z6E9-2	2	3
271	RL7_HUMAN 60S ribosomal protein L7	RPL7 PE	P18124	6	8
272	RS3A_HUMAN 40S ribosomal protein S3a	RPS3A PE	P61247	6	8
273	RL32_HUMAN 60S ribosomal protein L32	RPL32 PE	P62910	3	4
274	PHF6_HUMAN PHD finger protein 6	PHF6 PE	Q8IWS0	6	8
275	BTF3_HUMAN Isoform 2 of Transcription factor BTF3	BTF3	P20290-2	3	4
276	ANM5_HUMAN Protein arginine N-methyltransferase 5	PRMT5 PE	O14744	5	7
277	SYIC_HUMAN Isoleucine--tRNA ligase, cytoplasmic	IARS PE	P41252	5	7
278	RL17_HUMAN Isoform 3 of 60S ribosomal protein L17	RPL17	P18621-3	3	4
279	RS6_HUMAN 40S ribosomal protein S6	RPS6 PE	P62753	10	13
280	TCPZ_HUMAN T-complex protein 1 subunit zeta	CCT6A PE	P40227	6	10
281	RL6_HUMAN 60S ribosomal protein L6	RPL6 PE	Q02878	23	29
282	BUB3_HUMAN Isoform 2 of Mitotic checkpoint protein BUB3	BUB3	O43684-2	3	4
283	CSDE1_HUMAN Isoform 2 of Cold shock domain-containing protein E1	CSDE1	O75534-2	6	8
284	TBG1_HUMAN Tubulin gamma-1 chain	TUBG1 PE	P23258	3	4
285	TCPG_HUMAN Isoform 2 of T-complex protein 1 subunit gamma	CCT3	P49368-2	3	4
286	IF2P_HUMAN Eukaryotic translation initiation factor 5B	EIF5B PE	O60841	39	53
287	RS9_HUMAN 40S ribosomal protein S9	RPS9 PE	P46781	4	5
288	CD11B_HUMAN Isoform 2 of Cyclin-dependent kinase 11B	CDK11B	P21127-3	11	14
289	CLH1_HUMAN Isoform 2 of Clathrin heavy chain 1	CLTC	Q00610-2	3	4
290	RL15_HUMAN 60S ribosomal protein L15	RPL15 PE	P61313	4	5
291	LDHB_HUMAN L-lactate dehydrogenase B chain	LDHB PE	P07195	11	14
292	NSA2_HUMAN Ribosome biogenesis protein NSA2 homolog	NSA2 PE	O95478	4	5
293	DHX9_HUMAN ATP-dependent RNA helicase A	DHX9 PE	Q08211	11	14
294	GPTC4_HUMAN Isoform 3 of G patch domain-containing protein 4	GPATCH4	Q5T3I0-3	4	5
295	PR40A_HUMAN Pre-mRNA-processing factor 40 homolog A	PRPF40A PE	O75400	10	12
296	RS4X_HUMAN 40S ribosomal protein S4, X isoform	RPS4X PE	P62701	5	6
297	S30BP_HUMAN Isoform 2 of SAP30-binding protein	SAP30BP	Q9UHR5-2	5	6
298	RAN_HUMAN GTP-binding nuclear protein Ran	RAN PE	P62826	6	7
299	TOP2B_HUMAN Isoform Beta-1 of DNA topoisomerase 2-beta	TOP2B	Q02880-2	9	11
300	NOP2_HUMAN Probable 28S rRNA (cytosine(4447)-C(5))-methyltransferase	NOP2 PE	P46087	19	21
301	STRAP_HUMAN Isoform 2 of Serine-threonine kinase receptor-associated protein	STRAP	Q9Y3F4-2	6	7
302	RL4_HUMAN 60S ribosomal protein L4	RPL4 PE	P36578	28	44
303	SRPK1_HUMAN Isoform 1 of SRSF protein kinase 1	SRPK1	Q96SB4-3	5	10
304	ARF3_HUMAN ADP-ribosylation factor 3	ARF3 PE	P61204	6	7
305	PHB2_HUMAN Prohibitin-2	PHB2 PE	Q99623	9	10
306	KI67_HUMAN Proliferation marker protein Ki-67	MKI67 PE	P46013	6	7
307	BRD7_HUMAN Isoform 2 of Bromodomain-containing protein 7	BRD7	Q9NPI1-2	7	8
308	NOG2_HUMAN Nucleolar GTP-binding protein 2	GNL2 PE	Q13823	17	19
309	H2AY_HUMAN Isoform 3 of Core histone macro-H2A.1	H2AFY	O75367-3	9	11
310	CDK12_HUMAN Isoform 2 of Cyclin-dependent kinase 12	CDK12	Q9NYV4-2	7	8
311	ADT2_HUMAN ADP/ATP translocase 2	SLC25A5 PE	P05141	10	12
312	HS71A_HUMAN Heat shock 70 kDa protein 1A	HSPA1A PE	P0DMV8	40	51
313	ATPA_HUMAN ATP synthase subunit alpha, mitochondrial	ATP5F1A PE	P25705	11	12
314	EF2_HUMAN Elongation factor 2	EEF2 PE	P13639	10	11
315	SON_HUMAN Protein SON	SON PE	P18583	10	11
316	PUF60_HUMAN Isoform 2 of Poly(U)-binding-splicing factor PUF60	PUF60	Q9UHX1-2	15	15
317	GNL3_HUMAN Isoform 2 of Guanine nucleotide-binding protein-like 3	GNL3	Q9BVP2-2	20	21
318	POP1_HUMAN Ribonucleases P/MRP protein subunit POP1	POP1 PE	Q99575	19	20
319	TAF4_HUMAN Transcription initiation factor TFIID subunit 4	TAF4 PE	O00268	2	2
320	P5CS_HUMAN Isoform Short of Delta-1-pyrroline-5-carboxylate synthase	ALDH18A1	P54886-2	7	7
321	RS26_HUMAN 40S ribosomal protein S26	RPS26 PE	P62854	5	5
322	RL8_HUMAN 60S ribosomal protein L8	RPL8 PE	P62917	4	4
323	XPC_HUMAN DNA repair protein complementing XP-C cells	XPC PE	Q01831	2	2
324	MED19_HUMAN Isoform 2 of Mediator of RNA polymerase II transcription subunit 19	MED19	A0JLT2-2	2	2
325	SURF4_HUMAN Isoform 2 of Surfeit locus protein 4	SURF4	O15260-2	3	3
326	SERA_HUMAN D-3-phosphoglycerate dehydrogenase	PHGDH PE	O43175	3	3
327	LDHA_HUMAN Isoform 3 of L-lactate dehydrogenase A chain	LDHA	P00338-3	13	14
328	TOP1_HUMAN DNA topoisomerase 1	TOP1 PE	P11387	19	19
329	KPYM_HUMAN Pyruvate kinase PKM	PKM PE	P14618	14	14
330	H2AX_HUMAN Histone H2AX	H2AFX PE	P16104	7	7
331	DDX5_HUMAN Isoform 2 of Probable ATP-dependent RNA helicase DDX5	DDX5	P17844-2	4	4
332	RL13_HUMAN 60S ribosomal protein L13	RPL13 PE	P26373	3	3
333	DNJA1_HUMAN Isoform 2 of DnaJ homolog subfamily A member 1	DNAJA1	P31689-2	2	2
334	MCM7_HUMAN DNA replication licensing factor MCM7	MCM7 PE	P33993	8	8
335	RFC2_HUMAN Isoform 2 of Replication factor C subunit 2	RFC2	P35250-2	2	2
336	EFTU_HUMAN Elongation factor Tu, mitochondrial	TUFM PE	P49411	5	5
337	TCPD_HUMAN T-complex protein 1 subunit delta	CCT4 PE	P50991	3	3
338	AFAD_HUMAN Isoform 2 of Afadin	AFDN	P55196-1	3	3
339	RS7_HUMAN 40S ribosomal protein S7	RPS7 PE	P62081	4	3
340	RS16_HUMAN 40S ribosomal protein S16	RPS16 PE	P62249	2	2
341	RS14_HUMAN 40S ribosomal protein S14	RPS14 PE	P62263	3	3
342	RL11_HUMAN Isoform 2 of 60S ribosomal protein L11	RPL11	P62913-2	3	3
343	SMRC2_HUMAN Isoform 2 of SWI/SNF complex subunit SMARCC2	SMARCC2	Q8TAQ2-2	5	5
344	ATX2L_HUMAN Isoform 3 of Ataxin-2-like protein	ATXN2L	Q8WWM7-3	2	2
345	SREK1_HUMAN Isoform 2 of Splicing regulatory glutamine/lysine-rich protein 1	SREK1	Q8WXA9-2	3	3
346	LLPH_HUMAN Protein LLP homolog	LLPH PE	Q9BRT6	2	2
347	JUPI1_HUMAN Isoform 2 of Jupiter microtubule associated homolog 1	JPT1	Q9UK76-2	2	2
348	E41L3_HUMAN Isoform 2 of Band 4.1-like protein 3	EPB41L3	Q9Y2J2-2	3	3
349	TLN1_HUMAN Talin-1	TLN1 PE	Q9Y490	2	2
350	AR6P4_HUMAN Isoform 2 of ADP-ribosylation factor-like protein 6-interacting protein 4	ARL6IP4	Q66PJ3-2	2	2
351	SMCE1_HUMAN Isoform 3 of SWI/SNF-related matrix-associated actin-dependent regulator of chromatin subfamily E member 1	SMARCE1	Q969G3-3	2	2
352	RL18_HUMAN Isoform 2 of 60S ribosomal protein L18	RPL18	Q07020-2	8	11
353	RRS1_HUMAN Ribosome biogenesis regulatory protein homolog	RRS1 PE	Q15050	6	6
354	IF4H_HUMAN Eukaryotic translation initiation factor 4H	EIF4H PE	Q15056	2	2
355	ELAV1_HUMAN Isoform 2 of ELAV-like protein 1	ELAVL1	Q15717-2	2	2
356	ENOA_HUMAN Alpha-enolase	ENO1 PE	P06733	9	9
357	NPM_HUMAN Nucleophosmin	NPM1 PE	P06748	9	9
358	HS90B_HUMAN Heat shock protein HSP 90-beta	HSP90AB1 PE	P08238	15	14
359	IF4B_HUMAN Isoform 2 of Eukaryotic translation initiation factor 4B	EIF4B	P23588-2	2	2
360	TAF6_HUMAN Isoform 3 of Transcription initiation factor TFIID subunit 6	TAF6	P49848-3	2	2
361	RL7A_HUMAN 60S ribosomal protein L7a	RPL7A PE	P62424	35	36
362	RS30_HUMAN 40S ribosomal protein S30	FAU PE	P62861	2	2
363	CENPV_HUMAN Isoform 3 of Centromere protein V	CENPV	Q7Z7K6-3	4	4
364	P66B_HUMAN Transcriptional repressor p66-beta	GATAD2B PE	Q8WXI9	4	4
365	LYAR_HUMAN Cell growth-regulating nucleolar protein	LYAR PE	Q9NX58	15	17
366	H2AW_HUMAN Core histone macro-H2A.2	H2AFY2 PE	Q9P0M6	6	7
367	WAC2C_HUMAN Isoform 2 of WASH complex subunit 2C	WASHC2C	Q9Y4E1-2	2	2
368	ARID2_HUMAN Isoform 2 of AT-rich interactive domain-containing protein 2	ARID2	Q68CP9-3	2	2
369	FMC1_HUMAN Isoform 2 of Protein FMC1 homolog	FMC1	Q96HJ9-2	5	5
370	MCCA_HUMAN Methylcrotonoyl-CoA carboxylase subunit alpha, mitochondrial	MCCC1 PE	Q96RQ3	4	4
371	SRS11_HUMAN Isoform 2 of Serine/arginine-rich splicing factor 11	SRSF11	Q05519-2	4	4
372	CDK13_HUMAN Isoform 2 of Cyclin-dependent kinase 13	CDK13	Q14004-2	3	3
373	RBM39_HUMAN Isoform 3 of RNA-binding protein 39	RBM39	Q14498-3	2	2
374	NUMA1_HUMAN Isoform 2 of Nuclear mitotic apparatus protein 1	NUMA1	Q14980-2	11	11
375	PCH2_HUMAN Pachytene checkpoint protein 2 homolog	TRIP13 PE	Q15645	2	2
376	EBP2_HUMAN Probable rRNA-processing protein EBP2	EBNA1BP2 PE	Q99848	5	5
377	AHSA1_HUMAN Isoform 2 of Activator of 90 kDa heat shock protein ATPase homolog 1	AHSA1	O95433-2	2	2
378	HNRPC_HUMAN Isoform C1 of Heterogeneous nuclear ribonucleoproteins C1/C2	HNRNPC	P07910-2	2	2
379	RS2_HUMAN 40S ribosomal protein S2	RPS2 PE	P15880	5	5
380	PYR1_HUMAN CAD protein	CAD PE	P27708	2	2
381	SYQ_HUMAN Glutamine--tRNA ligase	QARS PE	P47897	4	4
382	COPD_HUMAN Coatomer subunit delta	ARCN1 PE	P48444	3	3
383	NAA40_HUMAN Isoform 2 of N-alpha-acetyltransferase 40	NAA40	Q86UY6-3	2	2
384	FLNC_HUMAN Isoform 2 of Filamin-C	FLNC	Q14315-2	2	2
385	TBB5_HUMAN Tubulin beta chain	TUBB PE	P07437	40	52
386	AP3D1_HUMAN Isoform 5 of AP-3 complex subunit delta-1	AP3D1	O14617-5	32	29
387	TCOF_HUMAN Isoform 3 of Treacle protein	TCOF1	Q13428-3	25	25
388	MYH9_HUMAN Myosin-9	MYH9 PE	P35579	12	11
389	RL3_HUMAN 60S ribosomal protein L3	RPL3 PE	P39023	14	13
390	BAZ2A_HUMAN Isoform 1 of Bromodomain adjacent to zinc finger domain protein 2A	BAZ2A	Q9UIF9-2	8	7
391	UBP2L_HUMAN Isoform 2 of Ubiquitin-associated protein 2-like	UBAP2L	Q14157-1	9	7
392	PYC_HUMAN Pyruvate carboxylase, mitochondrial	PC PE	P11498	16	14
393	SRRM1_HUMAN Isoform 2 of Serine/arginine repetitive matrix protein 1	SRRM1	Q8IYB3-2	7	6
394	ANXA2_HUMAN Isoform 2 of Annexin A2	ANXA2	P07355-2	8	7
395	RS3_HUMAN 40S ribosomal protein S3	RPS3 PE	P23396	9	8
396	SRRM2_HUMAN Isoform 2 of Serine/arginine repetitive matrix protein 2	SRRM2	Q9UQ35-2	8	7
397	FIP1_HUMAN Pre-mRNA 3'-end-processing factor FIP1	FIP1L1 PE	Q6UN15	6	5
398	RL14_HUMAN 60S ribosomal protein L14	RPL14 PE	P50914	12	13
399	RL9_HUMAN 60S ribosomal protein L9	RPL9 PE	P32969	8	7
400	H2B2F_HUMAN Isoform 2 of Histone H2B type 2-F	HIST2H2BF	Q5QNW6-2	25	18
401	BIP_HUMAN Endoplasmic reticulum chaperone BiP	HSPA5 PE	P11021	11	9
402	PUR6_HUMAN Isoform 2 of Multifunctional protein ADE2	PAICS	P22234-2	3	2
403	SRSF1_HUMAN Isoform ASF-2 of Serine/arginine-rich splicing factor 1	SRSF1	Q07955-2	5	5
404	COF1_HUMAN Cofilin-1	CFL1 PE	P23528	6	5
405	RS23_HUMAN 40S ribosomal protein S23	RPS23 PE	P62266	16	42
406	RS24_HUMAN Isoform 2 of 40S ribosomal protein S24	RPS24	P62847-2	12	10
407	TCPE_HUMAN T-complex protein 1 subunit epsilon	CCT5 PE	P48643	9	8
408	PDIA6_HUMAN Isoform 5 of Protein disulfide-isomerase A6	PDIA6	Q15084-5	4	3
409	PCBP2_HUMAN Isoform 2 of Poly(rC)-binding protein 2	PCBP2	Q15366-2	4	3
410	SRC8_HUMAN Src substrate cortactin	CTTN PE	Q14247	8	6
411	ELYS_HUMAN Isoform 2 of Protein ELYS	AHCTF1	Q8WYP5-2	7	5
412	H11_HUMAN Histone H1.1	HIST1H1A PE	Q02539	44	43
413	MMTA2_HUMAN Isoform 4 of Multiple myeloma tumor-associated protein 2	MMTAG2	Q9BU76-4	4	3
414	FLNA_HUMAN Isoform 2 of Filamin-A	FLNA	P21333-2	73	56
415	RS11_HUMAN 40S ribosomal protein S11	RPS11 PE	P62280	4	3
416	RL23_HUMAN 60S ribosomal protein L23	RPL23 PE	P62829	4	3
417	RL22_HUMAN 60S ribosomal protein L22	RPL22 PE	P35268	5	3
418	SMD1_HUMAN Small nuclear ribonucleoprotein Sm D1	SNRPD1 PE	P62314	4	3
419	AT2A2_HUMAN Isoform 2 of Sarcoplasmic/endoplasmic reticulum calcium ATPase 2	ATP2A2	P16615-2	3	2
420	U520_HUMAN U5 small nuclear ribonucleoprotein 200 kDa helicase	SNRNP200 PE	O75643	9	6
421	P66A_HUMAN Isoform 2 of Transcriptional repressor p66-alpha	GATAD2A	Q86YP4-2	3	2
422	TAGL2_HUMAN Isoform 2 of Transgelin-2	TAGLN2	P37802-2	8	6
423	RPA34_HUMAN Isoform 2 of DNA-directed RNA polymerase I subunit RPA34	CD3EAP	O15446-2	3	2
424	U2AF2_HUMAN Isoform 2 of Splicing factor U2AF 65 kDa subunit	U2AF2	P26368-2	3	2
425	BRX1_HUMAN Ribosome biogenesis protein BRX1 homolog	BRIX1 PE	Q8TDN6	3	2
426	K2C1_HUMAN Keratin, type II cytoskeletal 1	KRT1 PE	P04264	69	42
427	RL26_HUMAN 60S ribosomal protein L26	RPL26 PE	P61254	3	3
428	SRSF7_HUMAN Isoform 2 of Serine/arginine-rich splicing factor 7	SRSF7	Q16629-2	3	2
429	H1X_HUMAN Histone H1x	H1FX PE	Q92522	7	4
430	CBX3_HUMAN Chromobox protein homolog 3	CBX3 PE	Q13185	6	4
431	K1C9_HUMAN Keratin, type I cytoskeletal 9	KRT9 PE	P35527	34	21
432	BPTF_HUMAN Isoform 4 of Nucleosome-remodeling factor subunit BPTF	BPTF	Q12830-4	4	2
433	CDK1_HUMAN Cyclin-dependent kinase 1	CDK1 PE	P06493	9	8
434	HNRPU_HUMAN Isoform 2 of Heterogeneous nuclear ribonucleoprotein U	HNRNPU	Q00839-2	4	2
435	VIME_HUMAN Vimentin	VIM PE	P08670	22	13
436	IF2G_HUMAN Eukaryotic translation initiation factor 2 subunit 3	EIF2S3 PE	P41091	4	2
437	ALBU_HUMAN Isoform 2 of Serum albumin	ALB	P02768-2	4	2
438	PP1G_HUMAN Isoform 2 of Serine/threonine-protein phosphatase PP1-gamma catalytic subunit	PPP1CC	P36873-2	9	5
439	K22E_HUMAN Keratin, type II cytoskeletal 2 epidermal	KRT2 PE	P35908	60	33
440	SFPQ_HUMAN Splicing factor, proline- and glutamine-rich	SFPQ PE	P23246	5	2
441	SMHD1_HUMAN Structural maintenance of chromosomes flexible hinge domain-containing protein 1	SMCHD1 PE	A6NHR9	16	6
442	KAP2_HUMAN Isoform 2 of cAMP-dependent protein kinase type II-alpha regulatory subunit	PRKAR2A	P13861-2	7	3
443	HNRPK_HUMAN Isoform 2 of Heterogeneous nuclear ribonucleoprotein K	HNRNPK	P61978-2	5	2
444	ACTG_HUMAN Actin, cytoplasmic 2	ACTG1 PE	P63261	8	5
445	MAP4_HUMAN Isoform 6 of Microtubule-associated protein 4	MAP4	P27816-6	7	2
446	NUCL_HUMAN Nucleolin	NCL PE	P19338	7	2
447	APBB1_HUMAN Isoform 2 of Amyloid-beta A4 precursor protein-binding family B member 1	APBB1	O00213-2	2	0
448	SR140_HUMAN Isoform 2 of U2 snRNP-associated SURP motif-containing protein	U2SURP	O15042-2	2	0
449	PRP4_HUMAN Isoform 2 of U4/U6 small nuclear ribonucleoprotein Prp4	PRPF4	O43172-2	2	0
450	TPD54_HUMAN Isoform 4 of Tumor protein D54	TPD52L2	O43399-4	4	0
451	K1C14_HUMAN Keratin, type I cytoskeletal 14	KRT14 PE	P02533	27	18
452	P53_HUMAN Cellular tumor antigen p53	TP53 PE	P04637	5	0
453	ROA1_HUMAN Isoform A1-A of Heterogeneous nuclear ribonucleoprotein A1	HNRNPA1	P09651-2	3	0
454	KCRB_HUMAN Creatine kinase B-type	CKB PE	P12277	3	0
455	XRCC6_HUMAN Isoform 2 of X-ray repair cross-complementing protein 6	XRCC6	P12956-2	2	0
456	HNRPL_HUMAN Isoform 2 of Heterogeneous nuclear ribonucleoprotein L	HNRNPL	P14866-2	3	0
457	DESP_HUMAN Desmoplakin	DSP PE	P15924	2	0
458	STMN1_HUMAN Isoform 2 of Stathmin	STMN1	P16949-2	2	0
459	QCR2_HUMAN Cytochrome b-c1 complex subunit 2, mitochondrial	UQCRC2 PE	P22695	2	0
460	PTBP1_HUMAN Isoform 2 of Polypyrimidine tract-binding protein 1	PTBP1	P26599-2	2	0
461	STIP1_HUMAN Isoform 3 of Stress-induced-phosphoprotein 1	STIP1	P31948-3	2	0
462	FUS_HUMAN RNA-binding protein FUS	FUS PE	P35637	2	0
463	SYSC_HUMAN Serine--tRNA ligase, cytoplasmic	SARS PE	P49591	2	0
464	NU153_HUMAN Isoform 2 of Nuclear pore complex protein Nup153	NUP153	P49790-2	2	0
465	RBP2_HUMAN E3 SUMO-protein ligase RanBP2	RANBP2 PE	P49792	4	0
466	GUAA_HUMAN Isoform 2 of GMP synthase [glutamine-hydrolyzing]	GMPS	P49915-2	2	0
467	MRE11_HUMAN Isoform 3 of Double-strand break repair protein MRE11	MRE11	P49959-3	7	0
468	HCFC1_HUMAN Isoform 4 of Host cell factor 1	HCFC1	P51610-4	4	0
469	HNRPM_HUMAN Isoform 2 of Heterogeneous nuclear ribonucleoprotein M	HNRNPM	P52272-2	3	0
470	BIEA_HUMAN Biliverdin reductase A	BLVRA PE	P53004	2	0
471	ACLY_HUMAN Isoform 2 of ATP-citrate synthase	ACLY	P53396-2	2	0
472	TERA_HUMAN Transitional endoplasmic reticulum ATPase	VCP PE	P55072	2	0
473	IF6_HUMAN Eukaryotic translation initiation factor 6	EIF6 PE	P56537	2	0
474	1433E_HUMAN Isoform SV of 14-3-3 protein epsilon	YWHAE	P62258-2	3	0
475	H4_HUMAN Histone H4	HIST1H4A PE	P62805	2	0
476	TAF2_HUMAN Transcription initiation factor TFIID subunit 2	TAF2 PE	Q6P1X5	2	0
477	SUGP2_HUMAN Isoform 4 of SURP and G-patch domain-containing protein 2	SUGP2	Q8IX01-4	2	0
478	NSUN2_HUMAN Isoform 2 of tRNA (cytosine(34)-C(5))-methyltransferase	NSUN2	Q08J23-2	3	0
479	PSPC1_HUMAN Isoform 2 of Paraspeckle component 1	PSPC1	Q8WXF1-2	4	0
480	BUD13_HUMAN BUD13 homolog	BUD13 PE	Q9BRD0	3	3
481	ESYT1_HUMAN Isoform 2 of Extended synaptotagmin-1	ESYT1	Q9BSJ8-2	4	0
482	NOL6_HUMAN Nucleolar protein 6	NOL6 PE	Q9H6R4	3	0
483	JUPI2_HUMAN Isoform 3 of Jupiter microtubule associated homolog 2	JPT2	Q9H910-3	2	0
484	HACD3_HUMAN Isoform 2 of Very-long-chain (3R)-3-hydroxyacyl-CoA dehydratase 3	HACD3	Q9P035-2	2	0
485	EP15R_HUMAN Isoform 2 of Epidermal growth factor receptor substrate 15-like 1	EPS15L1	Q9UBC2-2	2	0
486	EI2BD_HUMAN Isoform 2 of Translation initiation factor eIF-2B subunit delta	EIF2B4	Q9UI10-2	2	0
487	NUP50_HUMAN Isoform 2 of Nuclear pore complex protein Nup50	NUP50	Q9UKX7-2	3	0
488	NSF1C_HUMAN Isoform 3 of NSFL1 cofactor p47	NSFL1C	Q9UNZ2-5	4	0
489	NUDC_HUMAN Nuclear migration protein nudC	NUDC PE	Q9Y266	3	0
490	SNUT2_HUMAN Isoform 3 of U4/U6.U5 tri-snRNP-associated protein 2	USP39	Q53GS9-3	2	0
491	DDX42_HUMAN Isoform 2 of ATP-dependent RNA helicase DDX42	DDX42	Q86XP3-2	3	0
492	PGAM5_HUMAN Isoform 2 of Serine/threonine-protein phosphatase PGAM5, mitochondrial	PGAM5	Q96HS1-2	2	0
493	ERBIN_HUMAN Isoform 2 of Erbin	ERBIN	Q96RT1-2	2	0
494	RBM15_HUMAN Isoform 2 of RNA-binding protein 15	RBM15	Q96T37-2	2	0
495	SET_HUMAN Protein SET	SET PE	Q01105	3	0
496	DSG1_HUMAN Desmoglein-1	DSG1 PE	Q02413	2	0
497	EX9_HUMAN Isoform 2 of Exosome complex component RRP45	EXOSC9	Q06265-2	2	0
498	AHNK_HUMAN Neuroblast differentiation-associated protein AHNAK	AHNAK PE	Q09666	2	0
499	ROA0_HUMAN Heterogeneous nuclear ribonucleoprotein A0	HNRNPA0 PE	Q13151	2	0
500	SPTN1_HUMAN Isoform 3 of Spectrin alpha chain, non-erythrocytic 1	SPTAN1	Q13813-3	2	0
501	MDC1_HUMAN Isoform 3 of Mediator of DNA damage checkpoint protein 1	MDC1	Q14676-3	3	0
502	NOLC1_HUMAN Isoform 3 of Nucleolar and coiled-body phosphoprotein 1	NOLC1	Q14978-3	3	0
503	SEPT2_HUMAN Isoform 2 of Septin-2	SEPT2	Q15019-2	2	0
504	NONO_HUMAN Non-POU domain-containing octamer-binding protein	NONO PE	Q15233	8	0
505	SAFB1_HUMAN Isoform 3 of Scaffold attachment factor B1	SAFB	Q15424-3	4	0
506	TAF5_HUMAN Isoform Short of Transcription initiation factor TFIID subunit 5	TAF5	Q15542-2	2	0
507	CPSF6_HUMAN Isoform 2 of Cleavage and polyadenylation specificity factor subunit 6	CPSF6	Q16630-2	3	0
508	SMN_HUMAN Survival motor neuron protein	SMN1 PE	Q16637	2	0
509	PHF3_HUMAN Isoform 2 of PHD finger protein 3	PHF3	Q92576-2	2	0
510	AKAP1_HUMAN Isoform 2 of A-kinase anchor protein 1, mitochondrial	AKAP1	Q92667-2	2	0

## Sheet: Sorted into Groups
	CapBioID Spec					Control Control Spec					Present in Both						CapBioID Spec					Control Control Spec					Present in Both
	#181030_Sokoloski, Samples Report created on 11/13/2018		Quantitative Value (Normalized iBAQ)			#181030_Sokoloski, Samples Report created on 11/13/2018		Quantitative Value (Normalized iBAQ)			#181030_Sokoloski, Samples Report created on 11/13/2018		Quantitative Value (Normalized iBAQ)						Quantitative Value (Normalized iBAQ)					Quantitative Value (Normalized iBAQ)			#181030_Sokoloski, Samples Report created on 11/13/2018		Quantitative Value (Normalized iBAQ)
	Identified Proteins	Gene Name	Bio	CapsidBio		Identified Proteins	Gene Name	Bio	CapsidBio		Identified Proteins	Gene Name	Bio	CapsidBio			Identified Proteins	Gene Name	Bio	CapsidBio		Identified Proteins	Gene Name	Bio	CapsidBio		Identified Proteins	Gene Name	Bio	CapsidBio
	Isoform 2 of Zinc finger CCCH-type antiviral protein 1	ZC3HAV1	-1	0		Isoform 2 of Protein MON2 homolog	MON2	582.83	-1		eIF-2-alpha kinase activator GCN1	GCN1	2459.8	425.08			MYO1C_HUMAN Isoform 2 of Unconventional myosin-Ic	MYO1C	0	2		SNUT1_HUMAN U4/U6.U5 tri-snRNP-associated protein 1	SART1	2	0			SINV-CapsidBioID2	30	135
	Isoform 2 of U2 snRNP-associated SURP motif-containing protein	U2SURP	-1	6481.9		Junction plakoglobin	JUP	1508.8	-1		Nuclear pore complex protein Nup205	NUP205	24817	1766.3			IF2B3_HUMAN Insulin-like growth factor 2 mRNA-binding protein 3	IGF2BP3	0	7		CPSF5_HUMAN Cleavage and polyadenylation specificity factor subunit 5	NUDT21	2	0		DDX21_HUMAN Nucleolar RNA helicase 2	DDX21	36	59
	TAR DNA-binding protein 43	TARDBP	-1	17798		Isoform 2 of CTP synthase 1	CTPS1	10332	-1		Isoform 2 of Eukaryotic translation initiation factor 3 subunit A	EIF3A	36727	1945.8			COPE_HUMAN Isoform 2 of Coatomer subunit epsilon	COPE	0	2		ABCE1_HUMAN ATP-binding cassette sub-family E member 1	ABCE1	2	0		FLNA_HUMAN Isoform 2 of Filamin-A	FLNA	73	56
	Protein MB21D2	MB21D2	-1	0		Isoform 3 of Protein transport protein Sec61 subunit alpha isoform 1	SEC61A1	17927	-1		Isoform 2 of Myosin-10	MYH10	9419.3	2428			IRS4_HUMAN Insulin receptor substrate 4	IRS4	0	5		1433Z_HUMAN 14-3-3 protein zeta/delta	YWHAZ	2	0		IF2P_HUMAN Eukaryotic translation initiation factor 5B	EIF5B PE	39	53
	Isoform 2 of Protein SGT1 homolog	SUGT1	-1	6280.9		Metastasis-associated protein MTA2	MTA2	22429	-1		Ribosome biogenesis regulatory protein homolog	RRS1	5547.8	5572.8			PSMD3_HUMAN 26S proteasome non-ATPase regulatory subunit 3	PSMD3	0	2		UTP23_HUMAN rRNA-processing protein UTP23 homolog	UTP23	2	0		PARP1_HUMAN Poly [ADP-ribose] polymerase 1	PARP1	37	52
	H/ACA ribonucleoprotein complex subunit DKC1	DKC1	-1	0		Isoform 3 of Exportin-2	CSE1L	33103	-1		pre-rRNA processing protein FTSJ3	FTSJ3	25559	5935.1			XPOT_HUMAN Exportin-T	XPOT	0	2		NOC4L_HUMAN Nucleolar complex protein 4 homolog	NOC4L	2	0		TBB5_HUMAN Tubulin beta chain	TUBB PE	40	52
	Protein kinase C alpha type	PRKCA	-1	0		Isoform 2 of E3 ubiquitin-protein ligase HUWE1	HUWE1	295.05	0		Isoform 2 of T-complex protein 1 subunit gamma	CCT3	11853	5971.1			DNJA2_HUMAN DnaJ homolog subfamily A member 2	DNAJA2	0	2		MK67I_HUMAN MKI67 FHA domain-interacting nucleolar phosphoprotein	NIFK	2	0		HS71A_HUMAN Heat shock 70 kDa protein 1A	HSPA1A PE	40	51
	Isoform 2 of Elongation factor 1-gamma	EEF1G	-1	0		Isoform 2 of Structural maintenance of chromosomes protein 2	SMC2	611.57	0		Isoform 2 of Nuclear mitotic apparatus protein 1	NUMA1	25863	6074.4			PHF2_HUMAN Lysine-specific demethylase PHF2	PHF2	0	2		C1QBP_HUMAN Complement component 1 Q subcomponent-binding protein, mitochondrial	C1QBP	2	0		K1C10_HUMAN Keratin, type I cytoskeletal 10	KRT10	52	46
	Nuclease-sensitive element-binding protein 1	YBX1	-1	62670		Nuclear pore complex protein Nup155	NUP155	1821	0		X-ray repair cross-complementing protein 5	XRCC5	30536	6257.4			NDUS7_HUMAN NADH dehydrogenase [ubiquinone] iron-sulfur protein 7, mitochondrial	NDUFS7	0	2		EIF3I_HUMAN Eukaryotic translation initiation factor 3 subunit I	EIF3I	2	0		RL4_HUMAN 60S ribosomal protein L4	RPL4 PE	28	44
	Protein LTV1 homolog	LTV1	-1	0		Ras GTPase-activating-like protein IQGAP1	IQGAP1	2352.1	0		Isoform 2 of RRP12-like protein	RRP12	9380.7	6489			PRKRA_HUMAN Isoform 2 of Interferon-inducible double-stranded RNA-dependent protein kinase activator A	PRKRA	0	2		APBB1_HUMAN Isoform 2 of Amyloid-beta A4 precursor protein-binding family B member 1	APBB1	2	0		TBA1B_HUMAN Tubulin alpha-1B chain	TUBA1B PE	34	44
	Isoform A2 of Tight junction protein ZO-2	TJP2	-1	1388.7		GMP synthase [glutamine-hydrolyzing]	GMPS	5019.4	0		Heterogeneous nuclear ribonucleoprotein F	HNRNPF	21120	7400.1			SURF6_HUMAN Surfeit locus protein 6	SURF6	0	2		SR140_HUMAN Isoform 2 of U2 snRNP-associated SURP motif-containing protein	U2SURP	2	0		H11_HUMAN Histone H1.1	HIST1H1A PE	44	43
	Isoform 2 of Serine-threonine kinase receptor-associated protein	STRAP	-1	35301		Stomatin-like protein 2, mitochondrial	STOML2	5993.3	0		Neuroblast differentiation-associated protein AHNAK	AHNAK	7903.2	8122.4			EIF3G_HUMAN Eukaryotic translation initiation factor 3 subunit G	EIF3G	0	2		PRP4_HUMAN Isoform 2 of U4/U6 small nuclear ribonucleoprotein Prp4	PRPF4	2	0		RS23_HUMAN 40S ribosomal protein S23	RPS23 PE	16	42
	Isoform p135 of Dynactin subunit 1	DCTN1	-1	0		Exportin-1	XPO1	7313.2	0		Ribosome biogenesis protein BMS1 homolog	BMS1	37276	8985.1			IPO7_HUMAN Importin-7	IPO7	0	2		XRCC6_HUMAN Isoform 2 of X-ray repair cross-complementing protein 6	XRCC6	2	0		DDX3X_HUMAN Isoform 2 of ATP-dependent RNA helicase DDX3X	DDX3X	26	42
	Transmembrane protein 41B	TMEM41B	-1	0		Isoform 2 of General transcription factor II-I	GTF2I	7435.5	0		Cytoplasmic dynein 1 heavy chain 1	DYNC1H1	26356	12192			AP2A1_HUMAN Isoform B of AP-2 complex subunit alpha-1	AP2A1	0	2		DESP_HUMAN Desmoplakin	DSP PE	2	0		K2C1_HUMAN Keratin, type II cytoskeletal 1	KRT1 PE	69	42
	Myosin-9	MYH9	0	17042		Isoform 2 of Tyrosine-protein kinase BAZ1B	BAZ1B	8635.8	0		Isoform 2 of MIC complex subunit MIC60	IMMT	96839	13748			STAU1_HUMAN Isoform 3 of Double-stranded RNA-binding protein Staufen homolog 1	STAU1	0	4		STMN1_HUMAN Isoform 2 of Stathmin	STMN1	2	0		NAT10_HUMAN RNA cytidine acetyltransferase	NAT10	31	37
	40S ribosomal protein S3a	RPS3A	0	176660		DNA replication licensing factor MCM7	MCM7	9703.5	0		Cluster of Isoform 3 of L-lactate dehydrogenase A chain	LDHA	238070	14483			ACL6A_HUMAN Isoform 2 of Actin-like protein 6A	ACTL6A	0	4		QCR2_HUMAN Cytochrome b-c1 complex subunit 2, mitochondrial	UQCRC2 PE	2	0		RS8_HUMAN 40S ribosomal protein S8	RPS8 PE	39	37
	Cluster of E3 SUMO-protein ligase RanBP2	RANBP2	0	0		ATP-dependent RNA helicase DHX29	DHX29	15106	0		Staphylococcal nuclease domain-containing protein 1	SND1	37562	14553			ASSY_HUMAN Argininosuccinate synthase	ASS1	0	2		PTBP1_HUMAN Isoform 2 of Polypyrimidine tract-binding protein 1	PTBP1	2	0		RL7A_HUMAN 60S ribosomal protein L7a	RPL7A PE	35	36
	Isoform 5 of AP-3 complex subunit delta-1	AP3D1	0	13902		Isoform 10 of Fibronectin	FN1	17527	0		Elongation factor 2	EEF2	109190	17367			AT1A1_HUMAN Isoform 3 of Sodium/potassium-transporting ATPase subunit alpha-1	ATP1A1	0	3		STIP1_HUMAN Isoform 3 of Stress-induced-phosphoprotein 1	STIP1	2	0		RL23A_HUMAN 60S ribosomal protein L23a	RPL23A	36	36
	Isoform 2 of Eukaryotic translation initiation factor 3 subunit D	EIF3D	0	80966		Isoform Beta-1 of DNA topoisomerase 2-beta	TOP2B	17716	0		Pre-rRNA-processing protein TSR1 homolog	TSR1	34126	19652			PCCA_HUMAN Isoform 2 of Propionyl-CoA carboxylase alpha chain, mitochondrial	PCCA	0	2		FUS_HUMAN RNA-binding protein FUS	FUS PE	2	0		MAP1B_HUMAN Microtubule-associated protein 1B	MAP1B	27	35
	Casein kinase II subunit alpha	CSNK2A1	0	29618		Isoform 2 of 26S proteasome regulatory subunit 6B	PSMC4	17940	0		Isoform 2 of Probable 28S rRNA (cytosine(4447)-C(5))-methyltransferase	NOP2	47324	21205			ATPB_HUMAN ATP synthase subunit beta, mitochondrial	ATP5F1B	0	3		SYSC_HUMAN Serine--tRNA ligase, cytoplasmic	SARS PE	2	0		K22E_HUMAN Keratin, type II cytoskeletal 2 epidermal	KRT2 PE	60	33
	Isoform 2 of Nuclear pore complex protein Nup214	NUP214	0	0		Isoform 2 of Gamma-tubulin complex component 3	TUBGCP3	31176	0		Isoform 2 of Myb-binding protein 1A	MYBBP1A	49846	21923			SRPRA_HUMAN Isoform 2 of Signal recognition particle receptor subunit alpha	SRPRA	0	2		NU153_HUMAN Isoform 2 of Nuclear pore complex protein Nup153	NUP153	2	0		NOP56_HUMAN Nucleolar protein 56	NOP56	30	31
	Talin-1	TLN1	0	0		Isoform 2 of Structural maintenance of chromosomes flexible hinge domain-containing protein 1	SMCHD1	31448	0		Insulin receptor substrate 4	IRS4	14034	25710			ENPL_HUMAN Endoplasmin	HSP90B1	0	2		GUAA_HUMAN Isoform 2 of GMP synthase [glutamine-hydrolyzing]	GMPS	2	0		RL6_HUMAN 60S ribosomal protein L6	RPL6 PE	23	29
	Midasin	MDN1	0	0		Isoform 2 of Guanine nucleotide-binding protein-like 3	GNL3	32231	0		Fatty acid synthase	FASN	49121	25955			SYDC_HUMAN Isoform 2 of Aspartate--tRNA ligase, cytoplasmic	DARS	0	2		BIEA_HUMAN Biliverdin reductase A	BLVRA PE	2	0		AP3D1_HUMAN Isoform 5 of AP-3 complex subunit delta-1	AP3D1	32	29
	ATP-dependent RNA helicase DHX30	DHX30	0	1742.4		Cullin-associated NEDD8-dissociated protein 1	CAND1	35061	0		Cluster of Isoform 2 of ATPase family AAA domain-containing protein 3A	ATAD3A	90139	26617			EZRI_HUMAN Ezrin	EZR	0	4		ACLY_HUMAN Isoform 2 of ATP-citrate synthase	ACLY	2	0		SPB1_HUMAN pre-rRNA processing protein FTSJ3	FTSJ3 PE	18	27
	Leucine--tRNA ligase, cytoplasmic	LARS	0	3915.1		Isoform 2 of Programmed cell death 6-interacting protein	PDCD6IP	35409	0		Bifunctional glutamate/proline--tRNA ligase	EPRS	25789	29410			PYRG1_HUMAN Isoform 2 of CTP synthase 1	CTPS1	0	3		TERA_HUMAN Transitional endoplasmic reticulum ATPase	VCP PE	2	0		ABCF1_HUMAN ATP-binding cassette sub-family F member 1	ABCF1	25	26
	SWI/SNF-related matrix-associated actin-dependent regulator of chromatin subfamily A member 5	SMARCA5	0	14282		Prohibitin	PHB	41044	0		FACT complex subunit SPT16	SUPT16H	19835	29605			FBRL_HUMAN rRNA 2'-O-methyltransferase fibrillarin	FBL	0	2		IF6_HUMAN Eukaryotic translation initiation factor 6	EIF6 PE	2	0		PRKDC_HUMAN DNA-dependent protein kinase catalytic subunit	PRKDC	4	25
	RNA-binding protein 25	RBM25	0	3562.7		Isoform 2 of Pre-mRNA-processing factor 6	PRPF6	41459	0		Isoform J of Protein SON	SON	59389	29826			PUR2_HUMAN Trifunctional purine biosynthetic protein adenosine-3	GART	0	2		H4_HUMAN Histone H4	HIST1H4A PE	2	0		TCOF_HUMAN Isoform 3 of Treacle protein	TCOF1	25	25
	Isoform 2 of ATP-binding cassette sub-family F member 1	ABCF1	0	22780		Elongation factor Tu, mitochondrial	TUFM	43950	0		Developmentally-regulated GTP-binding protein 1	DRG1	50952	35102			EF1G_HUMAN Isoform 2 of Elongation factor 1-gamma	EEF1G	0	2		TAF2_HUMAN Transcription initiation factor TFIID subunit 2	TAF2 PE	2	0		MBB1A_HUMAN Isoform 2 of Myb-binding protein 1A	MYBBP1A	16	24
	Ribosome-binding protein 1	RRBP1	0	101840		DNA-directed RNA polymerase, mitochondrial	POLRMT	45750	0		ATP-dependent RNA helicase A	DHX9	165840	39012			RL10_HUMAN 60S ribosomal protein L10	RPL10	0	2		SUGP2_HUMAN Isoform 4 of SURP and G-patch domain-containing protein 2	SUGP2	2	0		THOC2_HUMAN THO complex subunit 2	THOC2	14	23
	Isoform 1 of Core histone macro-H2A.1	H2AFY	0	253820		Isoform 2 of Nucleolar GTP-binding protein 1	GTPBP4	45835	0		Cluster of Heterogeneous nuclear ribonucleoprotein H	HNRNPH1	141860	41855			QCR1_HUMAN Cytochrome b-c1 complex subunit 1, mitochondrial	UQCRC1	0	3		JUPI2_HUMAN Isoform 3 of Jupiter microtubule associated homolog 2	JPT2	2	0		NOP58_HUMAN Nucleolar protein 58	NOP58	21	23
	Isoform B of Eukaryotic translation initiation factor 4 gamma 1	EIF4G1	0	7998.8		Eukaryotic translation initiation factor 3 subunit G	EIF3G	48691	0		Isoform Short of Delta-1-pyrroline-5-carboxylate synthase	ALDH18A1	22685	42891			RADI_HUMAN Isoform 5 of Radixin	RDX	0	8		HACD3_HUMAN Isoform 2 of Very-long-chain (3R)-3-hydroxyacyl-CoA dehydratase 3	HACD3	2	0		RL1D1_HUMAN Ribosomal L1 domain-containing protein 1	RSL1D1	25	23
	Serine/threonine-protein kinase PRP4 homolog	PRPF4B	0	28849		Nucleolin	NCL	54035	0		ATP synthase subunit alpha, mitochondrial	ATP5F1A	79814	43675			MSH2_HUMAN DNA mismatch repair protein Msh2	MSH2	0	3		EP15R_HUMAN Isoform 2 of Epidermal growth factor receptor substrate 15-like 1	EPS15L1	2	0		DDX18_HUMAN ATP-dependent RNA helicase DDX18	DDX18	17	21
	Pre-mRNA-processing-splicing factor 8	PRPF8	0	3182.7		RNA-binding protein 14	RBM14	55000	0		Isoform 2 of Coatomer subunit alpha	COPA	23621	44313			PRS6B_HUMAN Isoform 2 of 26S proteasome regulatory subunit 6B	PSMC4	0	2		EI2BD_HUMAN Isoform 2 of Translation initiation factor eIF-2B subunit delta	EIF2B4	2	0		NOP2_HUMAN Probable 28S rRNA (cytosine(4447)-C(5))-methyltransferase	NOP2 PE	19	21
	Isoform 2 of E3 ubiquitin-protein ligase RBBP6	RBBP6	0	25449		Isoform 2 of RNA cytidine acetyltransferase	NAT10	55517	0		Isoform 2 of Vigilin	HDLBP	1161.1	45671			MCM2_HUMAN DNA replication licensing factor MCM2	MCM2	0	2		SNUT2_HUMAN Isoform 3 of U4/U6.U5 tri-snRNP-associated protein 2	USP39	2	0		GNL3_HUMAN Isoform 2 of Guanine nucleotide-binding protein-like 3	GNL3	20	21
	RuvB-like 2	RUVBL2	0	25164		Isoform 6 of Microtubule-associated protein 4	MAP4	58636	0		Methylcrotonoyl-CoA carboxylase subunit alpha, mitochondrial	MCCC1	61104	54475			IRAK1_HUMAN Isoform 2 of Interleukin-1 receptor-associated kinase 1	IRAK1	0	2		PGAM5_HUMAN Isoform 2 of Serine/threonine-protein phosphatase PGAM5, mitochondrial	PGAM5	2	0		K1C9_HUMAN Keratin, type I cytoskeletal 9	KRT9 PE	34	21
	Isoform 2 of Eukaryotic translation initiation factor 5A-1	EIF5A	0	125670		Isoform 2 of ATP-binding cassette sub-family D member 3	ABCD3	59515	0		Calcium homeostasis endoplasmic reticulum protein	CHERP	18023	56853			HNRPF_HUMAN Heterogeneous nuclear ribonucleoprotein F	HNRNPF	0	3		ERBIN_HUMAN Isoform 2 of Erbin	ERBIN	2	0		HSP7C_HUMAN Heat shock cognate 71 kDa protein	HSPA8	18	20
	Nucleolar GTP-binding protein 2	GNL2	0	0		Cluster of ADP-ribosylation factor 3	ARF3	61251	0		Splicing factor, proline- and glutamine-rich	SFPQ	103820	63103			MSH6_HUMAN DNA mismatch repair protein Msh6	MSH6	0	2		RBM15_HUMAN Isoform 2 of RNA-binding protein 15	RBM15	2	0		POP1_HUMAN Ribonucleases P/MRP protein subunit POP1	POP1 PE	19	20
	Protein RRP5 homolog	PDCD11	0	0		Sideroflexin-1	SFXN1	67358	0		Cluster of Isoform 2 of Clathrin heavy chain 1	CLTC	35612	63205			MOT1_HUMAN Monocarboxylate transporter 1	SLC16A1	0	4		DSG1_HUMAN Desmoglein-1	DSG1 PE	2	0		SSRP1_HUMAN FACT complex subunit SSRP1	SSRP1	14	19
	DnaJ homolog subfamily C member 9	DNAJC9	0	9995.5		Isoform 2 of ATP-dependent RNA helicase DDX54	DDX54	67409	0		T-complex protein 1 subunit zeta	CCT6A	50292	68859			PSA_HUMAN Puromycin-sensitive aminopeptidase	NPEPPS	0	2		EX9_HUMAN Isoform 2 of Exosome complex component RRP45	EXOSC9	2	0		RACK1_HUMAN Receptor of activated protein C kinase 1	RACK1	16	19
	Isoform 2 of Poly(U)-binding-splicing factor PUF60	PUF60	0	17430		Splicing factor 3B subunit 1	SF3B1	70692	0		Isoform 2 of Heterogeneous nuclear ribonucleoprotein K	HNRNPK	141070	68963			SYMC_HUMAN Methionine--tRNA ligase, cytoplasmic	MARS	0	5		AHNK_HUMAN Neuroblast differentiation-associated protein AHNAK	AHNAK PE	2	0		NOG2_HUMAN Nucleolar GTP-binding protein 2	GNL2 PE	17	19
	Isoform 2 of G patch domain-containing protein 8	GPATCH8	0	11320		Isoform 3 of Src substrate cortactin	CTTN	79856	0		Cluster of Cyclin-dependent kinase 1	CDK1	280080	72339			GEMI4_HUMAN Gem-associated protein 4	GEMIN4	0	2		ROA0_HUMAN Heterogeneous nuclear ribonucleoprotein A0	HNRNPA0 PE	2	0		TOP1_HUMAN DNA topoisomerase 1	TOP1 PE	19	19
	3'-5' RNA helicase YTHDC2	YTHDC2	0	0		Isoform 2 of Heterogeneous nuclear ribonucleoprotein M	HNRNPM	80277	0		Cluster of Isoform 2 of Poly(rC)-binding protein 2	PCBP2	429130	73718			UBC12_HUMAN NEDD8-conjugating enzyme Ubc12	UBE2M	0	2		SPTN1_HUMAN Isoform 3 of Spectrin alpha chain, non-erythrocytic 1	SPTAN1	2	0		H2B2F_HUMAN Isoform 2 of Histone H2B type 2-F	HIST2H2BF	25	18
	Isoform 2 of Annexin A2	ANXA2	0	127220		40S ribosomal protein S13	RPS13	94027	0		60S ribosomal protein L5	RPL5	367430	78136			ERF1_HUMAN Eukaryotic peptide chain release factor subunit 1	ETF1	0	2		SEPT2_HUMAN Isoform 2 of Septin-2	SEPT2	2	0		K1C14_HUMAN Keratin, type I cytoskeletal 14	KRT14 PE	27	18
	Isoform 2 of RNA-binding protein 34	RBM34	0	0		Isoform 2 of Surfeit locus protein 4	SURF4	95151	0		DNA-dependent protein kinase catalytic subunit	PRKDC	385730	81463			IF5A1_HUMAN Isoform 2 of Eukaryotic translation initiation factor 5A-1	EIF5A	0	7		TAF5_HUMAN Isoform Short of Transcription initiation factor TFIID subunit 5	TAF5	2	0		RABL6_HUMAN Rab-like protein 6	RABL6	14	17
	40S ribosomal protein S7	RPS7	0	445680		Isoform 2 of Transcription intermediary factor 1-beta	TRIM28	104440	0		Eukaryotic initiation factor 4A-I	EIF4A1	152590	84886			RRP12_HUMAN Isoform 2 of RRP12-like protein	RRP12	0	4		SMN_HUMAN Survival motor neuron protein	SMN1 PE	2	0		LYAR_HUMAN Cell growth-regulating nucleolar protein	LYAR PE	15	17
	Ras GTPase-activating protein-binding protein 1	G3BP1	0	114340		Isoform 2 of T-complex protein 1 subunit delta	CCT4	119880	0		Cluster of Alpha-enolase	ENO1	250970	94392			NT5D1_HUMAN 5'-nucleotidase domain-containing protein 1	NT5DC1	0	2		PHF3_HUMAN Isoform 2 of PHD finger protein 3	PHF3	2	0		SP16H_HUMAN FACT complex subunit SPT16	SUPT16H	11	16
	Isoform 2 of Telomere-associated protein RIF1	RIF1	0	-1		Isoform 2 of Glyceraldehyde-3-phosphate dehydrogenase	GAPDH	123020	0		Nucleolar protein 56	NOP56	72494	94777			H2B2C_HUMAN Putative histone H2B type 2-C	HIST2H2BC	0	2		AKAP1_HUMAN Isoform 2 of A-kinase anchor protein 1, mitochondrial	AKAP1	2	0		HP1B3_HUMAN Isoform 2 of Heterochromatin protein 1-binding protein 3	HP1BP3	11	16
	Splicing factor 45	RBM17	0	47670		26S proteasome non-ATPase regulatory subunit 3	PSMD3	142940	0		Isoform 2 of Ubiquitin-associated protein 2-like	UBAP2L	49010	108040			DHX57_HUMAN Putative ATP-dependent RNA helicase DHX57	DHX57	0	2		RPA43_HUMAN DNA-directed RNA polymerase I subunit RPA43	TWISTNB	3	0		PUF60_HUMAN Isoform 2 of Poly(U)-binding-splicing factor PUF60	PUF60	15	15
	Isoform 2 of Cold shock domain-containing protein E1	CSDE1	0	13483		ATP-dependent RNA helicase DDX50	DDX50	143070	0		Cluster of Isoform C1 of Heterogeneous nuclear ribonucleoproteins C1/C2	HNRNPC	317330	117450			LARP1_HUMAN Isoform 2 of La-related protein 1	LARP1	0	7		Z280C_HUMAN Zinc finger protein 280C	ZNF280C	3	0		LYRIC_HUMAN Protein LYRIC	MTDH	5	14
	Isoform 1 of Voltage-dependent anion-selective channel protein 2	VDAC2	0	0		Chromobox protein homolog 3	CBX3	210190	0		Poly [ADP-ribose] polymerase 1	PARP1	209360	119440			ANR11_HUMAN Ankyrin repeat domain-containing protein 11	ANKRD11	0	2		LIMD1_HUMAN LIM domain-containing protein 1	LIMD1	3	0		SYEP_HUMAN Bifunctional glutamate/proline--tRNA ligase	EPRS PE	5	14
	Histone H1x	H1FX	0	689160		40S ribosomal protein S23	RPS23	368990	0		Insulin-like growth factor 2 mRNA-binding protein 1	IGF2BP1	42852	119990			SND1_HUMAN Staphylococcal nuclease domain-containing protein 1	SND1	0	6		SF3B6_HUMAN Splicing factor 3B subunit 6	SF3B6	3	0		TOP2A_HUMAN Isoform 3 of DNA topoisomerase 2-alpha	TOP2A	7	14
	Isoform 2 of 5'-nucleotidase domain-containing protein 2	NT5DC2	0	0		60S ribosomal protein L21	RPL21	765320	0		Pre-mRNA-splicing factor ATP-dependent RNA helicase DHX15	DHX15	136840	121520			DHX30_HUMAN Isoform 2 of ATP-dependent RNA helicase DHX30	DHX30	0	2		TIF1B_HUMAN Transcription intermediary factor 1-beta	TRIM28	3	0		TCPQ_HUMAN T-complex protein 1 subunit theta	CCT8 PE	8	14
	Structural maintenance of chromosomes protein 3	SMC3	0	0		60S ribosomal protein L30	RPL30	1028600	0		Isoform 2 of 40S ribosomal protein S24	RPS24	397140	122090			EFL1_HUMAN Isoform 2 of Elongation factor-like GTPase 1	EFL1	0	2		SF3B4_HUMAN Splicing factor 3B subunit 4	SF3B4	3	0		SMCA4_HUMAN Isoform 3 of Transcription activator BRG1	SMARCA4	8	14
	Isoform 2 of Heterogeneous nuclear ribonucleoprotein A/B	HNRNPAB	0	0		Isoform B of Phosphate carrier protein, mitochondrial	SLC25A3	1296500	0		Tubulin gamma-1 chain	TUBG1	107240	123000			DHX37_HUMAN Probable ATP-dependent RNA helicase DHX37	DHX37	0	2		ROA1_HUMAN Isoform A1-A of Heterogeneous nuclear ribonucleoprotein A1	HNRNPA1	3	0		TCPA_HUMAN T-complex protein 1 subunit alpha	TCP1 PE	10	14
	Isoform 2 of ATP-dependent 6-phosphofructokinase, liver type	PFKL	0	9251.7		Cluster of Histone H2B type 1-N	HIST1H2BN	1346300	0		Microtubule-associated protein 1B	MAP1B	84562	124090			CHD6_HUMAN Chromodomain-helicase-DNA-binding protein 6	CHD6	0	2		KCRB_HUMAN Creatine kinase B-type	CKB PE	3	0		CD11B_HUMAN Isoform 2 of Cyclin-dependent kinase 11B	CDK11B	11	14
	Stress-70 protein, mitochondrial	HSPA9	0	17373		60S ribosomal protein L36	RPL36	1372500	0		T-complex protein 1 subunit epsilon	CCT5	192780	132250			PDC6I_HUMAN Isoform 2 of Programmed cell death 6-interacting protein	PDCD6IP	0	3		HNRPL_HUMAN Isoform 2 of Heterogeneous nuclear ribonucleoprotein L	HNRNPL	3	0		LDHB_HUMAN L-lactate dehydrogenase B chain	LDHB PE	11	14
	Isoform 2 of Nucleosome assembly protein 1-like 1	NAP1L1	0	597900		Isoform 3 of 60S ribosomal protein L17	RPL17	2490500	0		Isoform 2 of Propionyl-CoA carboxylase beta chain, mitochondrial	PCCB	413980	134630			BBX_HUMAN HMG box transcription factor BBX	BBX	0	3		HNRPM_HUMAN Isoform 2 of Heterogeneous nuclear ribonucleoprotein M	HNRNPM	3	0		DHX9_HUMAN ATP-dependent RNA helicase A	DHX9 PE	11	14
	40S ribosomal protein S18	RPS18	0	173120		60S ribosomal protein L27	RPL27	2770600	0		40S ribosomal protein S15a	RPS15A	372970	138390			GRWD1_HUMAN Glutamate-rich WD repeat-containing protein 1	GRWD1	0	4		1433E_HUMAN Isoform SV of 14-3-3 protein epsilon	YWHAE	3	0		DDX50_HUMAN ATP-dependent RNA helicase DDX50	DDX50	12	14
	G patch domain-containing protein 4	GPATCH4	0	49737		60S ribosomal protein L32	RPL32	2807200	0		Receptor of activated protein C kinase 1	RACK1	546660	147900			DDX23_HUMAN Probable ATP-dependent RNA helicase DDX23	DDX23	0	2		NSUN2_HUMAN Isoform 2 of tRNA (cytosine(34)-C(5))-methyltransferase	NSUN2	3	0		LDHA_HUMAN Isoform 3 of L-lactate dehydrogenase A chain	LDHA	13	14
	Double-stranded RNA-binding protein Staufen homolog 2	STAU2	0	0		Isoform 2 of 60S ribosomal protein L28	RPL28	3975000	0		Isoform 2 of T-complex protein 1 subunit theta	CCT8	24469	149720			YTDC2_HUMAN 3'-5' RNA helicase YTHDC2	YTHDC2	0	4		NOL6_HUMAN Nucleolar protein 6	NOL6 PE	3	0		KPYM_HUMAN Pyruvate kinase PKM	PKM PE	14	14
	Very-long-chain (3R)-3-hydroxyacyl-CoA dehydratase 3	HACD3	0	0							40S ribosomal protein S2	RPS2	1478500	176990			UBP42_HUMAN Isoform 2 of Ubiquitin carboxyl-terminal hydrolase 42	USP42	0	3		NUP50_HUMAN Isoform 2 of Nuclear pore complex protein Nup50	NUP50	3	0		HS90B_HUMAN Heat shock protein HSP 90-beta	HSP90AB1 PE	15	14
	39S ribosomal protein L23, mitochondrial	MRPL23	0	0							Cluster of ADP/ATP translocase 2	SLC25A5	1123900	198030			RPF1_HUMAN Ribosome production factor 1	RPF1	0	2		NUDC_HUMAN Nuclear migration protein nudC	NUDC PE	3	0		PYC_HUMAN Pyruvate carboxylase, mitochondrial	PC PE	16	14
	Isoform 2 of Nucleoporin NUP188 homolog	NUP188	0	4932							Non-POU domain-containing octamer-binding protein	NONO	695290	198650			HEAT1_HUMAN HEAT repeat-containing protein 1	HEATR1	0	3		DDX42_HUMAN Isoform 2 of ATP-dependent RNA helicase DDX42	DDX42	3	0		RUVB2_HUMAN RuvB-like 2	RUVBL2	17	14
	Isoform 2 of Serine/arginine repetitive matrix protein 1	SRRM1	0	37163							T-complex protein 1 subunit alpha	TCP1	35026	205880			ARMT1_HUMAN Protein-glutamate O-methyltransferase	ARMT1	0	3		SET_HUMAN Protein SET	SET PE	3	0		RUVB1_HUMAN RuvB-like 1	RUVBL1	17	14
	Isoform 2 of Coatomer subunit beta'	COPB2	0	3331.3							T-complex protein 1 subunit eta	CCT7	296440	211890			SSF1_HUMAN Isoform 2 of Suppressor of SWI4 1 homolog	PPAN	0	4		MDC1_HUMAN Isoform 3 of Mediator of DNA damage checkpoint protein 1	MDC1	3	0		SLIT2_HUMAN Isoform 2 of Slit homolog 2 protein	SLIT2	6	13
	Cluster of Long-chain-fatty-acid--CoA ligase 3	ACSL3	0	0							60S ribosomal protein L9	RPL9	397670	213000			PDLI7_HUMAN Isoform 2 of PDZ and LIM domain protein 7	PDLIM7	0	3		NOLC1_HUMAN Isoform 3 of Nucleolar and coiled-body phosphoprotein 1	NOLC1	3	0		RFC1_HUMAN Replication factor C subunit 1	RFC1 PE	7	13
	Isoform 2 of Pescadillo homolog	PES1	0	35708							PDZ and LIM domain protein 1	PDLIM1	70196	232190			PK1IP_HUMAN p21-activated protein kinase-interacting protein 1	PAK1IP1	0	2		CPSF6_HUMAN Isoform 2 of Cleavage and polyadenylation specificity factor subunit 6	CPSF6	3	0		DHX29_HUMAN ATP-dependent RNA helicase DHX29	DHX29	8	13
	Eukaryotic translation initiation factor 2 subunit 3	EIF2S3	0	0							Cluster of Heat shock protein HSP 90-beta	HSP90AB1	270490	278750			SYLC_HUMAN Isoform 2 of Leucine--tRNA ligase, cytoplasmic	LARS	0	6		MATR3_HUMAN Matrin-3	MATR3	4	0		RS6_HUMAN 40S ribosomal protein S6	RPS6 PE	10	13
	Isoform 2 of La-related protein 1	LARP1	0	4835.8							Isoform 2 of Propionyl-CoA carboxylase alpha chain, mitochondrial	PCCA	533020	280780			COPG2_HUMAN Coatomer subunit gamma-2	COPG2	0	2		SFR19_HUMAN Splicing factor, arginine/serine-rich 19	SCAF1	4	0		RL14_HUMAN 60S ribosomal protein L14	RPL14 PE	12	13
	Isoform 3 of Multiple myeloma tumor-associated protein 2	MMTAG2	0	63360							60S ribosomal protein L22	RPL22	2098500	291160			GPTC8_HUMAN Isoform 2 of G patch domain-containing protein 8	GPATCH8	0	3		TPD54_HUMAN Isoform 4 of Tumor protein D54	TPD52L2	4	0		RL3_HUMAN 60S ribosomal protein L3	RPL3 PE	14	13
	Endoplasmin	HSP90B1	0	17823							Cluster of Isoform 2 of ATP-dependent RNA helicase DDX3X	DDX3X	1171100	293600			SMC3_HUMAN Structural maintenance of chromosomes protein 3	SMC3	0	6		RBP2_HUMAN E3 SUMO-protein ligase RanBP2	RANBP2 PE	4	0		VIME_HUMAN Vimentin	VIM PE	22	13
	Isoform B of AP-2 complex subunit alpha-1	AP2A1	0	4561.9							Isoform 2 of 60S ribosomal protein L11	RPL11	127930	301510			YTHD2_HUMAN Isoform 2 of YTH domain-containing family protein 2	YTHDF2	0	2		HCFC1_HUMAN Isoform 4 of Host cell factor 1	HCFC1	4	0		CHD4_HUMAN Chromodomain-helicase-DNA-binding protein 4	CHD4 PE	5	12
	rRNA 2'-O-methyltransferase fibrillarin	FBL	0	37151							60S ribosomal protein L10	RPL10	505910	334320			UBP16_HUMAN Ubiquitin carboxyl-terminal hydrolase 16	USP16	0	2		PSPC1_HUMAN Isoform 2 of Paraspeckle component 1	PSPC1	4	0		RL24_HUMAN 60S ribosomal protein L24	RPL24 PE	7	12
	Isoform 2 of Ubiquitin-like modifier-activating enzyme 1	UBA1	0	0							Pyruvate carboxylase, mitochondrial	PC	582620	351270			IF2B2_HUMAN Isoform 3 of Insulin-like growth factor 2 mRNA-binding protein 2	IGF2BP2	0	5		ESYT1_HUMAN Isoform 2 of Extended synaptotagmin-1	ESYT1	4	0		SRP72_HUMAN Signal recognition particle subunit SRP72	SRP72	9	12
	ATP synthase subunit gamma, mitochondrial	ATP5F1C	0	0							Cluster of Probable ATP-dependent RNA helicase DDX5	DDX5	751100	379030			PDLI3_HUMAN Isoform 2 of PDZ and LIM domain protein 3	PDLIM3	0	2		NSF1C_HUMAN Isoform 3 of NSFL1 cofactor p47	NSFL1C	4	0		PR40A_HUMAN Pre-mRNA-processing factor 40 homolog A	PRPF40A PE	10	12
	Isoform 3 of Interleukin-1 receptor-associated kinase 1	IRAK1	0	41848							Ribosomal L1 domain-containing protein 1	RSL1D1	288340	384750			PEG10_HUMAN Retrotransposon-derived protein PEG10	PEG10	0	2		SAFB1_HUMAN Isoform 3 of Scaffold attachment factor B1	SAFB	4	0		ADT2_HUMAN ADP/ATP translocase 2	SLC25A5 PE	10	12
	Heterogeneous nuclear ribonucleoprotein A0	HNRNPA0	0	17859							60S ribosomal protein L23	RPL23	1070800	411230			KTN1_HUMAN Isoform 2 of Kinectin	KTN1	0	7		E41L2_HUMAN Band 4.1-like protein 2	EPB41L2	5	0		ATPA_HUMAN ATP synthase subunit alpha, mitochondrial	ATP5F1A PE	11	12
	Nucleolar complex protein 3 homolog	NOC3L	0	17588							Prohibitin-2	PHB2	423530	452580			CAND1_HUMAN Cullin-associated NEDD8-dissociated protein 1	CAND1	0	7		P53_HUMAN Cellular tumor antigen p53	TP53 PE	5	0		PABP1_HUMAN Isoform 2 of Polyadenylate-binding protein 1	PABPC1	3	11
	Isoform 3 of Obg-like ATPase 1	OLA1	0	0							60S ribosomal protein L31	RPL31	3518600	452980			P5CR2_HUMAN Pyrroline-5-carboxylate reductase 2	PYCR2	0	2		CD2B2_HUMAN CD2 antigen cytoplasmic tail-binding protein 2	CD2BP2	7	0		IF2B1_HUMAN Insulin-like growth factor 2 mRNA-binding protein 1	IGF2BP1	6	11
	Splicing factor 3B subunit 3	SF3B3	0	0							40S ribosomal protein S16	RPS16	1511400	481660			CC124_HUMAN Coiled-coil domain-containing protein 124	CCDC124	0	2		MRE11_HUMAN Isoform 3 of Double-strand break repair protein MRE11	MRE11	7	0		RL18_HUMAN Isoform 2 of 60S ribosomal protein L18	RPL18	8	11
	Nucleolar pre-ribosomal-associated protein 1	URB1	0	566.44							Cluster of Cofilin-1	CFL1	99429	514390			KBP_HUMAN KIF1-binding protein	KIF1BP	0	2		LAP2A_HUMAN Lamina-associated polypeptide 2, isoform alpha	TMPO	8	0		SMCA5_HUMAN SWI/SNF-related matrix-associated actin-dependent regulator of chromatin subfamily A member 5	SMARCA5	9	11
	Isoform 2 of Heat shock protein 75 kDa, mitochondrial	TRAP1	0	143540							Cluster of 60S ribosomal protein L26	RPL26	851160	597180			EDC3_HUMAN Enhancer of mRNA-decapping protein 3	EDC3	0	2		NONO_HUMAN Non-POU domain-containing octamer-binding protein	NONO PE	8	0		TOP2B_HUMAN Isoform Beta-1 of DNA topoisomerase 2-beta	TOP2B	9	11
	Insulin-like growth factor 2 mRNA-binding protein 3	IGF2BP3	0	61055							Nucleolar RNA helicase 2	DDX21	667210	626820			LTV1_HUMAN Protein LTV1 homolog	LTV1	0	5							H2AY_HUMAN Isoform 3 of Core histone macro-H2A.1	H2AFY	9	11
	Nascent polypeptide-associated complex subunit alpha, muscle-specific form	NACA	0	0							Isoform 2 of Heterogeneous nuclear ribonucleoprotein U	HNRNPU	377140	677760			PDLI5_HUMAN PDZ and LIM domain protein 5	PDLIM5	0	2							EF2_HUMAN Elongation factor 2	EEF2 PE	10	11
	Isoform Short of Double-stranded RNA-binding protein Staufen homolog 1	STAU1	0	0							40S ribosomal protein S9	RPS9	3662700	699080			LCOR_HUMAN Isoform 3 of Ligand-dependent corepressor	LCOR	0	2							SON_HUMAN Protein SON	SON PE	10	11
	Isoform 2 of Eukaryotic translation initiation factor 4B	EIF4B	0	33538							Nucleolar protein 58	NOP58	185920	717390			BT3L4_HUMAN Transcription factor BTF3 homolog 4	BTF3L4	0	2							NUMA1_HUMAN Isoform 2 of Nuclear mitotic apparatus protein 1	NUMA1	11	11
	Isoform 2 of ATP synthase subunit f, mitochondrial	ATP5MF	0	0							Cluster of Isoform 2 of Filamin-A	FLNA	2520500	743480			ZN512_HUMAN Isoform 2 of Zinc finger protein 512	ZNF512	0	4							MYH9_HUMAN Myosin-9	MYH9 PE	12	11
	Methionine--tRNA ligase, cytoplasmic	MARS	0	14575							Cluster of 40S ribosomal protein S4, X isoform	RPS4X	3939300	768540			MPCP_HUMAN Isoform B of Phosphate carrier protein, mitochondrial	SLC25A3	0	2							RS27A_HUMAN Ubiquitin-40S ribosomal protein S27a	RPS27A	13	11
	40S ribosomal protein S26	RPS26	0	125620							Cluster of Histone H2A type 1-B/E	HIST1H2AB	125450	776170			TBL3_HUMAN Transducin beta-like protein 3	TBL3	0	2							TSR1_HUMAN Pre-rRNA-processing protein TSR1 homolog	TSR1 PE	5	10
	Isoform 2 of YTH domain-containing family protein 2	YTHDF2	0	0							Cluster of Pyruvate kinase PKM	PKM	825520	879030			AIMP1_HUMAN Isoform 2 of Aminoacyl tRNA synthase complex-interacting multifunctional protein 1	AIMP1	0	3							PB1_HUMAN Protein polybromo-1	PBRM1 PE	5	10
	Eukaryotic translation initiation factor 5B	EIF5B	0	0							40S ribosomal protein S11	RPS11	2388400	964480			TADBP_HUMAN TAR DNA-binding protein 43	TARDBP	0	4							SRPK1_HUMAN Isoform 1 of SRSF protein kinase 1	SRPK1	5	10
	Isoform 2 of Aspartate--tRNA ligase, cytoplasmic	DARS	0	89538							60S ribosomal protein L4	RPL4	12231000	1005500			AIMP2_HUMAN Aminoacyl tRNA synthase complex-interacting multifunctional protein 2	AIMP2	0	2							DHX15_HUMAN Pre-mRNA-splicing factor ATP-dependent RNA helicase DHX15	DHX15	6	10
	Isoform 2 of Histone-binding protein RBBP7	RBBP7	0	0							Isoform 2 of Nucleophosmin	NPM1	266600	1033400			DDX10_HUMAN Probable ATP-dependent RNA helicase DDX10	DDX10	0	2							PHB_HUMAN Prohibitin	PHB PE	6	10
	Isoform A1-A of Heterogeneous nuclear ribonucleoprotein A1	HNRNPA1	0	-1							40S ribosomal protein S27	RPS27	2141900	1044800			ULA1_HUMAN Isoform 2 of NEDD8-activating enzyme E1 regulatory subunit	NAE1	0	2							TCPZ_HUMAN T-complex protein 1 subunit zeta	CCT6A PE	6	10
	ADP-ribosylation factor 4	ARF4	0	0							Cluster of Isoform 3 of Treacle protein	TCOF1	946120	1073600			DYHC1_HUMAN Cytoplasmic dynein 1 heavy chain 1	DYNC1H1	0	5							IF4A1_HUMAN Eukaryotic initiation factor 4A-I	EIF4A1	8	10
	Isoform 5 of RNA-binding protein 14	RBM14	0	0							Isoform 2 of Serum albumin	ALB	210100	1097200			MCM6_HUMAN DNA replication licensing factor MCM6	MCM6	0	2							PHB2_HUMAN Prohibitin-2	PHB2 PE	9	10
	7-dehydrocholesterol reductase	DHCR7	0	-1							GTP-binding nuclear protein Ran	RAN	738000	1216500			TRIPC_HUMAN Isoform 2 of E3 ubiquitin-protein ligase TRIP12	TRIP12	0	2							RBM25_HUMAN RNA-binding protein 25	RBM25	10	10
	Isoform 2 of NSFL1 cofactor p47	NSFL1C	0	-1							60S ribosomal protein L13a	RPL13A	1517600	1224000			SMC1A_HUMAN Structural maintenance of chromosomes protein 1A	SMC1A	0	2							RS24_HUMAN Isoform 2 of 40S ribosomal protein S24	RPS24	12	10
	Isoform 2 of Nicalin	NCLN	0	-1							60S ribosomal protein L15	RPL15	1013700	1393800			GANAB_HUMAN Neutral alpha-glucosidase AB	GANAB	0	2							NP1L1_HUMAN Isoform 2 of Nucleosome assembly protein 1-like 1	NAP1L1	2	9
	Integrin-linked kinase-associated serine/threonine phosphatase 2C	ILKAP	0	-1							Cluster of Keratin, type II cytoskeletal 2 epidermal	KRT2	1172700	1449300			MARE2_HUMAN Isoform 3 of Microtubule-associated protein RP/EB family member 2	MAPRE2	0	2							BAZ1B_HUMAN Isoform 2 of Tyrosine-protein kinase BAZ1B	BAZ1B	3	9
	Very-long-chain 3-oxoacyl-CoA reductase	HSD17B12	0	-1							60S ribosomal protein L19	RPL19	13447000	1459200			AAAT_HUMAN Isoform 2 of Neutral amino acid transporter B(0)	SLC1A5	0	2							DNJB1_HUMAN DnaJ homolog subfamily B member 1	DNAJB1	4	9
	Isoform 2 of Transcriptional repressor p66-alpha	GATAD2A	0	-1							Cluster of Elongation factor 1-alpha 1	EEF1A1	838750	1501500			PSMF1_HUMAN Proteasome inhibitor PI31 subunit	PSMF1	0	2							DDX24_HUMAN ATP-dependent RNA helicase DDX24	DDX24	4	9
											Keratin, type I cytoskeletal 9	KRT9	526120	1573200			GCN1_HUMAN eIF-2-alpha kinase activator GCN1	GCN1	0	3							VIGLN_HUMAN Isoform 2 of Vigilin	HDLBP	5	9
											60S ribosomal protein L18a	RPL18A	10679000	1580500			NU205_HUMAN Nuclear pore complex protein Nup205	NUP205	0	2							FAS_HUMAN Fatty acid synthase	FASN PE	5	9
											60S ribosomal protein L3	RPL3	3870500	1618300			HDAC2_HUMAN Isoform 2 of Histone deacetylase 2	HDAC2	0	2							AP2M1_HUMAN Isoform 2 of AP-2 complex subunit mu	AP2M1	6	9
											60S ribosomal protein L24	RPL24	3998400	1694900			RENT1_HUMAN Isoform 2 of Regulator of nonsense transcripts 1	UPF1	0	3							RL27A_HUMAN 60S ribosomal protein L27a	RPL27A	7	9
											Cluster of Tubulin alpha-1B chain	TUBA1B	8447900	1787500			SMRD2_HUMAN Isoform 2 of SWI/SNF-related matrix-associated actin-dependent regulator of chromatin subfamily D member 2	SMARCD2	0	2							ENOA_HUMAN Alpha-enolase	ENO1 PE	9	9
											40S ribosomal protein S6	RPS6	1823900	2131900			DNJC7_HUMAN Isoform 2 of DnaJ homolog subfamily C member 7	DNAJC7	0	2							NPM_HUMAN Nucleophosmin	NPM1 PE	9	9
											DNA topoisomerase 1	TOP1	1664600	2181800			NP1L4_HUMAN Isoform 2 of Nucleosome assembly protein 1-like 4	NAP1L4	0	11							CSK21_HUMAN Casein kinase II subunit alpha	CSNK2A1	10	9
											Endoplasmic reticulum chaperone BiP	HSPA5	3487500	2659900													BIP_HUMAN Endoplasmic reticulum chaperone BiP	HSPA5 PE	11	9
											Cluster of Keratin, type I cytoskeletal 10	KRT10	2901600	2768200													SYRC_HUMAN Isoform Monomeric of Arginine--tRNA ligase, cytoplasmic	RARS	2	8
											60S ribosomal protein L23a	RPL23A	2992900	3110500													MYH10_HUMAN Isoform 2 of Myosin-10	MYH10	2	8
											40S ribosomal protein S3	RPS3	4084900	3196900													PDLI1_HUMAN PDZ and LIM domain protein 1	PDLIM1	6	8
											60S ribosomal protein L27a	RPL27A	10007000	3433600													RL7_HUMAN 60S ribosomal protein L7	RPL7 PE	6	8
											60S ribosomal protein L7	RPL7	13184000	3780800													RS3A_HUMAN 40S ribosomal protein S3a	RPS3A PE	6	8
											60S ribosomal protein L6	RPL6	7038500	3999700													PHF6_HUMAN PHD finger protein 6	PHF6 PE	6	8
											60S ribosomal protein L7a	RPL7A	10428000	4108900													CSDE1_HUMAN Isoform 2 of Cold shock domain-containing protein E1	CSDE1	6	8
											60S ribosomal protein L14	RPL14	14559000	4189600													DDX17_HUMAN Probable ATP-dependent RNA helicase DDX17	DDX17	7	8
											Cluster of Tubulin beta chain	TUBB	3105100	4356100													BRD7_HUMAN Isoform 2 of Bromodomain-containing protein 7	BRD7	7	8
											Cluster of Vimentin	VIM	9165100	5049200													CDK12_HUMAN Isoform 2 of Cyclin-dependent kinase 12	CDK12	7	8
											Ubiquitin-40S ribosomal protein S27a	RPS27A	3050300	6435400													H2A2C_HUMAN Histone H2A type 2-C	HIST2H2AC	8	8
											60S ribosomal protein L13	RPL13	16001000	6562300													MCM7_HUMAN DNA replication licensing factor MCM7	MCM7 PE	8	8
											40S ribosomal protein S14	RPS14	15848000	6681200													RS3_HUMAN 40S ribosomal protein S3	RPS3 PE	9	8
											Isoform 2 of 60S ribosomal protein L18	RPL18	25739000	7345000													TCPE_HUMAN T-complex protein 1 subunit epsilon	CCT5 PE	9	8
											60S ribosomal protein L8	RPL8	18063000	7545100													CDK1_HUMAN Cyclin-dependent kinase 1	CDK1 PE	9	8
											Keratin, type II cytoskeletal 1	KRT1	2452000	7714700													RRP1B_HUMAN Isoform 2 of Ribosomal RNA processing protein 1 homolog B	RRP1B	3	7
											Histone H4	HIST1H4A	102530000	9165400													DDX54_HUMAN Isoform 2 of ATP-dependent RNA helicase DDX54	DDX54	3	7
											40S ribosomal protein S8	RPS8	27971000	13397000													ABCF2_HUMAN Isoform 2 of ATP-binding cassette sub-family F member 2	ABCF2	4	7
											Cluster of Heat shock 70 kDa protein 1A	HSPA1A	18682000	15275000													G3P_HUMAN Glyceraldehyde-3-phosphate dehydrogenase	GAPDH PE	5	7
											Cluster of Histone H3.2	HIST2H3A	97545	25190000													ANM5_HUMAN Protein arginine N-methyltransferase 5	PRMT5 PE	5	7
											SINV-CapsidBiolD2		7716900	41409000													SYIC_HUMAN Isoleucine--tRNA ligase, cytoplasmic	IARS PE	5	7
											Cluster of Histone H1.1	HIST1H1A	571610000	781360000													RAN_HUMAN GTP-binding nuclear protein Ran	RAN PE	6	7
																											STRAP_HUMAN Isoform 2 of Serine-threonine kinase receptor-associated protein	STRAP	6	7
																											ARF3_HUMAN ADP-ribosylation factor 3	ARF3 PE	6	7
																											KI67_HUMAN Proliferation marker protein Ki-67	MKI67 PE	6	7
																											H2AW_HUMAN Core histone macro-H2A.2	H2AFY2 PE	6	7
																											EF1A1_HUMAN Elongation factor 1-alpha 1	EEF1A1	7	7
																											SMRC1_HUMAN SWI/SNF complex subunit SMARCC1	SMARCC1	7	7
																											P5CS_HUMAN Isoform Short of Delta-1-pyrroline-5-carboxylate synthase	ALDH18A1	7	7
																											H2AX_HUMAN Histone H2AX	H2AFX PE	7	7
																											KNOP1_HUMAN Lysine-rich nucleolar protein 1	KNOP1	8	7
																											BAZ2A_HUMAN Isoform 1 of Bromodomain adjacent to zinc finger domain protein 2A	BAZ2A	8	7
																											ANXA2_HUMAN Isoform 2 of Annexin A2	ANXA2	8	7
																											SRRM2_HUMAN Isoform 2 of Serine/arginine repetitive matrix protein 2	SRRM2	8	7
																											RL9_HUMAN 60S ribosomal protein L9	RPL9 PE	8	7
																											UBP2L_HUMAN Isoform 2 of Ubiquitin-associated protein 2-like	UBAP2L	9	7
																											DRG1_HUMAN Developmentally-regulated GTP-binding protein 1	DRG1 PE	2	6
																											CHD5_HUMAN Chromodomain-helicase-DNA-binding protein 5	CHD5 PE	2	6
																											CHD3_HUMAN Chromodomain-helicase-DNA-binding protein 3	CHD3 PE	2	6
																											GRP75_HUMAN Stress-70 protein, mitochondrial	HSPA9	3	6
																											NKAP_HUMAN NF-kappa-B-activating protein	NKAP PE	3	6
																											COPA_HUMAN Isoform 2 of Coatomer subunit alpha	COPA	3	6
																											IF4G1_HUMAN Isoform B of Eukaryotic translation initiation factor 4 gamma 1	EIF4G1	3	6
																											CPSF2_HUMAN Cleavage and polyadenylation specificity factor subunit 2	CPSF2	4	6
																											DDX27_HUMAN Probable ATP-dependent RNA helicase DDX27	DDX27	4	6
																											MOES_HUMAN Moesin	MSN PE	4	6
																											TRAP1_HUMAN Isoform 2 of Heat shock protein 75 kDa, mitochondrial	TRAP1	4	6
																											G3BP1_HUMAN Ras GTPase-activating protein-binding protein 1	G3BP1	5	6
																											RS4X_HUMAN 40S ribosomal protein S4, X isoform	RPS4X PE	5	6
																											S30BP_HUMAN Isoform 2 of SAP30-binding protein	SAP30BP	5	6
																											PCBP1_HUMAN Poly(rC)-binding protein 1	PCBP1	6	6
																											RRS1_HUMAN Ribosome biogenesis regulatory protein homolog	RRS1 PE	6	6
																											SRRM1_HUMAN Isoform 2 of Serine/arginine repetitive matrix protein 1	SRRM1	7	6
																											LC7L3_HUMAN Luc7-like protein 3	LUC7L3	8	6
																											SRC8_HUMAN Src substrate cortactin	CTTN PE	8	6
																											TAGL2_HUMAN Isoform 2 of Transgelin-2	TAGLN2	8	6
																											U520_HUMAN U5 small nuclear ribonucleoprotein 200 kDa helicase	SNRNP200 PE	9	6
																											SMHD1_HUMAN Structural maintenance of chromosomes flexible hinge domain-containing protein 1	SMCHD1 PE	16	6
																											WDR46_HUMAN WD repeat-containing protein 46	WDR46	2	5
																											COPG1_HUMAN Coatomer subunit gamma-1	COPG1	2	5
																											RL31_HUMAN 60S ribosomal protein L31	RPL31 PE	2	5
																											RS27_HUMAN 40S ribosomal protein S27	RPS27 PE	2	5
																											ZO1_HUMAN Tight junction protein ZO-1	TJP1 PE	2	5
																											IMA7_HUMAN Importin subunit alpha-7	KPNA6 PE	2	5
																											NACAM_HUMAN Nascent polypeptide-associated complex subunit alpha, muscle-specific form	NACA	3	5
																											ZCCHV_HUMAN Zinc finger CCCH-type antiviral protein 1	ZC3HAV1	3	5
																											RIOK1_HUMAN Serine/threonine-protein kinase RIO1	RIOK1	3	5
																											RRP44_HUMAN Exosome complex exonuclease RRP44	DIS3	3	5
																											NOG1_HUMAN Isoform 2 of Nucleolar GTP-binding protein 1	GTPBP4	3	5
																											TEX10_HUMAN Isoform 2 of Testis-expressed protein 10	TEX10	3	5
																											NU214_HUMAN Isoform 2 of Nuclear pore complex protein Nup214	NUP214	3	5
																											TMA16_HUMAN Translation machinery-associated protein 16	TMA16	4	5
																											RS9_HUMAN 40S ribosomal protein S9	RPS9 PE	4	5
																											RL15_HUMAN 60S ribosomal protein L15	RPL15 PE	4	5
																											NSA2_HUMAN Ribosome biogenesis protein NSA2 homolog	NSA2 PE	4	5
																											GPTC4_HUMAN Isoform 3 of G patch domain-containing protein 4	GPATCH4	4	5
																											HNRH1_HUMAN Heterogeneous nuclear ribonucleoprotein H	HNRNPH1	5	5
																											RS26_HUMAN 40S ribosomal protein S26	RPS26 PE	5	5
																											EFTU_HUMAN Elongation factor Tu, mitochondrial	TUFM PE	5	5
																											SMRC2_HUMAN Isoform 2 of SWI/SNF complex subunit SMARCC2	SMARCC2	5	5
																											FMC1_HUMAN Isoform 2 of Protein FMC1 homolog	FMC1	5	5
																											EBP2_HUMAN Probable rRNA-processing protein EBP2	EBNA1BP2 PE	5	5
																											RS2_HUMAN 40S ribosomal protein S2	RPS2 PE	5	5
																											SRSF1_HUMAN Isoform ASF-2 of Serine/arginine-rich splicing factor 1	SRSF1	5	5
																											FIP1_HUMAN Pre-mRNA 3'-end-processing factor FIP1	FIP1L1 PE	6	5
																											COF1_HUMAN Cofilin-1	CFL1 PE	6	5
																											ELYS_HUMAN Isoform 2 of Protein ELYS	AHCTF1	7	5
																											ACTG_HUMAN Actin, cytoplasmic 2	ACTG1 PE	8	5
																											PP1G_HUMAN Isoform 2 of Serine/threonine-protein phosphatase PP1-gamma catalytic subunit	PPP1CC	9	5
																											SF3B1_HUMAN Splicing factor 3B subunit 1	SF3B1	14	5
																											RL5_HUMAN 60S ribosomal protein L5	RPL5 PE	2	4
																											ABCD3_HUMAN Isoform 2 of ATP-binding cassette sub-family D member 3	ABCD3	2	4
																											BRD9_HUMAN Bromodomain-containing protein 9	BRD9 PE	2	4
																											AP3B1_HUMAN Isoform 2 of AP-3 complex subunit beta-1	AP3B1	2	4
																											RRP5_HUMAN Protein RRP5 homolog	PDCD11 PE	2	4
																											XRCC5_HUMAN X-ray repair cross-complementing protein 5	XRCC5	3	4
																											RL32_HUMAN 60S ribosomal protein L32	RPL32 PE	3	4
																											BTF3_HUMAN Isoform 2 of Transcription factor BTF3	BTF3	3	4
																											RL17_HUMAN Isoform 3 of 60S ribosomal protein L17	RPL17	3	4
																											BUB3_HUMAN Isoform 2 of Mitotic checkpoint protein BUB3	BUB3	3	4
																											TBG1_HUMAN Tubulin gamma-1 chain	TUBG1 PE	3	4
																											TCPG_HUMAN Isoform 2 of T-complex protein 1 subunit gamma	CCT3	3	4
																											CLH1_HUMAN Isoform 2 of Clathrin heavy chain 1	CLTC	3	4
																											RS15A_HUMAN 40S ribosomal protein S15a	RPS15A	4	4
																											CHERP_HUMAN Calcium homeostasis endoplasmic reticulum protein	CHERP	4	4
																											RL18A_HUMAN 60S ribosomal protein L18a	RPL18A	4	4
																											RL8_HUMAN 60S ribosomal protein L8	RPL8 PE	4	4
																											DDX5_HUMAN Isoform 2 of Probable ATP-dependent RNA helicase DDX5	DDX5	4	4
																											CENPV_HUMAN Isoform 3 of Centromere protein V	CENPV	4	4
																											P66B_HUMAN Transcriptional repressor p66-beta	GATAD2B PE	4	4
																											MCCA_HUMAN Methylcrotonoyl-CoA carboxylase subunit alpha, mitochondrial	MCCC1 PE	4	4
																											SRS11_HUMAN Isoform 2 of Serine/arginine-rich splicing factor 11	SRSF11	4	4
																											SYQ_HUMAN Glutamine--tRNA ligase	QARS PE	4	4
																											CBX3_HUMAN Chromobox protein homolog 3	CBX3 PE	6	4
																											H1X_HUMAN Histone H1x	H1FX PE	7	4
																											RL13A_HUMAN 60S ribosomal protein L13a	RPL13A	2	3
																											NUFP2_HUMAN Nuclear fragile X mental retardation-interacting protein 2	NUFIP2	2	3
																											REXO4_HUMAN RNA exonuclease 4	REXO4	2	3
																											ATPG_HUMAN ATP synthase subunit gamma, mitochondrial	ATP5F1C PE	2	3
																											IF2B_HUMAN Eukaryotic translation initiation factor 2 subunit 2	EIF2S2 PE	2	3
																											SNF5_HUMAN Isoform B of SWI/SNF-related matrix-associated actin-dependent regulator of chromatin subfamily B member 1	SMARCB1	2	3
																											TIM50_HUMAN Isoform 2 of Mitochondrial import inner membrane translocase subunit TIM50	TIMM50	2	3
																											IMA1_HUMAN Importin subunit alpha-1	KPNA2 PE	2	3
																											SYYC_HUMAN Tyrosine--tRNA ligase, cytoplasmic	YARS PE	2	3
																											MCM4_HUMAN DNA replication licensing factor MCM4	MCM4 PE	2	3
																											BMS1_HUMAN Ribosome biogenesis protein BMS1 homolog	BMS1 PE	2	3
																											RBBP6_HUMAN Isoform 2 of E3 ubiquitin-protein ligase RBBP6	RBBP6	2	3
																											PRDX6_HUMAN Peroxiredoxin-6	PRDX6	3	3
																											SURF4_HUMAN Isoform 2 of Surfeit locus protein 4	SURF4	3	3
																											SERA_HUMAN D-3-phosphoglycerate dehydrogenase	PHGDH PE	3	3
																											RL13_HUMAN 60S ribosomal protein L13	RPL13 PE	3	3
																											TCPD_HUMAN T-complex protein 1 subunit delta	CCT4 PE	3	3
																											AFAD_HUMAN Isoform 2 of Afadin	AFDN	3	3
																											RS14_HUMAN 40S ribosomal protein S14	RPS14 PE	3	3
																											RL11_HUMAN Isoform 2 of 60S ribosomal protein L11	RPL11	3	3
																											SREK1_HUMAN Isoform 2 of Splicing regulatory glutamine/lysine-rich protein 1	SREK1	3	3
																											E41L3_HUMAN Isoform 2 of Band 4.1-like protein 3	EPB41L3	3	3
																											CDK13_HUMAN Isoform 2 of Cyclin-dependent kinase 13	CDK13	3	3
																											COPD_HUMAN Coatomer subunit delta	ARCN1 PE	3	3
																											RL26_HUMAN 60S ribosomal protein L26	RPL26 PE	3	3
																											BUD13_HUMAN BUD13 homolog	BUD13 PE	3	3
																											SNIP1_HUMAN Smad nuclear-interacting protein 1	SNIP1	4	3
																											MEP50_HUMAN Methylosome protein 50	WDR77	4	3
																											SFXN1_HUMAN Sideroflexin-1	SFXN1	4	3
																											RS7_HUMAN 40S ribosomal protein S7	RPS7 PE	4	3
																											PDIA6_HUMAN Isoform 5 of Protein disulfide-isomerase A6	PDIA6	4	3
																											PCBP2_HUMAN Isoform 2 of Poly(rC)-binding protein 2	PCBP2	4	3
																											MMTA2_HUMAN Isoform 4 of Multiple myeloma tumor-associated protein 2	MMTAG2	4	3
																											RS11_HUMAN 40S ribosomal protein S11	RPS11 PE	4	3
																											RL23_HUMAN 60S ribosomal protein L23	RPL23 PE	4	3
																											SMD1_HUMAN Small nuclear ribonucleoprotein Sm D1	SNRPD1 PE	4	3
																											RBM34_HUMAN RNA-binding protein 34	RBM34	5	3
																											RL36A_HUMAN 60S ribosomal protein L36a	RPL36A	5	3
																											RL22_HUMAN 60S ribosomal protein L22	RPL22 PE	5	3
																											PRP4B_HUMAN Serine/threonine-protein kinase PRP4 homolog	PRPF4B	6	3
																											KAP2_HUMAN Isoform 2 of cAMP-dependent protein kinase type II-alpha regulatory subunit	PRKAR2A	7	3
																											SERPH_HUMAN Serpin H1	SERPINH1	2	2
																											CSK2B_HUMAN Casein kinase II subunit beta	CSNK2B	2	2
																											MEPCE_HUMAN 7SK snRNA methylphosphate capping enzyme	MEPCE	2	2
																											NOC3L_HUMAN Nucleolar complex protein 3 homolog	NOC3L	2	2
																											SPF45_HUMAN Splicing factor 45	RBM17	2	2
																											CPSF1_HUMAN Cleavage and polyadenylation specificity factor subunit 1	CPSF1	2	2
																											TAF4_HUMAN Transcription initiation factor TFIID subunit 4	TAF4 PE	2	2
																											XPC_HUMAN DNA repair protein complementing XP-C cells	XPC PE	2	2
																											MED19_HUMAN Isoform 2 of Mediator of RNA polymerase II transcription subunit 19	MED19	2	2
																											DNJA1_HUMAN Isoform 2 of DnaJ homolog subfamily A member 1	DNAJA1	2	2
																											RFC2_HUMAN Isoform 2 of Replication factor C subunit 2	RFC2	2	2
																											RS16_HUMAN 40S ribosomal protein S16	RPS16 PE	2	2
																											ATX2L_HUMAN Isoform 3 of Ataxin-2-like protein	ATXN2L	2	2
																											LLPH_HUMAN Protein LLP homolog	LLPH PE	2	2
																											JUPI1_HUMAN Isoform 2 of Jupiter microtubule associated homolog 1	JPT1	2	2
																											TLN1_HUMAN Talin-1	TLN1 PE	2	2
																											AR6P4_HUMAN Isoform 2 of ADP-ribosylation factor-like protein 6-interacting protein 4	ARL6IP4	2	2
																											SMCE1_HUMAN Isoform 3 of SWI/SNF-related matrix-associated actin-dependent regulator of chromatin subfamily E member 1	SMARCE1	2	2
																											IF4H_HUMAN Eukaryotic translation initiation factor 4H	EIF4H PE	2	2
																											ELAV1_HUMAN Isoform 2 of ELAV-like protein 1	ELAVL1	2	2
																											IF4B_HUMAN Isoform 2 of Eukaryotic translation initiation factor 4B	EIF4B	2	2
																											TAF6_HUMAN Isoform 3 of Transcription initiation factor TFIID subunit 6	TAF6	2	2
																											RS30_HUMAN 40S ribosomal protein S30	FAU PE	2	2
																											WAC2C_HUMAN Isoform 2 of WASH complex subunit 2C	WASHC2C	2	2
																											ARID2_HUMAN Isoform 2 of AT-rich interactive domain-containing protein 2	ARID2	2	2
																											RBM39_HUMAN Isoform 3 of RNA-binding protein 39	RBM39	2	2
																											PCH2_HUMAN Pachytene checkpoint protein 2 homolog	TRIP13 PE	2	2
																											AHSA1_HUMAN Isoform 2 of Activator of 90 kDa heat shock protein ATPase homolog 1	AHSA1	2	2
																											HNRPC_HUMAN Isoform C1 of Heterogeneous nuclear ribonucleoproteins C1/C2	HNRNPC	2	2
																											PYR1_HUMAN CAD protein	CAD PE	2	2
																											NAA40_HUMAN Isoform 2 of N-alpha-acetyltransferase 40	NAA40	2	2
																											FLNC_HUMAN Isoform 2 of Filamin-C	FLNC	2	2
																											PRDX2_HUMAN Peroxiredoxin-2	PRDX2	3	2
																											CEBPZ_HUMAN CCAAT/enhancer-binding protein zeta	CEBPZ	3	2
																											PRDX1_HUMAN Peroxiredoxin-1	PRDX1	3	2
																											PUR6_HUMAN Isoform 2 of Multifunctional protein ADE2	PAICS	3	2
																											AT2A2_HUMAN Isoform 2 of Sarcoplasmic/endoplasmic reticulum calcium ATPase 2	ATP2A2	3	2
																											P66A_HUMAN Isoform 2 of Transcriptional repressor p66-alpha	GATAD2A	3	2
																											RPA34_HUMAN Isoform 2 of DNA-directed RNA polymerase I subunit RPA34	CD3EAP	3	2
																											U2AF2_HUMAN Isoform 2 of Splicing factor U2AF 65 kDa subunit	U2AF2	3	2
																											BRX1_HUMAN Ribosome biogenesis protein BRX1 homolog	BRIX1 PE	3	2
																											SRSF7_HUMAN Isoform 2 of Serine/arginine-rich splicing factor 7	SRSF7	3	2
																											PRP19_HUMAN Pre-mRNA-processing factor 19	PRPF19	4	2
																											BPTF_HUMAN Isoform 4 of Nucleosome-remodeling factor subunit BPTF	BPTF	4	2
																											HNRPU_HUMAN Isoform 2 of Heterogeneous nuclear ribonucleoprotein U	HNRNPU	4	2
																											IF2G_HUMAN Eukaryotic translation initiation factor 2 subunit 3	EIF2S3 PE	4	2
																											ALBU_HUMAN Isoform 2 of Serum albumin	ALB	4	2
																											RSBNL_HUMAN Round spermatid basic protein 1-like protein	RSBN1L	5	2
																											SFPQ_HUMAN Splicing factor, proline- and glutamine-rich	SFPQ PE	5	2
																											HNRPK_HUMAN Isoform 2 of Heterogeneous nuclear ribonucleoprotein K	HNRNPK	5	2
																											RAGP1_HUMAN Ran GTPase-activating protein 1	RANGAP1	6	2
																											MAP4_HUMAN Isoform 6 of Microtubule-associated protein 4	MAP4	7	2
																											NUCL_HUMAN Nucleolin	NCL PE	7	2

## Sheet: Common Lists
	Capsid BioID2						BioID2					NonSpecific
	Common		1810 Run	1812 Run			Common		1810 Run	1812 Run		Common		1810 Run	1812 Run
	TARDBP		ZC3HAV1	MYO1C			GMPS		MON2	SART1		MYH10		GCN1	SINV-CapsidBioID2
	EEF1G		U2SURP	COPE			HNRNPM		JUP	NUDT21		CCT3		NUP205	EIF5B PE
	LTV1		MB21D2	IRS4			TRIM28		CTPS1	ABCE1		NUMA1		EIF3A	TUBB PE
	DHX30		SUGT1	PSMD3					SEC61A1	YWHAZ		XRCC5		RRS1	HSPA1A PE
	LARS		DKC1	XPOT					MTA2	UTP23		LDHA		FTSJ3	RPL4 PE
	EIF5A		PRKCA	DNAJA2					CSE1L	NOC4L		MYBBP1A		RRP12	TUBA1B PE
	GPATCH8		YBX1	PHF2					HUWE1	NIFK		SUPT16H		HNRNPF	HIST1H1A PE
	YTHDC2		TJP2	NDUFS7					SMC2	C1QBP		HNRNPH1		AHNAK	RPS23 PE
	SMC3		STRAP	PRKRA					NUP155	EIF3I		ALDH18A1		BMS1	KRT1 PE
	LARP1		DCTN1	SURF6					IQGAP1	APBB1		COPA		DYNC1H1	NAT10
	HSP90B1		TMEM41B	EIF3G					STOML2	U2SURP		HDLBP		IMMT	RPS8 PE
	AP2A1		MYH9	IPO7					XPO1	PRPF4		CHERP		SND1	RPL7A PE
	FBL		RPS3A	ACTL6A					GTF2I	XRCC6		CLTC		EEF2	KRT2 PE
	IRAK1		RANBP2	ASS1					BAZ1B	DSP PE		HNRNPK		TSR1	RPL6 PE
	IGF2BP3		AP3D1	ATP1A1					MCM7	STMN1		PCBP2		NOP2	AP3D1
	STAU1		EIF3D	PCCA					DHX29	UQCRC2 PE		PRKDC		IRS4	FTSJ3 PE
	MARS		CSNK2A1	ATP5F1B					FN1	PTBP1		EIF4A1		FASN	ABCF1
	YTHDF2		NUP214	SRPRA					TOP2B	STIP1		NOP56		ATAD3A	THOC2
	DARS		TLN1	EZR					PSMC4	FUS PE		UBAP2L		EPRS	DDX18
			MDN1	CTPS1					TUBGCP3	SARS PE		HNRNPC		SON	NOP2 PE
			SMARCA5	GART					SMCHD1	NUP153		PARP1		DRG1	GNL3
			RBM25	RPL10					GNL3	BLVRA PE		IGF2BP1		DHX9	KRT9 PE
			ABCF1	UQCRC1					CAND1	ACLY		DHX15		ATP5F1A	HSPA8
			RRBP1	RDX					PDCD6IP	VCP PE		RPS24		MCCC1	POP1 PE
			H2AFY	MSH2					PHB	EIF6 PE		MAP1B		SFPQ	SSRP1
			EIF4G1	PSMC4					PRPF6	HIST1H4A PE		RPS15A		CCT6A	GNL2 PE
			PRPF4B	MCM2					TUFM	TAF2 PE		RACK1		CDK1	TOP1 PE
			PRPF8	HNRNPF					POLRMT	SUGP2		PDLIM1		RPL5	HIST2H2BF
			RBBP6	MSH6					GTPBP4	JPT2		DDX3X		ENO1	KRT14 PE
			RUVBL2	SLC16A1					EIF3G	HACD3		RPL11		TUBG1	RABL6
			GNL2	NPEPPS					NCL	EPS15L1		DDX5		CCT5	LYAR PE
			PDCD11	GEMIN4					RBM14	EIF2B4		RSL1D1		PCCB	HP1BP3
			DNAJC9	UBE2M					NAT10	USP39		DDX21		CCT8	PUF60
			PUF60	ETF1					MAP4	PGAM5		HNRNPU		RPS2	MTDH
			ANXA2	RRP12					ABCD3	ERBIN		NOP58		SLC25A5	EPRS PE
			RBM34	NT5DC1					ARF3	RBM15		FLNA		NONO	TOP2A
			RPS7	HIST2H2BC					SFXN1	DSG1 PE		TCOF1		TCP1	CCT8 PE
			G3BP1	DHX57					DDX54	EXOSC9		ALB		CCT7	SMARCA4
			RIF1	ANKRD11					SF3B1	AHNAK PE		RPL13A		RPL9	TCP1 PE
			RBM17	SND1					CTTN	HNRNPA0 PE		EEF1A1		HSP90AB1	CDK11B
			CSDE1	EFL1					RPS13	SPTAN1		RPL18A		PCCA	LDHB PE
			VDAC2	DHX37					SURF4	2018-09-02		KRT10		RPL22	DHX9 PE
			H1FX	CHD6					CCT4	TAF5		RPL23A		RPL10	DDX50
			NT5DC2	PDCD6IP					GAPDH	SMN1 PE		RPL27A		PC	PKM PE
			HNRNPAB	BBX					PSMD3	PHF3		RPS27A		RPL23	HSP90AB1 PE
			PFKL	GRWD1					DDX50	AKAP1		RPL18		PHB2	PC PE
			HSPA9	DDX23					CBX3	TWISTNB				RPL31	RUVBL2
			NAP1L1	USP42					RPS23	ZNF280C				RPS16	RUVBL1
			RPS18	RPF1					RPL21	LIMD1				CFL1	SLIT2
			GPATCH4	HEATR1					RPL30	SF3B6				RPL26	RFC1 PE
			STAU2	ARMT1					SLC25A3	SF3B4				RPS9	DHX29
			HACD3	PPAN					HIST1H2BN	HNRNPA1				RPS4X	RPS6 PE
			MRPL23	PDLIM7					RPL36	CKB PE				HIST1H2AB	RPL14 PE
			NUP188	PAK1IP1					RPL17	HNRNPL				PKM	RPL3 PE
			SRRM1	COPG2					RPL27	YWHAE				RPS11	VIM PE
			COPB2	USP16					RPL32	NSUN2				RPL4	CHD4 PE
			ACSL3	IGF2BP2					RPL28	NOL6 PE				NPM1	RPL24 PE
			PES1	PDLIM3						NUP50				RPS27	SRP72
			EIF2S3	PEG10						NUDC PE				RAN	PRPF40A PE
			MMTAG2	KTN1						DDX42				RPL15	SLC25A5 PE
			UBA1	CAND1						SET PE				KRT2	ATP5F1A PE
			ATP5F1C	PYCR2						MDC1				RPL19	PABPC1
			HNRNPA0	CCDC124						NOLC1				KRT9	SMARCA5
			NOC3L	KIF1BP						CPSF6				RPL3	TOP2B
			OLA1	EDC3						MATR3				RPL24	H2AFY
			SF3B3	PDLIM5						SCAF1				TUBA1B	EEF2 PE
			URB1	LCOR						TPD52L2				RPS6	SON PE
			TRAP1	BTF3L4						RANBP2 PE				TOP1	MYH9 PE
			NACA	ZNF512						HCFC1				HSPA5	TSR1 PE
			EIF4B	SLC25A3						PSPC1				RPS3	PBRM1 PE
			ATP5MF	TBL3						ESYT1				RPL7	SRPK1
			RPS26	AIMP1						NSFL1C				RPL6	PHB PE
			EIF5B	AIMP2						SAFB				RPL7A	CCT6A PE
			RBBP7	DDX10						EPB41L2				RPL14	PHB2 PE
			HNRNPA1	NAE1						TP53 PE				TUBB	RBM25
			ARF4	DYNC1H1						CD2BP2				VIM	NAP1L1
			RBM14	MCM6						MRE11				RPL13	BAZ1B
			DHCR7	TRIP12						TMPO				RPS14	DNAJB1
			NSFL1C	SMC1A						NONO PE				RPL8	DDX24
			NCLN	GANAB										KRT1	FASN PE
			ILKAP	MAPRE2										HIST1H4A	AP2M1
			HSD17B12	SLC1A5										RPS8	ENO1 PE
			GATAD2A	PSMF1										HSPA1A	NPM1 PE
				GCN1										HIST2H3A	CSNK2A1
				NUP205										HIST1H1A	HSPA5 PE
				HDAC2											RARS
				UPF1											RPL7 PE
				SMARCD2											RPS3A PE
				DNAJC7											PHF6 PE
				NAP1L4											CSDE1
															DDX17
															BRD7
															CDK12
															HIST2H2AC
															MCM7 PE
															RPS3 PE
															CCT5 PE
															CDK1 PE
															RRP1B
															DDX54
															ABCF2
															GAPDH PE
															PRMT5 PE
															IARS PE
															RAN PE
															STRAP
															ARF3 PE
															MKI67 PE
															H2AFY2 PE
															SMARCC1
															H2AFX PE
															KNOP1
															BAZ2A
															ANXA2
															SRRM2
															RPL9 PE
															DRG1 PE
															CHD5 PE
															CHD3 PE
															HSPA9
															NKAP PE
															EIF4G1
															CPSF2
															DDX27
															MSN PE
															TRAP1
															G3BP1
															RPS4X PE
															SAP30BP
															PCBP1
															RRS1 PE
															SRRM1
															LUC7L3
															CTTN PE
															TAGLN2
															SNRNP200 PE
															SMCHD1 PE
															WDR46
															COPG1
															RPL31 PE
															RPS27 PE
															TJP1 PE
															KPNA6 PE
															NACA
															ZC3HAV1
															RIOK1
															DIS3
															GTPBP4
															TEX10
															NUP214
															TMA16
															RPS9 PE
															RPL15 PE
															NSA2 PE
															GPATCH4
															RPS26 PE
															TUFM PE
															SMARCC2
															FMC1
															EBNA1BP2 PE
															RPS2 PE
															SRSF1
															FIP1L1 PE
															CFL1 PE
															AHCTF1
															ACTG1 PE
															PPP1CC
															SF3B1
															RPL5 PE
															ABCD3
															BRD9 PE
															AP3B1
															PDCD11 PE
															RPL32 PE
															BTF3
															RPL17
															BUB3
															TUBG1 PE
															RPL8 PE
															CENPV
															GATAD2B PE
															MCCC1 PE
															SRSF11
															QARS PE
															CBX3 PE
															H1FX PE
															NUFIP2
															REXO4
															ATP5F1C PE
															EIF2S2 PE
															SMARCB1
															TIMM50
															KPNA2 PE
															YARS PE
															MCM4 PE
															BMS1 PE
															RBBP6
															PRDX6
															SURF4
															PHGDH PE
															RPL13 PE
															CCT4 PE
															AFDN
															RPS14 PE
															SREK1
															EPB41L3
															CDK13
															ARCN1 PE
															RPL26 PE
															BUD13 PE
															SNIP1
															WDR77
															SFXN1
															RPS7 PE
															PDIA6
															MMTAG2
															RPS11 PE
															RPL23 PE
															SNRPD1 PE
															RBM34
															RPL36A
															RPL22 PE
															PRPF4B
															PRKAR2A
															SERPINH1
															CSNK2B
															MEPCE
															NOC3L
															RBM17
															CPSF1
															TAF4 PE
															XPC PE
															MED19
															DNAJA1
															RFC2
															RPS16 PE
															ATXN2L
															LLPH PE
															JPT1
															TLN1 PE
															ARL6IP4
															SMARCE1
															EIF4H PE
															ELAVL1
															EIF4B
															TAF6
															FAU PE
															WASHC2C
															ARID2
															RBM39
															TRIP13 PE
															AHSA1
															CAD PE
															NAA40
															FLNC
															PRDX2
															CEBPZ
															PRDX1
															PAICS
															ATP2A2
															GATAD2A
															CD3EAP
															U2AF2
															BRIX1 PE
															SRSF7
															PRPF19
															BPTF
															EIF2S3 PE
															RSBN1L
															SFPQ PE
															RANGAP1
															MAP4
															NCL PE

## Sheet: Uniprot Accession Conversion
From	To	Species	Gene Name
IRAK1	H7C3C1	Homo sapiens	interleukin 1 receptor associated kinase 1(IRAK1)
IRAK1	L8E7M9	Homo sapiens	interleukin 1 receptor associated kinase 1(IRAK1)
IRAK1	H7C1F0	Homo sapiens	interleukin 1 receptor associated kinase 1(IRAK1)
IRAK1	H7C3G8	Homo sapiens	interleukin 1 receptor associated kinase 1(IRAK1)
IRAK1	H7C224	Homo sapiens	interleukin 1 receptor associated kinase 1(IRAK1)
IRAK1	F8WAB6	Homo sapiens	interleukin 1 receptor associated kinase 1(IRAK1)
IRAK1	P51617	Homo sapiens	interleukin 1 receptor associated kinase 1(IRAK1)
IRAK1	H7C2I6	Homo sapiens	interleukin 1 receptor associated kinase 1(IRAK1)
IRAK1	D3YTB5	Homo sapiens	interleukin 1 receptor associated kinase 1(IRAK1)
DARS	Q53R85	Homo sapiens	aspartyl-tRNA synthetase(DARS)
DARS	H7C278	Homo sapiens	aspartyl-tRNA synthetase(DARS)
DARS	P14868	Homo sapiens	aspartyl-tRNA synthetase(DARS)
DARS	C9J7S3	Homo sapiens	aspartyl-tRNA synthetase(DARS)
DARS	D3DP78	Homo sapiens	aspartyl-tRNA synthetase(DARS)
DARS	H7BZ35	Homo sapiens	aspartyl-tRNA synthetase(DARS)
DARS	A0A140VJW5	Homo sapiens	aspartyl-tRNA synthetase(DARS)
DARS	C9JQM9	Homo sapiens	aspartyl-tRNA synthetase(DARS)
DARS	C9JLC1	Homo sapiens	aspartyl-tRNA synthetase(DARS)
DARS	Q53T60	Homo sapiens	aspartyl-tRNA synthetase(DARS)
EIF5A	I3L504	Homo sapiens	eukaryotic translation initiation factor 5A(EIF5A)
EIF5A	I3L397	Homo sapiens	eukaryotic translation initiation factor 5A(EIF5A)
EIF5A	P63241	Homo sapiens	eukaryotic translation initiation factor 5A(EIF5A)
YTHDF2	S4R3V3	Homo sapiens	YTH N6-methyladenosine RNA binding protein 2(YTHDF2)
YTHDF2	S4R3J8	Homo sapiens	YTH N6-methyladenosine RNA binding protein 2(YTHDF2)
YTHDF2	Q9Y5A9	Homo sapiens	YTH N6-methyladenosine RNA binding protein 2(YTHDF2)
YTHDF2	B5BU99	Homo sapiens	YTH N6-methyladenosine RNA binding protein 2(YTHDF2)
YTHDF2	A0A087WXZ3	Homo sapiens	YTH N6-methyladenosine RNA binding protein 2(YTHDF2)
YTHDC2	D6RF50	Homo sapiens	YTH domain containing 2(YTHDC2)
YTHDC2	D6RA70	Homo sapiens	YTH domain containing 2(YTHDC2)
YTHDC2	D6R9T8	Homo sapiens	YTH domain containing 2(YTHDC2)
YTHDC2	Q9H6S0	Homo sapiens	YTH domain containing 2(YTHDC2)
IGF2BP3	F8WD15	Homo sapiens	insulin like growth factor 2 mRNA binding protein 3(IGF2BP3)
IGF2BP3	O00425	Homo sapiens	insulin like growth factor 2 mRNA binding protein 3(IGF2BP3)
FBL	M0QXL5	Homo sapiens	fibrillarin(FBL)
FBL	M0QXC9	Homo sapiens	fibrillarin(FBL)
FBL	M0R299	Homo sapiens	fibrillarin(FBL)
FBL	M0R2U2	Homo sapiens	fibrillarin(FBL)
FBL	M0R0P1	Homo sapiens	fibrillarin(FBL)
FBL	M0R2B0	Homo sapiens	fibrillarin(FBL)
FBL	M0R1H0	Homo sapiens	fibrillarin(FBL)
FBL	Q96BS4	Homo sapiens	fibrillarin(FBL)
FBL	M0R2Q4	Homo sapiens	fibrillarin(FBL)
FBL	A0A0D9SFM2	Homo sapiens	fibrillarin(FBL)
FBL	P22087	Homo sapiens	fibrillarin(FBL)
SMC3	Q9UQE7	Homo sapiens	structural maintenance of chromosomes 3(SMC3)
SMC3	Q86VX4	Homo sapiens	structural maintenance of chromosomes 3(SMC3)
LARP1	H0YC33	Homo sapiens	La ribonucleoprotein domain family member 1(LARP1)
LARP1	Q6PKG0	Homo sapiens	La ribonucleoprotein domain family member 1(LARP1)
LARP1	H0YBM7	Homo sapiens	La ribonucleoprotein domain family member 1(LARP1)
LARP1	H0YBR8	Homo sapiens	La ribonucleoprotein domain family member 1(LARP1)
LARP1	H0YAX9	Homo sapiens	La ribonucleoprotein domain family member 1(LARP1)
LARP1	A0A0B4J210	Homo sapiens	La ribonucleoprotein domain family member 1(LARP1)
LARP1	H0YC73	Homo sapiens	La ribonucleoprotein domain family member 1(LARP1)
LARP1	H0YAN4	Homo sapiens	La ribonucleoprotein domain family member 1(LARP1)
LARP1	E5RH50	Homo sapiens	La ribonucleoprotein domain family member 1(LARP1)
LARP1	H0YBW1	Homo sapiens	La ribonucleoprotein domain family member 1(LARP1)
LARP1	E5RHK4	Homo sapiens	La ribonucleoprotein domain family member 1(LARP1)
LARP1	H0YBJ5	Homo sapiens	La ribonucleoprotein domain family member 1(LARP1)
STAU1	B3KRE0	Homo sapiens	staufen double-stranded RNA binding protein 1(STAU1)
STAU1	Q5JW28	Homo sapiens	staufen double-stranded RNA binding protein 1(STAU1)
STAU1	O95793	Homo sapiens	staufen double-stranded RNA binding protein 1(STAU1)
STAU1	Q6PJX3	Homo sapiens	staufen double-stranded RNA binding protein 1(STAU1)
STAU1	A0A087X1A5	Homo sapiens	staufen double-stranded RNA binding protein 1(STAU1)
STAU1	F6UDC6	Homo sapiens	staufen double-stranded RNA binding protein 1(STAU1)
STAU1	Q5JW30	Homo sapiens	staufen double-stranded RNA binding protein 1(STAU1)
STAU1	Q59F99	Homo sapiens	staufen double-stranded RNA binding protein 1(STAU1)
HSP90B1	P14625	Homo sapiens	heat shock protein 90 beta family member 1(HSP90B1)
HSP90B1	F8W026	Homo sapiens	heat shock protein 90 beta family member 1(HSP90B1)
HSP90B1	V9HWP2	Homo sapiens	heat shock protein 90 beta family member 1(HSP90B1)
HSP90B1	Q96GW1	Homo sapiens	heat shock protein 90 beta family member 1(HSP90B1)
HSP90B1	F8VPC7	Homo sapiens	heat shock protein 90 beta family member 1(HSP90B1)
HSP90B1	H0YIV0	Homo sapiens	heat shock protein 90 beta family member 1(HSP90B1)
AP2A1	M0R2D9	Homo sapiens	adaptor related protein complex 2 alpha 1 subunit(AP2A1)
AP2A1	O95782	Homo sapiens	adaptor related protein complex 2 alpha 1 subunit(AP2A1)
TARDBP	G3V162	Homo sapiens	TAR DNA binding protein(TARDBP)
TARDBP	A0A024R4E2	Homo sapiens	TAR DNA binding protein(TARDBP)
TARDBP	A0A087WX67	Homo sapiens	TAR DNA binding protein(TARDBP)
TARDBP	A0A087WXQ5	Homo sapiens	TAR DNA binding protein(TARDBP)
TARDBP	Q9H256	Homo sapiens	TAR DNA binding protein(TARDBP)
TARDBP	A0A0A0MSV7	Homo sapiens	TAR DNA binding protein(TARDBP)
TARDBP	A0A087WZC9	Homo sapiens	TAR DNA binding protein(TARDBP)
TARDBP	A0A087WZM1	Homo sapiens	TAR DNA binding protein(TARDBP)
TARDBP	K7EJM5	Homo sapiens	TAR DNA binding protein(TARDBP)
TARDBP	A0A087WV68	Homo sapiens	TAR DNA binding protein(TARDBP)
TARDBP	A0A087WW61	Homo sapiens	TAR DNA binding protein(TARDBP)
TARDBP	K7EL26	Homo sapiens	TAR DNA binding protein(TARDBP)
TARDBP	B1AKP7	Homo sapiens	TAR DNA binding protein(TARDBP)
TARDBP	K7EN94	Homo sapiens	TAR DNA binding protein(TARDBP)
TARDBP	A0A087WX29	Homo sapiens	TAR DNA binding protein(TARDBP)
TARDBP	A0A087X260	Homo sapiens	TAR DNA binding protein(TARDBP)
TARDBP	A0A087WTG4	Homo sapiens	TAR DNA binding protein(TARDBP)
TARDBP	A0A087WVX6	Homo sapiens	TAR DNA binding protein(TARDBP)
TARDBP	A0A087WXV3	Homo sapiens	TAR DNA binding protein(TARDBP)
TARDBP	Q13148	Homo sapiens	TAR DNA binding protein(TARDBP)
TARDBP	K7ENM9	Homo sapiens	TAR DNA binding protein(TARDBP)
TARDBP	A0A087WYY0	Homo sapiens	TAR DNA binding protein(TARDBP)
TARDBP	K7EJ99	Homo sapiens	TAR DNA binding protein(TARDBP)
LARS	B4E266	Homo sapiens	leucyl-tRNA synthetase(LARS)
LARS	B4DER1	Homo sapiens	leucyl-tRNA synthetase(LARS)
LARS	A0A087WXY1	Homo sapiens	leucyl-tRNA synthetase(LARS)
LARS	Q9P2J5	Homo sapiens	leucyl-tRNA synthetase(LARS)
LARS	Q0VGM8	Homo sapiens	leucyl-tRNA synthetase(LARS)
LARS	Q6NVI4	Homo sapiens	leucyl-tRNA synthetase(LARS)
EEF1G	P26641	Homo sapiens	eukaryotic translation elongation factor 1 gamma(EEF1G)
EEF1G	Q53YD7	Homo sapiens	eukaryotic translation elongation factor 1 gamma(EEF1G)
DHX30	H7BXY3	Homo sapiens	DExH-box helicase 30(DHX30)
DHX30	A0A024R2T6	Homo sapiens	DExH-box helicase 30(DHX30)
DHX30	Q7L2E3	Homo sapiens	DExH-box helicase 30(DHX30)
DHX30	F6R0H4	Homo sapiens	DExH-box helicase 30(DHX30)
LTV1	Q96GA3	Homo sapiens	LTV1 ribosome biogenesis factor(LTV1)
GPATCH8	K7EQK8	Homo sapiens	G-patch domain containing 8(GPATCH8)
GPATCH8	Q9UKJ3	Homo sapiens	G-patch domain containing 8(GPATCH8)
GPATCH8	K7EKU0	Homo sapiens	G-patch domain containing 8(GPATCH8)
MARS	F8VZZ9	Homo sapiens	methionyl-tRNA synthetase(MARS)
MARS	H0YHL6	Homo sapiens	methionyl-tRNA synthetase(MARS)
MARS	P56192	Homo sapiens	methionyl-tRNA synthetase(MARS)
MARS	A0A024RBA2	Homo sapiens	methionyl-tRNA synthetase(MARS)
MARS	H0YI27	Homo sapiens	methionyl-tRNA synthetase(MARS)
MARS	H0YHV5	Homo sapiens	methionyl-tRNA synthetase(MARS)
MARS	F8VPL7	Homo sapiens	methionyl-tRNA synthetase(MARS)
MARS	F8W0S4	Homo sapiens	methionyl-tRNA synthetase(MARS)
MARS	F8W0M7	Homo sapiens	methionyl-tRNA synthetase(MARS)
MARS	H0YIC2	Homo sapiens	methionyl-tRNA synthetase(MARS)
MARS	F5H2V6	Homo sapiens	methionyl-tRNA synthetase(MARS)
MARS	H0YIP0	Homo sapiens	methionyl-tRNA synthetase(MARS)
MARS	F8VS26	Homo sapiens	methionyl-tRNA synthetase(MARS)
MARS	H0YI94	Homo sapiens	methionyl-tRNA synthetase(MARS)

## Sheet: Molecular Function Ontology
Category	Term	Count	%	PValue	Genes	List Total	Pop Hits	Pop Total	Fold Enrichment	Bonferroni	Benjamini	FDR
GOTERM_MF_DIRECT	GO:0044822~poly(A) RNA binding	11	57.8947	4.59326e-08	M0QXL5, M0QXC9, G3V162, K7EQK8, M0R299, A0A024R4E2, M0R0P1, H0YBM7, Q9Y5A9, H0YC73, E5RHK4, Q9H6S0, B1AKP7, Q53R85, S4R3J8, D3DP78, D6RF50, Q5JW30, F8WD15, Q5JW28, Q6PJX3, A0A0B4J210, M0R2B0, A0A087WXQ5, A0A087WZC9, F6R0H4, A0A0D9SFM2, H0YBW1, P22087, Q53T60, A0A087WX29, H7BXY3, M0R2U2, Q96BS4, A0A087WXV3, I3L504, M0R2Q4, Q13148, E5RH50, P63241, K7EJ99, P14868, A0A087WX67, H7BZ35, A0A140VJW5, A0A…	19	1129	16881	8.65652	2.93968e-06	2.93968e-06	4.66631e-05
GOTERM_MF_DIRECT	GO:0005515~protein binding	18	94.7368	0.000136953	M0QXC9, M0QXL5, G3V162, K7EQK8, M0R299, M0R0P1, H0YBM7, H0YC73, Q6NVI4, Q9H6S0, Q53R85, D3DP78, Q0VGM8, Q9UQE7, Q53YD7, A0A0B4J210, Q6PJX3, M0R2B0, A0A087WXQ5, F6R0H4, Q86VX4, H0YBW1, Q96GW1, A0A0D9SFM2, H0YIV0, L8E7M9, H7C1F0, H7BXY3, Q96BS4, O95782, Q13148, M0R2Q4, H7C2I6, P63241, K7EJ99, H7C224, A0A087WX67, A0A140VJW5, A0A0A0MSV7, A0A087WW61, B5BU99, S4R3V3, B3KRE0, Q6PKG0, P14625, F8WAB6, D6R…	19	8785	16881	1.82044	0.00872726	0.00437319	0.139043
GOTERM_MF_DIRECT	GO:0003723~RNA binding	6	31.5789	0.00021167	M0QXL5, M0QXC9, G3V162, M0R299, A0A024R4E2, M0R0P1, A0A087WX67, Q9Y5A9, A0A0A0MSV7, V9HWP2, A0A087WW61, B5BU99, S4R3V3, B1AKP7, K7EN94, P14625, S4R3J8, O00425, A0A087WYY0, F8WD15, M0R2B0, A0A087WXQ5, Q9H256, I3L397, A0A087WZC9, A0A087WZM1, K7EJM5, A0A087WV68, A0A0D9SFM2, F8VPC7, Q96GW1, K7EL26, P22087, H0YIV0, A0A087WX29, M0R2U2, A0A087X260, M0R1H0, F8W026, A0A087WTG4, A0A087WVX6, Q96BS4, I3L504,…	19	547	16881	9.7456	0.0134569	0.00450591	0.214827
GOTERM_MF_DIRECT	GO:0005524~ATP binding	8	42.1053	0.000558393	B4DER1, Q6NVI4, Q9H6S0, Q53R85, D3DP78, D6RF50, Q0VGM8, Q9UQE7, H0YHV5, F8W0S4, Q86VX4, Q96GW1, F6R0H4, H0YIV0, Q53T60, L8E7M9, H7BXY3, H7C1F0, F5H2V6, Q9P2J5, H7C2I6, F8VZZ9, P56192, H0YI27, A0A024RBA2, P14868, H7C224, H7BZ35, A0A140VJW5, V9HWP2, C9JLC1, F8W0M7, H0YIC2, A0A087WXY1, H7C278, B4E266, P14625, F8WAB6, P51617, H0YIP0, D6R9T8, H7C3C1, H0YHL6, C9J7S3, Q7L2E3, F8VPL7, F8VPC7, A0A024R2T6,…	19	1495	16881	4.75437	0.0351158	0.00889698	0.565825
GOTERM_MF_DIRECT	GO:0003730~mRNA 3'-UTR binding	3	15.7895	0.00122593	G3V162, A0A024R4E2, H0YBM7, A0A087WX67, H0YC73, A0A0A0MSV7, A0A087WW61, E5RHK4, B1AKP7, K7EN94, Q6PKG0, H0YAX9, O00425, A0A087WYY0, F8WD15, H0YC33, H0YBR8, A0A0B4J210, A0A087WXQ5, Q9H256, A0A087WZC9, A0A087WZM1, A0A087WV68, K7EJM5, H0YBW1, K7EL26, A0A087WX29, A0A087X260, A0A087WVX6, A0A087WTG4, A0A087WXV3, Q13148, H0YAN4, E5RH50, K7ENM9, K7EJ99, H0YBJ5	19	49	16881	54.3963	0.0755049	0.0155789	1.23846
GOTERM_MF_DIRECT	GO:0003676~nucleic acid binding	6	31.5789	0.00302954	G3V162, K7EQK8, A0A024R4E2, P14868, A0A087WX67, H7BZ35, A0A140VJW5, A0A0A0MSV7, C9JLC1, A0A087WW61, Q9H6S0, Q53R85, B1AKP7, H7C278, K7EN94, Q9UKJ3, D3DP78, D6RF50, O00425, A0A087WYY0, D6R9T8, F8WD15, C9J7S3, A0A087WXQ5, Q7L2E3, Q9H256, A0A087WZC9, A0A087WZM1, A0A087WV68, K7EJM5, F6R0H4, K7EL26, Q53T60, A0A087WX29, H7BXY3, A0A024R2T6, A0A087X260, A0A087WTG4, A0A087WVX6, A0A087WXV3, D6RA70, Q13148,…	19	985	16881	5.41202	0.176494	0.0318461	3.03537
GOTERM_MF_DIRECT	GO:1990247~N6-methyladenosine-containing RNA binding	2	10.5263	0.0074415	S4R3V3, S4R3J8, Q9Y5A9, D6RF50, D6RA70, B5BU99, D6R9T8, Q9H6S0	19	7	16881	253.85	0.380001	0.0660113	7.30736
GOTERM_MF_DIRECT	GO:0048027~mRNA 5'-UTR binding	2	10.5263	0.00955801	F8WD15, H0YC33, H0YBM7, A0A0B4J210, H0YBR8, H0YC73, H0YBW1, E5RHK4, Q6PKG0, H0YAX9, H0YAN4, O00425, E5RH50, H0YBJ5	19	9	16881	197.439	0.459173	0.0739545	9.29586
GOTERM_MF_DIRECT	GO:0004812~aminoacyl-tRNA ligase activity	2	10.5263	0.0179815	F8VZZ9, H0YHL6, B4DER1, P56192, H0YI27, A0A024RBA2, H0YHV5, F8VPL7, F8W0S4, Q6NVI4, F8W0M7, H0YIC2, A0A087WXY1, B4E266, F5H2V6, H0YIP0, Q9P2J5, Q0VGM8, H0YI94, F8VS26	19	17	16881	104.526	0.686918	0.121054	16.8345
GOTERM_MF_DIRECT	GO:0003746~translation elongation factor activity	2	10.5263	0.0356574	P26641, I3L504, I3L397, Q53YD7, P63241	19	34	16881	52.2632	0.902095	0.207351	30.8478
GOTERM_MF_DIRECT	GO:0003725~double-stranded RNA binding	2	10.5263	0.0631145	B3KRE0, Q5JW28, O95793, H7BXY3, A0A024R2T6, Q6PJX3, A0A087X1A5, F6UDC6, Q7L2E3, Q5JW30, Q59F99, F6R0H4	19	61	16881	29.1303	0.984585	0.315668	48.4341
GOTERM_MF_DIRECT	GO:0004004~ATP-dependent RNA helicase activity	2	10.5263	0.0671189	H7BXY3, A0A024R2T6, D6RF50, Q7L2E3, D6RA70, F6R0H4, D6R9T8, Q9H6S0	19	65	16881	27.3377	0.988281	0.309643	50.6299
#term ID	term description	observed gene count	background gene count	false discovery rate	matching proteins in your network (IDs)	matching proteins in your network (labels)
GO:0003723	RNA binding	11	850	8.95e-09	ENSP00000161863,ENSP00000240185,ENSP00000258729,ENSP00000262027,ENSP00000299767,ENSP00000331901,ENSP00000336702,ENSP00000336721,ENSP00000360922,ENSP00000362918,ENSP00000405620	DHX30,EEF1G,EIF5A,HSP90B1,IGF2BP3,LARP1,MARS,STAU1,TARDBP,YTHDC2,YTHDF2
GO:0140098	catalytic activity, acting on RNA	6	345	5.2e-05	ENSP00000161863,ENSP00000221801,ENSP00000262027,ENSP00000264161,ENSP00000377954,ENSP00000405620	DARS,DHX30,FBL,LARS,MARS,YTHDC2
GO:0045182	translation regulator activity	4	124	0.00019	ENSP00000258729,ENSP00000331901,ENSP00000336702,ENSP00000336721	EEF1G,EIF5A,IGF2BP3,LARP1
GO:0097159	organic cyclic compound binding	15	5382	0.00019	ENSP00000161863,ENSP00000240185,ENSP00000258729,ENSP00000262027,ENSP00000264161,ENSP00000299767,ENSP00000331901,ENSP00000336702,ENSP00000336721,ENSP00000354720,ENSP00000358997,ENSP00000360922,ENSP00000362918,ENSP00000377954,ENSP00000405620	DARS,DHX30,EEF1G,EIF5A,HSP90B1,IGF2BP3,IRAK1,LARP1,LARS,MARS,SMC3,STAU1,TARDBP,YTHDC2,YTHDF2
GO:1901363	heterocyclic compound binding	15	5305	0.00019	ENSP00000161863,ENSP00000240185,ENSP00000258729,ENSP00000262027,ENSP00000264161,ENSP00000299767,ENSP00000331901,ENSP00000336702,ENSP00000336721,ENSP00000354720,ENSP00000358997,ENSP00000360922,ENSP00000362918,ENSP00000377954,ENSP00000405620	DARS,DHX30,EEF1G,EIF5A,HSP90B1,IGF2BP3,IRAK1,LARP1,LARS,MARS,SMC3,STAU1,TARDBP,YTHDC2,YTHDF2
GO:0004812	aminoacyl-tRNA ligase activity	3	43	0.00028	ENSP00000262027,ENSP00000264161,ENSP00000377954	DARS,LARS,MARS
GO:0003730	mRNA 3'-UTR binding	3	63	0.00059	ENSP00000240185,ENSP00000258729,ENSP00000336721	IGF2BP3,LARP1,TARDBP
GO:0005524	ATP binding	8	1462	0.00059	ENSP00000161863,ENSP00000262027,ENSP00000264161,ENSP00000299767,ENSP00000354720,ENSP00000358997,ENSP00000377954,ENSP00000405620	DARS,DHX30,HSP90B1,IRAK1,LARS,MARS,SMC3,YTHDC2
GO:1990247	N6-methyladenosine-containing RNA binding	2	7	0.00059	ENSP00000161863,ENSP00000362918	YTHDC2,YTHDF2
GO:0003746	translation elongation factor activity	2	16	0.0012	ENSP00000331901,ENSP00000336702	EEF1G,EIF5A
GO:0090079	translation regulator activity, nucleic acid binding	3	99	0.0012	ENSP00000331901,ENSP00000336702,ENSP00000336721	EEF1G,EIF5A,LARP1
GO:0050750	low-density lipoprotein particle receptor binding	2	22	0.0016	ENSP00000299767,ENSP00000351926	AP2A1,HSP90B1
GO:0048027	mRNA 5'-UTR binding	2	24	0.0018	ENSP00000258729,ENSP00000336721	IGF2BP3,LARP1
GO:0005488	binding	18	11878	0.005	ENSP00000161863,ENSP00000221801,ENSP00000240185,ENSP00000258729,ENSP00000262027,ENSP00000264161,ENSP00000299767,ENSP00000331901,ENSP00000336702,ENSP00000336721,ENSP00000351926,ENSP00000354720,ENSP00000358997,ENSP00000360922,ENSP00000362918,ENSP00000377954,ENSP00000405620,ENSP00000467556	AP2A1,DARS,DHX30,EEF1G,EIF5A,FBL,GPATCH8,HSP90B1,IGF2BP3,IRAK1,LARP1,LARS,MARS,SMC3,STAU1,TARDBP,YTHDC2,YTHDF2
GO:0004004	ATP-dependent RNA helicase activity	2	66	0.009	ENSP00000161863,ENSP00000405620	DHX30,YTHDC2
GO:0003725	double-stranded RNA binding	2	70	0.0092	ENSP00000360922,ENSP00000405620	DHX30,STAU1
GO:0019903	protein phosphatase binding	2	123	0.0237	ENSP00000299767,ENSP00000360922	HSP90B1,STAU1
GO:0044877	protein-containing complex binding	4	968	0.044	ENSP00000221801,ENSP00000336702,ENSP00000351926,ENSP00000354720	AP2A1,EIF5A,FBL,SMC3
			GO:0003723	8.95e-09
			GO:0140098	5.2e-05
			GO:0045182	0.00019
			GO:0097159	0.00019
			GO:1901363	0.00019
			GO:0004812	0.00028
			GO:0003730	0.00059
			GO:0005524	0.00059
			GO:1990247	0.00059
			GO:0003746	0.0012
			GO:0090079	0.0012
			GO:0050750	0.0016
			GO:0048027	0.0018
			GO:0005488	0.005
			GO:0004004	0.009
			GO:0003725	0.0092
			GO:0019903	0.0237
			GO:0044877	0.044

## Sheet: Biological Process Ontology
Category	Term	Count	%	PValue	Genes	List Total	Pop Hits	Pop Total	Fold Enrichment	Bonferroni	Benjamini	FDR
GOTERM_BP_DIRECT	GO:0006418~tRNA aminoacylation for protein translation	3	15.7895	0.000735627	F8VZZ9, B4DER1, P56192, H0YI27, A0A024RBA2, P14868, H7BZ35, A0A140VJW5, C9JLC1, Q6NVI4, F8W0M7, Q53R85, H0YIC2, A0A087WXY1, H7C278, B4E266, D3DP78, H0YIP0, Q0VGM8, H0YHL6, C9J7S3, H0YHV5, F8VPL7, F8W0S4, Q53T60, F5H2V6, Q9P2J5, C9JQM9, H0YI94, F8VS26	18	40	16792	69.9667	0.0905642	0.0905642	0.852159
GOTERM_BP_DIRECT	GO:0045070~positive regulation of viral genome replication	2	10.5263	0.0260108	Q5JW28, O95793, H0YC33, H0YBM7, Q6PJX3, A0A087X1A5, A0A0B4J210, H0YBR8, H0YC73, Q59F99, H0YBW1, E5RHK4, B3KRE0, Q6PKG0, H0YAX9, F6UDC6, Q5JW30, H0YAN4, E5RH50, H0YBJ5	18	26	16792	71.7607	0.96662	0.817298	26.3978
GOTERM_BP_DIRECT	GO:0002224~toll-like receptor signaling pathway	2	10.5263	0.0269983	H7C3C1, H7C224, V9HWP2, Q96GW1, F8VPC7, H0YIV0, L8E7M9, P14625, H7C1F0, F8WAB6, H7C3G8, P51617, F8W026, H7C2I6, D3YTB5	18	27	16792	69.1029	0.970715	0.691764	27.261
GOTERM_BP_DIRECT	GO:0070555~response to interleukin-1	2	10.5263	0.0329041	H7C3C1, H7C224, Q9H6S0, L8E7M9, H7C1F0, F8WAB6, H7C3G8, P51617, D6RF50, D6RA70, H7C2I6, D6R9T8, D3YTB5	18	33	16792	56.5387	0.986647	0.660067	32.233
GOTERM_BP_DIRECT	GO:0034976~response to endoplasmic reticulum stress	2	10.5263	0.0733093	G3V162, A0A024R4E2, A0A087WX67, A0A0A0MSV7, V9HWP2, A0A087WW61, B1AKP7, K7EN94, P14625, A0A087WYY0, A0A087WXQ5, Q9H256, A0A087WZC9, A0A087WZM1, K7EJM5, A0A087WV68, F8VPC7, Q96GW1, K7EL26, H0YIV0, A0A087WX29, A0A087X260, F8W026, A0A087WTG4, A0A087WVX6, A0A087WXV3, Q13148, K7ENM9, K7EJ99	18	75	16792	24.877	0.999946	0.859745	58.7457
GOTERM_BP_DIRECT	GO:0006396~RNA processing	2	10.5263	0.0938345	H7BXY3, A0A024R2T6, D6RF50, Q7L2E3, D6RA70, F6R0H4, D6R9T8, Q9H6S0	18	97	16792	19.2348	0.999997	0.879784	68.2059
#term ID	term description	observed gene count	background gene count	false discovery rate	matching proteins in your network (IDs)	matching proteins in your network (labels)
GO:0006412	translation	7	362	2.71e-05	ENSP00000258729,ENSP00000262027,ENSP00000264161,ENSP00000331901,ENSP00000336702,ENSP00000336721,ENSP00000377954	DARS,EEF1G,EIF5A,IGF2BP3,LARP1,LARS,MARS
GO:0006518	peptide metabolic process	7	497	7.37e-05	ENSP00000258729,ENSP00000262027,ENSP00000264161,ENSP00000331901,ENSP00000336702,ENSP00000336721,ENSP00000377954	DARS,EEF1G,EIF5A,IGF2BP3,LARP1,LARS,MARS
GO:1903902	positive regulation of viral life cycle	4	59	7.37e-05	ENSP00000161863,ENSP00000336721,ENSP00000354720,ENSP00000360922	LARP1,SMC3,STAU1,YTHDC2
GO:0050792	regulation of viral process	5	174	8.66e-05	ENSP00000161863,ENSP00000240185,ENSP00000336721,ENSP00000354720,ENSP00000360922	LARP1,SMC3,STAU1,TARDBP,YTHDC2
GO:0043900	regulation of multi-organism process	6	372	0.00013	ENSP00000161863,ENSP00000240185,ENSP00000336721,ENSP00000354720,ENSP00000360922,ENSP00000362918	LARP1,SMC3,STAU1,TARDBP,YTHDC2,YTHDF2
GO:0043488	regulation of mRNA stability	4	113	0.00033	ENSP00000240185,ENSP00000258729,ENSP00000336721,ENSP00000362918	IGF2BP3,LARP1,TARDBP,YTHDF2
GO:0045070	positive regulation of viral genome replication	3	35	0.0004	ENSP00000161863,ENSP00000336721,ENSP00000360922	LARP1,STAU1,YTHDC2
GO:0006418	tRNA aminoacylation for protein translation	3	48	0.0008	ENSP00000262027,ENSP00000264161,ENSP00000377954	DARS,LARS,MARS
GO:0006403	RNA localization	4	211	0.002	ENSP00000221801,ENSP00000258729,ENSP00000336702,ENSP00000356548	EIF5A,FBL,IGF2BP3,LTV1
GO:0010608	posttranscriptional regulation of gene expression	5	441	0.002	ENSP00000240185,ENSP00000258729,ENSP00000336702,ENSP00000336721,ENSP00000362918	EIF5A,IGF2BP3,LARP1,TARDBP,YTHDF2
GO:0051851	modification by host of symbiont morphology or physiology	3	71	0.002	ENSP00000161863,ENSP00000240185,ENSP00000354720	SMC3,TARDBP,YTHDC2
GO:1903311	regulation of mRNA metabolic process	4	238	0.0026	ENSP00000240185,ENSP00000258729,ENSP00000336721,ENSP00000362918	IGF2BP3,LARP1,TARDBP,YTHDF2
GO:0044794	positive regulation by host of viral process	2	14	0.0034	ENSP00000161863,ENSP00000354720	SMC3,YTHDC2
GO:0044267	cellular protein metabolic process	11	3603	0.0044	ENSP00000221801,ENSP00000258729,ENSP00000262027,ENSP00000264161,ENSP00000299767,ENSP00000331901,ENSP00000336702,ENSP00000336721,ENSP00000351926,ENSP00000358997,ENSP00000377954	AP2A1,DARS,EEF1G,EIF5A,FBL,HSP90B1,IGF2BP3,IRAK1,LARP1,LARS,MARS
GO:0045727	positive regulation of translation	3	110	0.0048	ENSP00000336702,ENSP00000336721,ENSP00000362918	EIF5A,LARP1,YTHDF2
GO:0010467	gene expression	11	3733	0.0054	ENSP00000161863,ENSP00000221801,ENSP00000240185,ENSP00000258729,ENSP00000262027,ENSP00000264161,ENSP00000331901,ENSP00000336702,ENSP00000336721,ENSP00000377954,ENSP00000405620	DARS,DHX30,EEF1G,EIF5A,FBL,IGF2BP3,LARP1,LARS,MARS,TARDBP,YTHDC2
GO:0017148	negative regulation of translation	3	117	0.0054	ENSP00000258729,ENSP00000336721,ENSP00000362918	IGF2BP3,LARP1,YTHDF2
GO:0006417	regulation of translation	4	327	0.0063	ENSP00000258729,ENSP00000336702,ENSP00000336721,ENSP00000362918	EIF5A,IGF2BP3,LARP1,YTHDF2
GO:0044403	symbiont process	5	650	0.0072	ENSP00000161863,ENSP00000240185,ENSP00000351926,ENSP00000354720,ENSP00000358997	AP2A1,IRAK1,SMC3,TARDBP,YTHDC2
GO:0043170	macromolecule metabolic process	15	7453	0.0075	ENSP00000161863,ENSP00000221801,ENSP00000240185,ENSP00000258729,ENSP00000262027,ENSP00000264161,ENSP00000299767,ENSP00000331901,ENSP00000336702,ENSP00000336721,ENSP00000351926,ENSP00000354720,ENSP00000358997,ENSP00000377954,ENSP00000405620	AP2A1,DARS,DHX30,EEF1G,EIF5A,FBL,HSP90B1,IGF2BP3,IRAK1,LARP1,LARS,MARS,SMC3,TARDBP,YTHDC2
GO:0033554	cellular response to stress	7	1553	0.0091	ENSP00000240185,ENSP00000262027,ENSP00000299767,ENSP00000354720,ENSP00000358997,ENSP00000360922,ENSP00000377954	HSP90B1,IRAK1,LARS,MARS,SMC3,STAU1,TARDBP
GO:0031329	regulation of cellular catabolic process	5	743	0.0115	ENSP00000240185,ENSP00000258729,ENSP00000336721,ENSP00000362918,ENSP00000377954	IGF2BP3,LARP1,LARS,TARDBP,YTHDF2
GO:0048599	oocyte development	2	36	0.0115	ENSP00000161863,ENSP00000362918	YTHDC2,YTHDF2
GO:0042594	response to starvation	3	175	0.0117	ENSP00000262027,ENSP00000336721,ENSP00000377954	LARP1,LARS,MARS
GO:0048255	mRNA stabilization	2	37	0.0117	ENSP00000240185,ENSP00000336721	LARP1,TARDBP
GO:0031667	response to nutrient levels	4	455	0.013	ENSP00000262027,ENSP00000299767,ENSP00000336721,ENSP00000377954	HSP90B1,LARP1,LARS,MARS
GO:0034641	cellular nitrogen compound metabolic process	12	5126	0.013	ENSP00000161863,ENSP00000221801,ENSP00000240185,ENSP00000258729,ENSP00000262027,ENSP00000264161,ENSP00000331901,ENSP00000336702,ENSP00000336721,ENSP00000354720,ENSP00000377954,ENSP00000405620	DARS,DHX30,EEF1G,EIF5A,FBL,IGF2BP3,LARP1,LARS,MARS,SMC3,TARDBP,YTHDC2
GO:0050658	RNA transport	3	189	0.013	ENSP00000258729,ENSP00000336702,ENSP00000356548	EIF5A,IGF2BP3,LTV1
GO:0051445	regulation of meiotic cell cycle	2	45	0.0135	ENSP00000161863,ENSP00000362918	YTHDC2,YTHDF2
GO:0006886	intracellular protein transport	5	836	0.0144	ENSP00000299767,ENSP00000336702,ENSP00000351926,ENSP00000356548,ENSP00000377954	AP2A1,EIF5A,HSP90B1,LARS,LTV1
GO:0031669	cellular response to nutrient levels	3	206	0.0144	ENSP00000262027,ENSP00000299767,ENSP00000377954	HSP90B1,LARS,MARS
GO:1990928	response to amino acid starvation	2	47	0.0144	ENSP00000336721,ENSP00000377954	LARP1,LARS
GO:0071417	cellular response to organonitrogen compound	4	485	0.0146	ENSP00000262027,ENSP00000299767,ENSP00000336721,ENSP00000377954	HSP90B1,LARP1,LARS,MARS
GO:0034660	ncRNA metabolic process	4	497	0.0153	ENSP00000221801,ENSP00000262027,ENSP00000264161,ENSP00000377954	DARS,FBL,LARS,MARS
GO:0006807	nitrogen compound metabolic process	15	8349	0.0172	ENSP00000161863,ENSP00000221801,ENSP00000240185,ENSP00000258729,ENSP00000262027,ENSP00000264161,ENSP00000299767,ENSP00000331901,ENSP00000336702,ENSP00000336721,ENSP00000351926,ENSP00000354720,ENSP00000358997,ENSP00000377954,ENSP00000405620	AP2A1,DARS,DHX30,EEF1G,EIF5A,FBL,HSP90B1,IGF2BP3,IRAK1,LARP1,LARS,MARS,SMC3,TARDBP,YTHDC2
GO:0048518	positive regulation of biological process	12	5459	0.0172	ENSP00000161863,ENSP00000240185,ENSP00000262027,ENSP00000299767,ENSP00000336702,ENSP00000336721,ENSP00000351926,ENSP00000354720,ENSP00000358997,ENSP00000360922,ENSP00000362918,ENSP00000377954	AP2A1,EIF5A,HSP90B1,IRAK1,LARP1,LARS,MARS,SMC3,STAU1,TARDBP,YTHDC2,YTHDF2
GO:1901701	cellular response to oxygen-containing compound	5	896	0.0172	ENSP00000262027,ENSP00000299767,ENSP00000336721,ENSP00000358997,ENSP00000377954	HSP90B1,IRAK1,LARP1,LARS,MARS
GO:0031330	negative regulation of cellular catabolic process	3	234	0.0173	ENSP00000240185,ENSP00000336721,ENSP00000377954	LARP1,LARS,TARDBP
GO:0044260	cellular macromolecule metabolic process	13	6413	0.0181	ENSP00000221801,ENSP00000240185,ENSP00000258729,ENSP00000262027,ENSP00000264161,ENSP00000299767,ENSP00000331901,ENSP00000336702,ENSP00000336721,ENSP00000351926,ENSP00000354720,ENSP00000358997,ENSP00000377954	AP2A1,DARS,EEF1G,EIF5A,FBL,HSP90B1,IGF2BP3,IRAK1,LARP1,LARS,MARS,SMC3,TARDBP
GO:0042254	ribosome biogenesis	3	270	0.0244	ENSP00000221801,ENSP00000356548,ENSP00000405620	DHX30,FBL,LTV1
GO:1903312	negative regulation of mRNA metabolic process	2	74	0.0263	ENSP00000240185,ENSP00000336721	LARP1,TARDBP
GO:0044237	cellular metabolic process	15	8797	0.0289	ENSP00000161863,ENSP00000221801,ENSP00000240185,ENSP00000258729,ENSP00000262027,ENSP00000264161,ENSP00000299767,ENSP00000331901,ENSP00000336702,ENSP00000336721,ENSP00000351926,ENSP00000354720,ENSP00000358997,ENSP00000377954,ENSP00000405620	AP2A1,DARS,DHX30,EEF1G,EIF5A,FBL,HSP90B1,IGF2BP3,IRAK1,LARP1,LARS,MARS,SMC3,TARDBP,YTHDC2
GO:0044238	primary metabolic process	15	8808	0.029	ENSP00000161863,ENSP00000221801,ENSP00000240185,ENSP00000258729,ENSP00000262027,ENSP00000264161,ENSP00000299767,ENSP00000331901,ENSP00000336702,ENSP00000336721,ENSP00000351926,ENSP00000354720,ENSP00000358997,ENSP00000377954,ENSP00000405620	AP2A1,DARS,DHX30,EEF1G,EIF5A,FBL,HSP90B1,IGF2BP3,IRAK1,LARP1,LARS,MARS,SMC3,TARDBP,YTHDC2
GO:0002224	toll-like receptor signaling pathway	2	87	0.0333	ENSP00000299767,ENSP00000358997	HSP90B1,IRAK1
GO:0051704	multi-organism process	7	2222	0.0354	ENSP00000161863,ENSP00000240185,ENSP00000331901,ENSP00000351926,ENSP00000354720,ENSP00000358997,ENSP00000362918	AP2A1,EEF1G,IRAK1,SMC3,TARDBP,YTHDC2,YTHDF2
GO:0033036	macromolecule localization	7	2268	0.0392	ENSP00000221801,ENSP00000258729,ENSP00000299767,ENSP00000336702,ENSP00000351926,ENSP00000356548,ENSP00000377954	AP2A1,EIF5A,FBL,HSP90B1,IGF2BP3,LARS,LTV1
GO:0071705	nitrogen compound transport	6	1690	0.0408	ENSP00000258729,ENSP00000299767,ENSP00000336702,ENSP00000351926,ENSP00000356548,ENSP00000377954	AP2A1,EIF5A,HSP90B1,IGF2BP3,LARS,LTV1
GO:0048523	negative regulation of cellular process	10	4454	0.0416	ENSP00000161863,ENSP00000240185,ENSP00000258729,ENSP00000299767,ENSP00000336721,ENSP00000351926,ENSP00000354720,ENSP00000358997,ENSP00000362918,ENSP00000377954	AP2A1,HSP90B1,IGF2BP3,IRAK1,LARP1,LARS,SMC3,TARDBP,YTHDC2,YTHDF2
GO:0071840	cellular component organization or biogenesis	11	5342	0.0451	ENSP00000221801,ENSP00000240185,ENSP00000264161,ENSP00000299767,ENSP00000351926,ENSP00000354720,ENSP00000356548,ENSP00000358997,ENSP00000362918,ENSP00000377954,ENSP00000405620	AP2A1,DARS,DHX30,FBL,HSP90B1,IRAK1,LARS,LTV1,SMC3,TARDBP,YTHDF2
GO:0010557	positive regulation of macromolecule biosynthetic process	6	1758	0.0469	ENSP00000240185,ENSP00000262027,ENSP00000336702,ENSP00000336721,ENSP00000358997,ENSP00000362918	EIF5A,IRAK1,LARP1,MARS,TARDBP,YTHDF2
		GO:0006412	2.71e-05
		GO:0006518	7.37e-05
		GO:1903902	7.37e-05
		GO:0050792	8.66e-05
		GO:0043900	0.00013
		GO:0043488	0.00033
		GO:0045070	0.0004
		GO:0006418	0.0008
		GO:0006403	0.002
		GO:0010608	0.002
		GO:0051851	0.002
		GO:1903311	0.0026
		GO:0044794	0.0034
		GO:0044267	0.0044
		GO:0045727	0.0048
		GO:0010467	0.0054
		GO:0017148	0.0054
		GO:0006417	0.0063
		GO:0044403	0.0072
		GO:0043170	0.0075
		GO:0033554	0.0091
		GO:0031329	0.0115
		GO:0048599	0.0115
		GO:0042594	0.0117
		GO:0048255	0.0117
		GO:0031667	0.013
		GO:0034641	0.013
		GO:0050658	0.013
		GO:0051445	0.0135
		GO:0006886	0.0144
		GO:0031669	0.0144
		GO:1990928	0.0144
		GO:0071417	0.0146
		GO:0034660	0.0153
		GO:0006807	0.0172
		GO:0048518	0.0172
		GO:1901701	0.0172
		GO:0031330	0.0173
		GO:0044260	0.0181
		GO:0042254	0.0244
		GO:1903312	0.0263
		GO:0044237	0.0289
		GO:0044238	0.029
		GO:0002224	0.0333
		GO:0051704	0.0354
		GO:0033036	0.0392
		GO:0071705	0.0408
		GO:0048523	0.0416
		GO:0071840	0.0451
		GO:0010557	0.0469

## Sheet: Cellular Component Ontology
Category	Term	Count	%	PValue	Genes	List Total	Pop Hits	Pop Total	Fold Enrichment	Bonferroni	Benjamini	FDR
GOTERM_CC_DIRECT	GO:0005829~cytosol	12	63.1579	2.97038e-05	B4DER1, Q9Y5A9, Q6NVI4, Q53R85, S4R3J8, D3DP78, Q0VGM8, Q9UQE7, Q53YD7, F8WD15, H0YHV5, F8W0S4, Q96GW1, Q86VX4, Q53T60, H0YIV0, L8E7M9, H7C1F0, F5H2V6, Q9P2J5, I3L504, O95782, H7C2I6, P63241, F8VZZ9, P56192, A0A024RBA2, H0YI27, P14868, H7C224, H7BZ35, A0A140VJW5, V9HWP2, C9JLC1, B5BU99, F8W0M7, S4R3V3, H0YIC2, H7C278, A0A087WXY1, B4E266, P14625, F8WAB6, P51617, H0YIP0, O00425, H7C3C1, H0YHL6, M0R…	18	3315	18224	3.66496	0.0019882	0.0019882	0.0304609
GOTERM_CC_DIRECT	GO:0005737~cytoplasm	14	73.6842	6.0384e-05	G3V162, H0YBM7, H0YC73, Q6NVI4, Q53R85, D3DP78, Q0VGM8, Q9UQE7, Q53YD7, A0A0B4J210, Q6PJX3, H0YHV5, A0A087WXQ5, H0YBW1, Q86VX4, F6R0H4, L8E7M9, H7BXY3, H7C1F0, Q13148, H7C2I6, P63241, K7EJ99, F8VZZ9, A0A024RBA2, H7C224, A0A087WX67, A0A140VJW5, A0A0A0MSV7, A0A087WW61, B5BU99, F8W0M7, S4R3V3, B3KRE0, Q6PKG0, F8WAB6, H0YIP0, H7C3C1, H0YHL6, C9J7S3, Q7L2E3, A0A087WV68, Q59F99, H0YAN4, K7ENM9, F8VS26,…	18	5222	18224	2.71433	0.00403768	0.00202088	0.0619144
GOTERM_CC_DIRECT	GO:0016020~membrane	9	47.3684	0.000394288	M0QXC9, M0QXL5, M0R299, M0R0P1, H0YBM7, H0YC73, E5RHK4, Q53R85, D3DP78, Q5JW30, Q53YD7, Q5JW28, Q6PJX3, A0A0B4J210, H0YHV5, M0R2B0, F8W0S4, H0YBW1, Q96GW1, A0A0D9SFM2, Q53T60, H0YIV0, P22087, M0R2U2, F5H2V6, I3L504, Q96BS4, O95782, M0R2Q4, E5RH50, P63241, F8VZZ9, P56192, A0A024RBA2, H0YI27, P14868, H7BZ35, A0A140VJW5, V9HWP2, C9JLC1, F8W0M7, B3KRE0, H0YIC2, H7C278, Q6PKG0, P14625, H0YAX9, H0YIP0,…	18	2200	18224	4.14182	0.0260765	0.00876882	0.403656
GOTERM_CC_DIRECT	GO:0005634~nucleus	13	68.4211	0.000591793	M0QXC9, M0QXL5, G3V162, B4DER1, A0A024R4E2, M0R299, M0R0P1, Q9Y5A9, Q6NVI4, Q9H6S0, B1AKP7, S4R3J8, Q0VGM8, D6RF50, Q9UQE7, Q53YD7, F8WD15, M0R2B0, A0A087WXQ5, A0A087WZC9, F6R0H4, Q86VX4, A0A0D9SFM2, Q96GW1, P22087, H0YIV0, L8E7M9, A0A087WX29, H7C1F0, H7BXY3, M0R2U2, Q9P2J5, Q96BS4, A0A087WXV3, I3L504, M0R2Q4, Q13148, H7C2I6, P63241, K7EJ99, H7C224, A0A087WX67, A0A0A0MSV7, V9HWP2, A0A087WW61, B5B…	18	5415	18224	2.43061	0.0388857	0.00986648	0.605302
GOTERM_CC_DIRECT	GO:0070062~extracellular exosome	7	36.8421	0.0359824	M0QXL5, M0QXC9, M0R299, M0R0P1, Q53R85, D3DP78, Q5JW30, Q53YD7, Q5JW28, Q6PJX3, M0R2B0, H0YHV5, F8W0S4, Q96GW1, A0A0D9SFM2, H0YIV0, Q53T60, P22087, M0R2U2, F5H2V6, I3L504, Q96BS4, M0R2Q4, P63241, F8VZZ9, P56192, H0YI27, A0A024RBA2, P14868, H7BZ35, A0A140VJW5, V9HWP2, C9JLC1, F8W0M7, B3KRE0, H7C278, H0YIC2, P14625, H0YIP0, H0YHL6, O95793, C9J7S3, A0A087X1A5, I3L397, F8VPL7, Q59F99, F8VPC7, P26641,…	18	2811	18224	2.52121	0.91416	0.388018	31.3295
GOTERM_CC_DIRECT	GO:0005783~endoplasmic reticulum	4	21.0526	0.0394826	Q5JW28, O95793, Q6PJX3, A0A087X1A5, V9HWP2, Q59F99, Q96GW1, F8VPC7, Q9H6S0, H0YIV0, B3KRE0, P26641, P14625, F8W026, F6UDC6, D6RF50, D6RA70, Q5JW30, Q53YD7, D6R9T8	18	828	18224	4.89104	0.932725	0.362262	33.8441
GOTERM_CC_DIRECT	GO:0005694~chromosome	2	10.5263	0.0935997	M0QXC9, M0QXL5, M0R299, M0R0P1, M0R2B0, Q86VX4, A0A0D9SFM2, P22087, M0R2U2, M0R1H0, Q96BS4, M0R2Q4, Q9UQE7	18	105	18224	19.2847	0.998618	0.609616	63.5027
#term ID	term description	observed gene count	background gene count	false discovery rate	matching proteins in your network (IDs)	matching proteins in your network (labels)
GO:0017101	aminoacyl-tRNA synthetase multienzyme complex	3	12	6.71e-05	ENSP00000262027,ENSP00000264161,ENSP00000377954	DARS,LARS,MARS
GO:0032991	protein-containing complex	15	4792	9.13e-05	ENSP00000161863,ENSP00000221801,ENSP00000262027,ENSP00000264161,ENSP00000299767,ENSP00000336702,ENSP00000336721,ENSP00000351926,ENSP00000354720,ENSP00000356548,ENSP00000358997,ENSP00000360922,ENSP00000362918,ENSP00000377954,ENSP00000405620	AP2A1,DARS,DHX30,EIF5A,FBL,HSP90B1,IRAK1,LARP1,LARS,LTV1,MARS,SMC3,STAU1,YTHDC2,YTHDF2
GO:0035770	ribonucleoprotein granule	5	204	9.13e-05	ENSP00000161863,ENSP00000336721,ENSP00000360922,ENSP00000362918,ENSP00000405620	DHX30,LARP1,STAU1,YTHDC2,YTHDF2
GO:1990904	ribonucleoprotein complex	7	770	0.00024	ENSP00000161863,ENSP00000221801,ENSP00000336721,ENSP00000356548,ENSP00000360922,ENSP00000362918,ENSP00000405620	DHX30,FBL,LARP1,LTV1,STAU1,YTHDC2,YTHDF2
GO:0005829	cytosol	14	4958	0.00053	ENSP00000258729,ENSP00000262027,ENSP00000264161,ENSP00000299767,ENSP00000331901,ENSP00000336702,ENSP00000351926,ENSP00000354720,ENSP00000356548,ENSP00000358997,ENSP00000360922,ENSP00000362918,ENSP00000377954,ENSP00000405620	AP2A1,DARS,DHX30,EEF1G,EIF5A,HSP90B1,IGF2BP3,IRAK1,LARS,LTV1,MARS,SMC3,STAU1,YTHDF2
GO:0036464	cytoplasmic ribonucleoprotein granule	3	191	0.0264	ENSP00000336721,ENSP00000360922,ENSP00000362918	LARP1,STAU1,YTHDF2
GO:0010494	cytoplasmic stress granule	2	51	0.0327	ENSP00000336721,ENSP00000360922	LARP1,STAU1
GO:0044444	cytoplasmic part	16	9377	0.0327	ENSP00000161863,ENSP00000258729,ENSP00000262027,ENSP00000264161,ENSP00000299767,ENSP00000331901,ENSP00000336702,ENSP00000336721,ENSP00000351926,ENSP00000354720,ENSP00000356548,ENSP00000358997,ENSP00000360922,ENSP00000362918,ENSP00000377954,ENSP00000405620	AP2A1,DARS,DHX30,EEF1G,EIF5A,HSP90B1,IGF2BP3,IRAK1,LARP1,LARS,LTV1,MARS,SMC3,STAU1,YTHDC2,YTHDF2
GO:0043232	intracellular non-membrane-bounded organelle	10	4005	0.0408	ENSP00000161863,ENSP00000221801,ENSP00000240185,ENSP00000262027,ENSP00000336721,ENSP00000354720,ENSP00000358997,ENSP00000360922,ENSP00000362918,ENSP00000405620	DHX30,FBL,IRAK1,LARP1,MARS,SMC3,STAU1,TARDBP,YTHDC2,YTHDF2
GO:0030684	preribosome	2	74	0.0425	ENSP00000221801,ENSP00000356548	FBL,LTV1
GO:0005737	cytoplasm	17	11238	0.0465	ENSP00000161863,ENSP00000240185,ENSP00000258729,ENSP00000262027,ENSP00000264161,ENSP00000299767,ENSP00000331901,ENSP00000336702,ENSP00000336721,ENSP00000351926,ENSP00000354720,ENSP00000356548,ENSP00000358997,ENSP00000360922,ENSP00000362918,ENSP00000377954,ENSP00000405620	AP2A1,DARS,DHX30,EEF1G,EIF5A,HSP90B1,IGF2BP3,IRAK1,LARP1,LARS,LTV1,MARS,SMC3,STAU1,TARDBP,YTHDC2,YTHDF2
